# Supplementary material for: Whole genome sequencing, analyses of drug resistance-conferring mutations, and correlation with transmission of Mycobacterium tuberculosis carrying katG-S315T in Hanoi, Vietnam
Source: PubMed Central journal article supplement (PMC6814805; doi:10.1038/s41598-019-51812-7), 2019-10-25
Supplement: 41598_2019_51812_MOESM1_ESM.pdf [file 41598_2019_51812_MOESM1_ESM.pdf]

## Supplementary information

### Whole genome sequencing, analyses of drug resistance-conferring mutations, and correlation with transmission of *Mycobacterium tuberculosis* carrying *katG*-S315T in Hanoi, Vietnam

Nguyen Thi Le Hang<sup>1\*</sup>, Minako Hijikata<sup>2\*</sup>, Shinji Maeda<sup>3</sup>, Pham Huu Thuong<sup>4</sup>, Jun Ohashi<sup>5</sup>, Hoang Van Huan<sup>4</sup>, Nguyen Phuong Hoang<sup>6</sup>, Akiko Miyabayashi<sup>2</sup>, Vu Cao Cuong<sup>7</sup>, Shintaro Seto<sup>2</sup>, Nguyen Van Hung<sup>8</sup>, Naoto Keicho<sup>9,10</sup>

<sup>1</sup>NCGM-BMH Medical Collaboration Center, Hanoi, Vietnam.

<sup>2</sup>Department of Pathophysiology and Host Defense, The Research Institute of Tuberculosis, JATA, Tokyo, Japan.

<sup>3</sup>Faculty of Pharmaceutical Sciences, Hokkaido University of Science, Hokkaido, Japan.

<sup>4</sup>Hanoi Lung Hospital, Hanoi, Vietnam.

<sup>5</sup>Department of Biological Sciences, Graduate School of Science, The University of Tokyo, Tokyo, Japan.

<sup>6</sup>Department of Microbiology, Hanoi Lung Hospital, Hanoi, Vietnam.

<sup>7</sup>Hanoi Department of Health, Hanoi, Vietnam.

<sup>8</sup>Department of Microbiology, National Lung Hospital, Hanoi, Vietnam.

<sup>9</sup>The Research Institute of Tuberculosis JATA, Tokyo, Japan.

<sup>10</sup>National Center for Global Health and Medicine, Tokyo, Japan.

\*These authors contributed equally to this work.

Correspondence and request for materials should be addressed to N.K.

(nkeicho-tky@umin.ac.jp)

#### Corresponding author

Naoto Keicho, MD, PhD

Vice Director

The Research Institute of Tuberculosis

Japan Anti-Tuberculosis Association

3-1-24 Matsuyama, Kiyose, Tokyo 204-8533, JAPAN

E-mail: nkeicho-tky@umin.ac.jp

# Supplementary Fig. S1: Deletions identified in drug resistance-related genes observed in Hanoi samples

353-bp deletion in *pncA* (S1a), 6-bp deletion in *rpoB* (S1b), 1-bp deletion in *gid* (S1c), and 1-bp deletion in *ethA* (S1d) in Hanoi's 332 samples

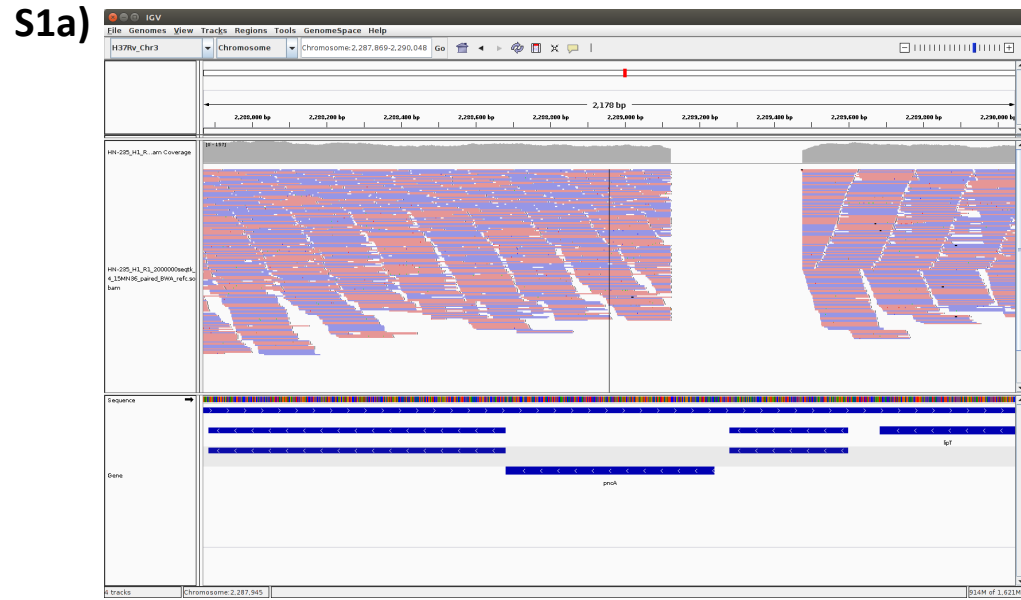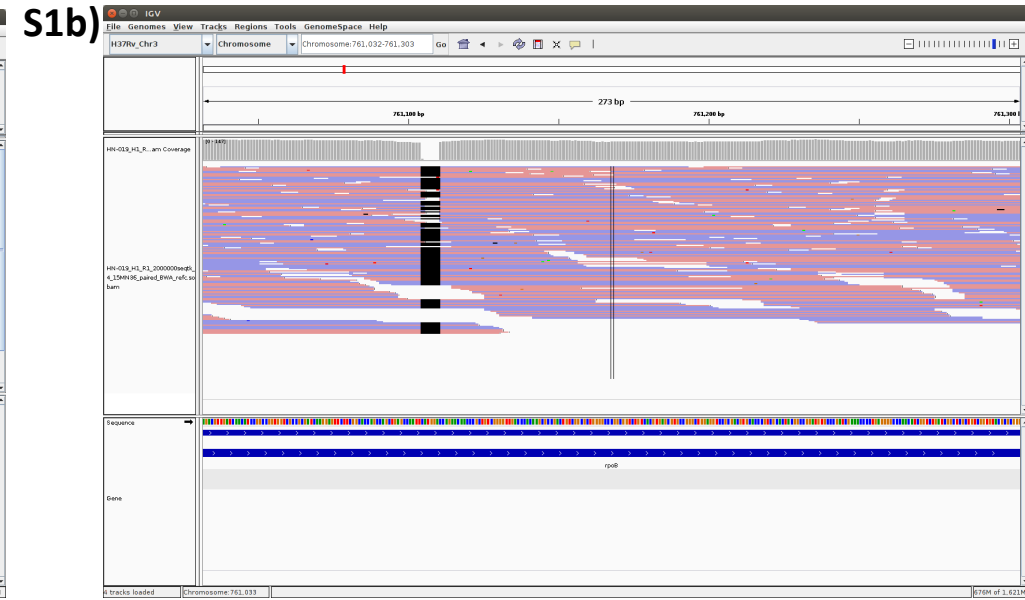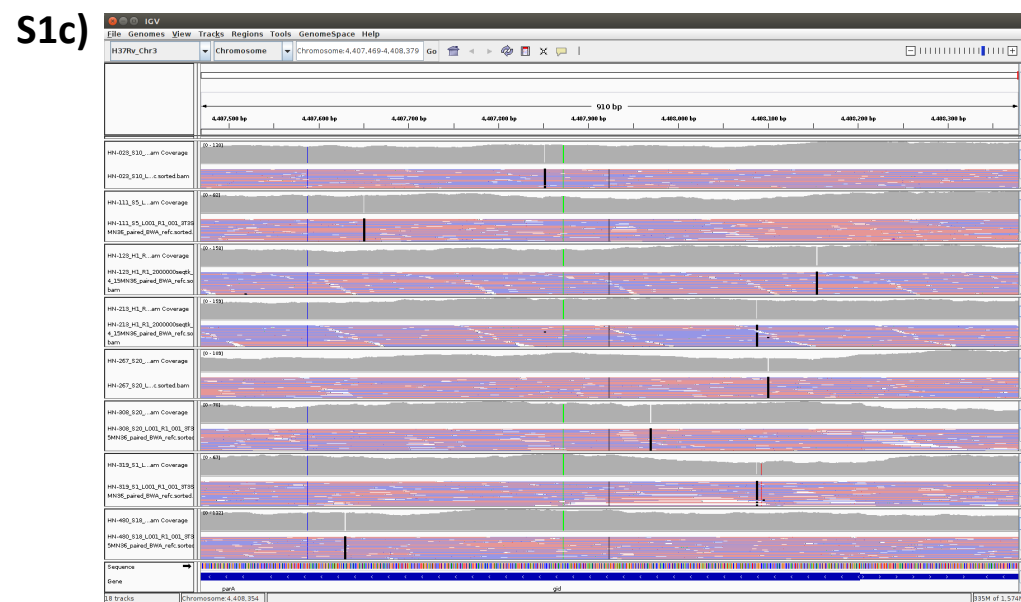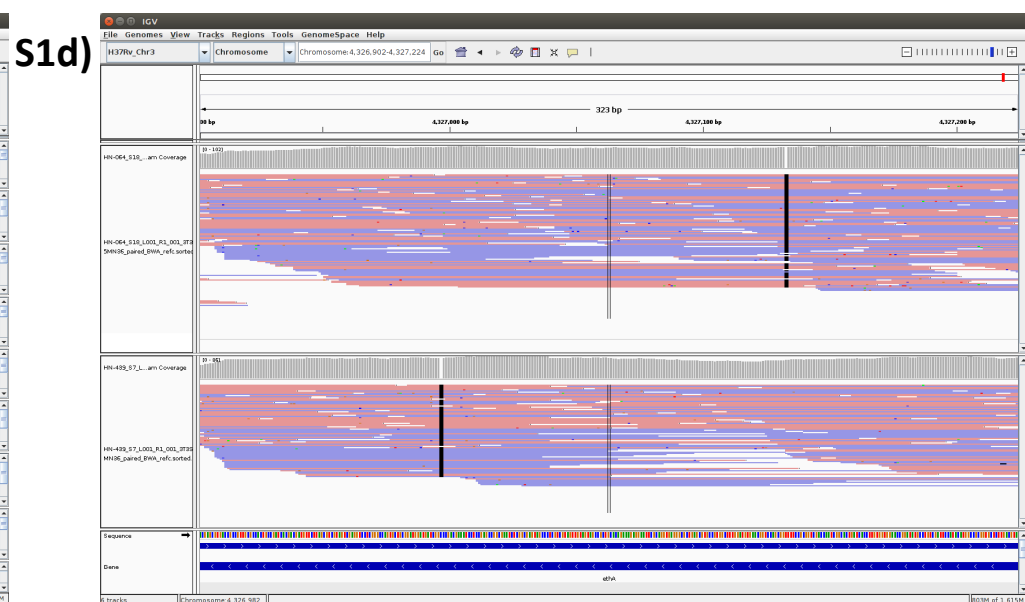

**Supplementary Fig S2: a) k-mers in *PPE18* and *PPE19* significantly associated with clustered strains carrying *katG*-S315T among Hanoi and KwaZulu-Natal study population, viewed using IGV**

***PPE18***

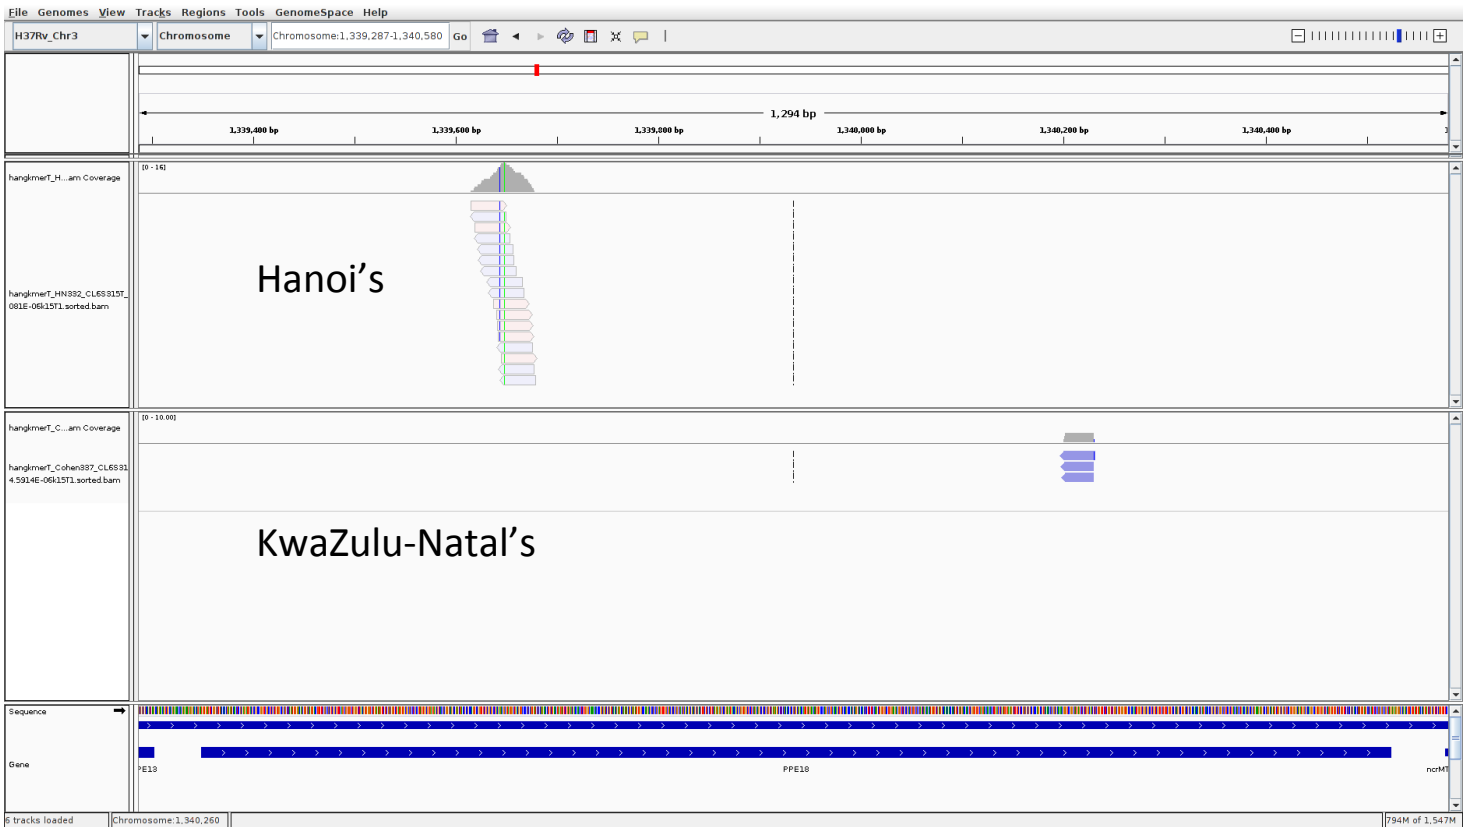

***PPE19***

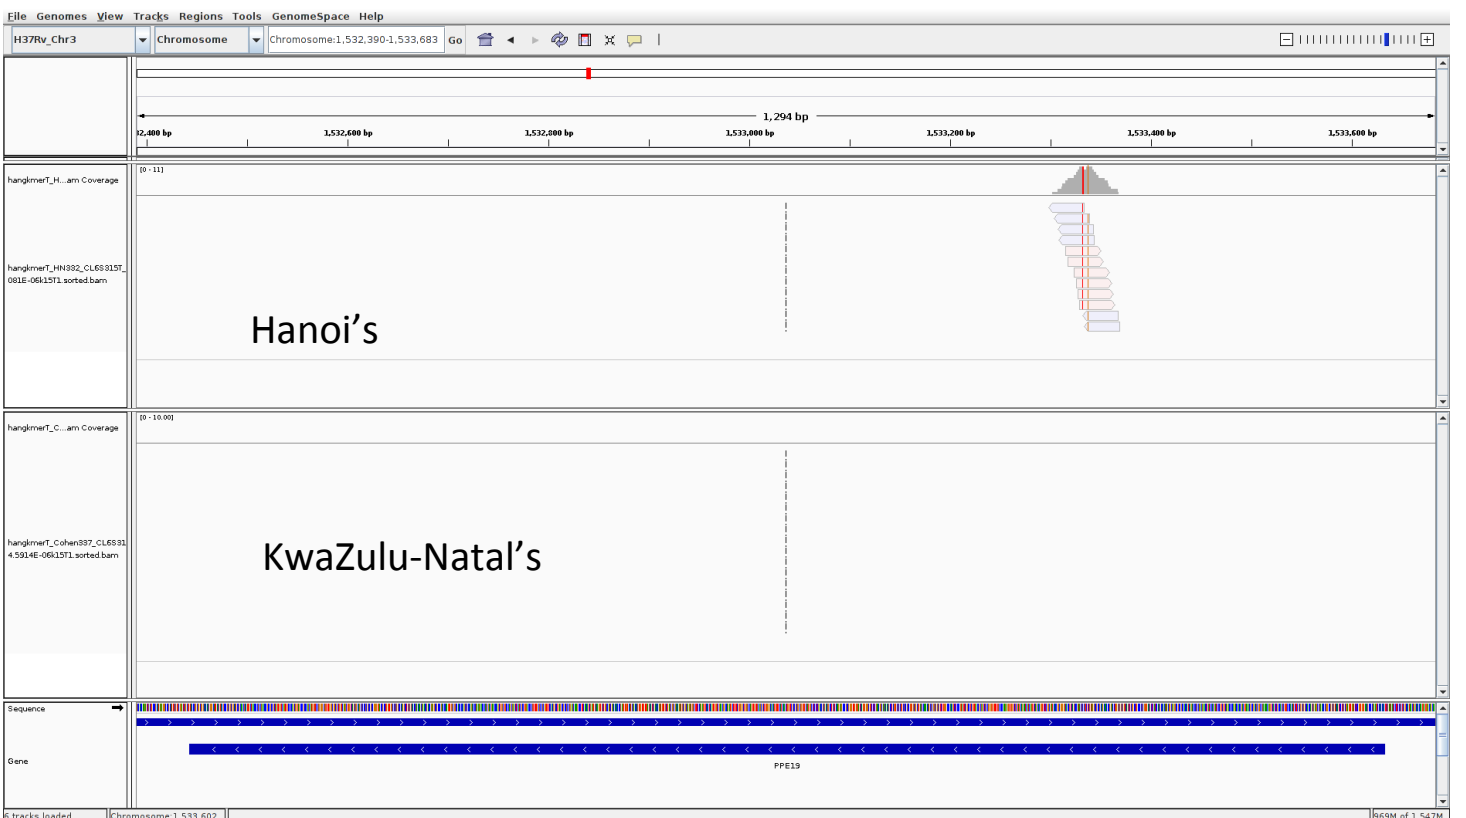

**Supplementary Fig S2: b)** k-mers in *gid* and *emrB* significantly associated with clustered strains carrying *katG*-S315T among Hanoi and KwaZulu-Natal study population, viewed using IGV

***gid***

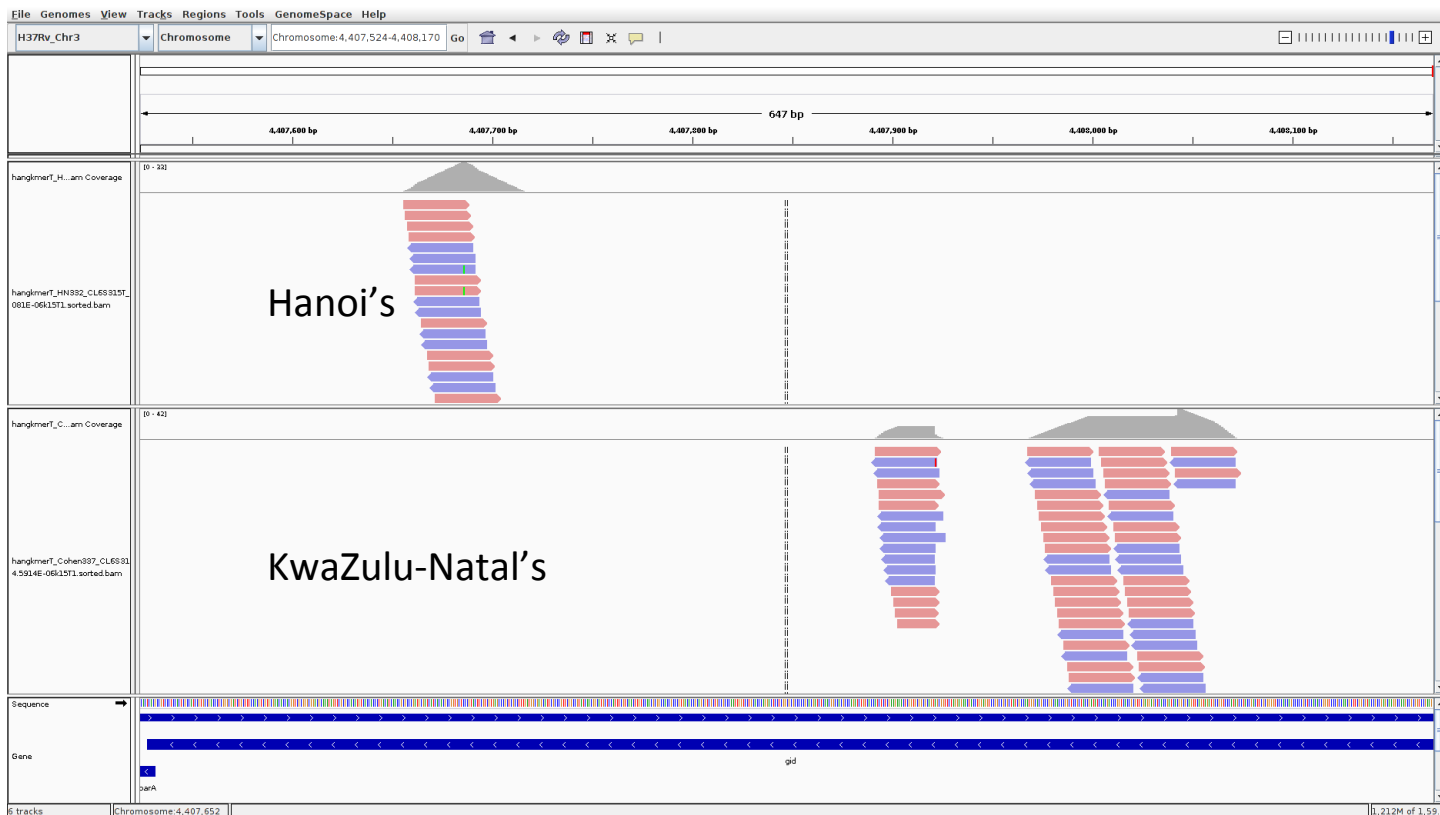

***emrB***

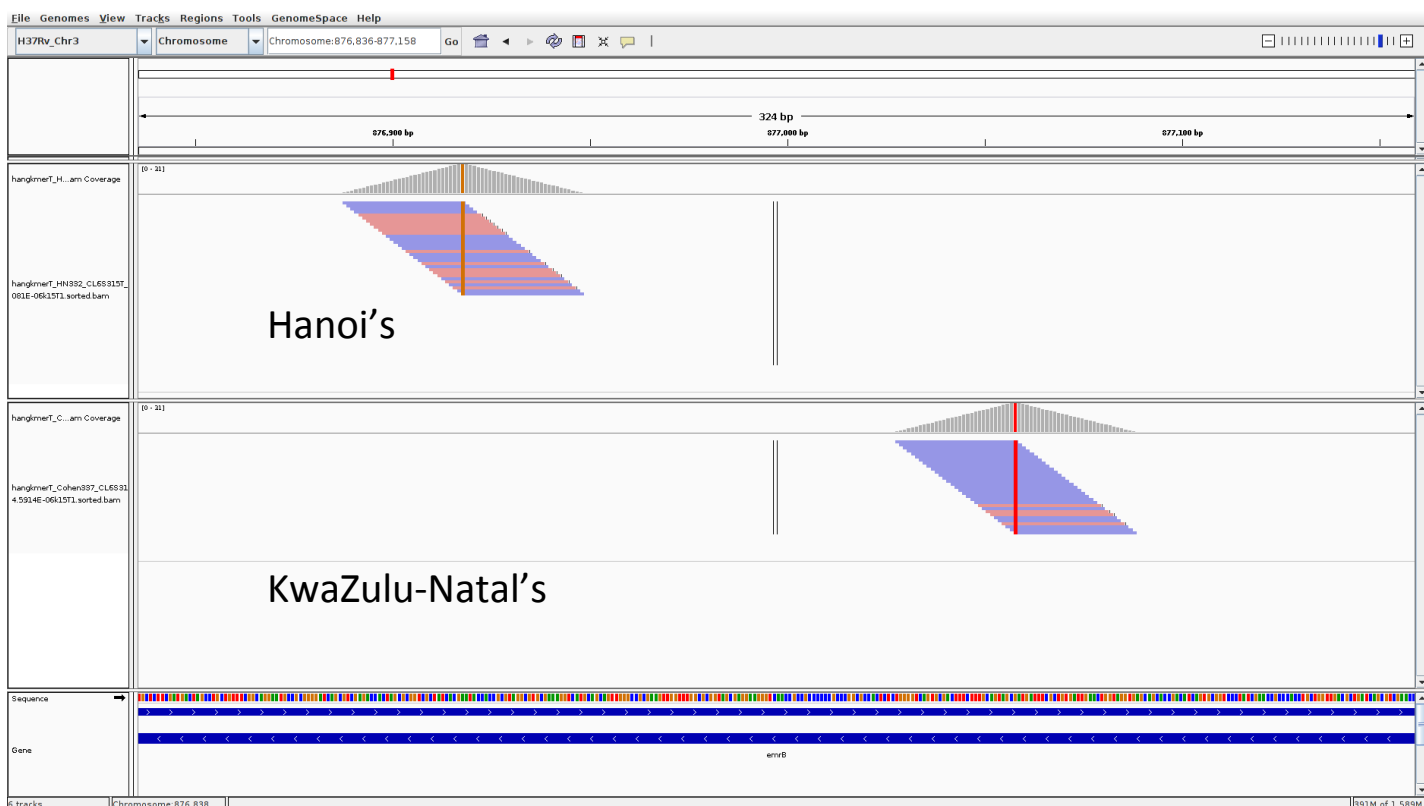

**Supplementary Fig S2: c)** k-mers in *Rv1588c* and *pncA* significantly associated with clustered strains carrying *katG*-S315T among Hanoi and KwaZulu-Natal study population, viewed using IGV

***Rv1588c***

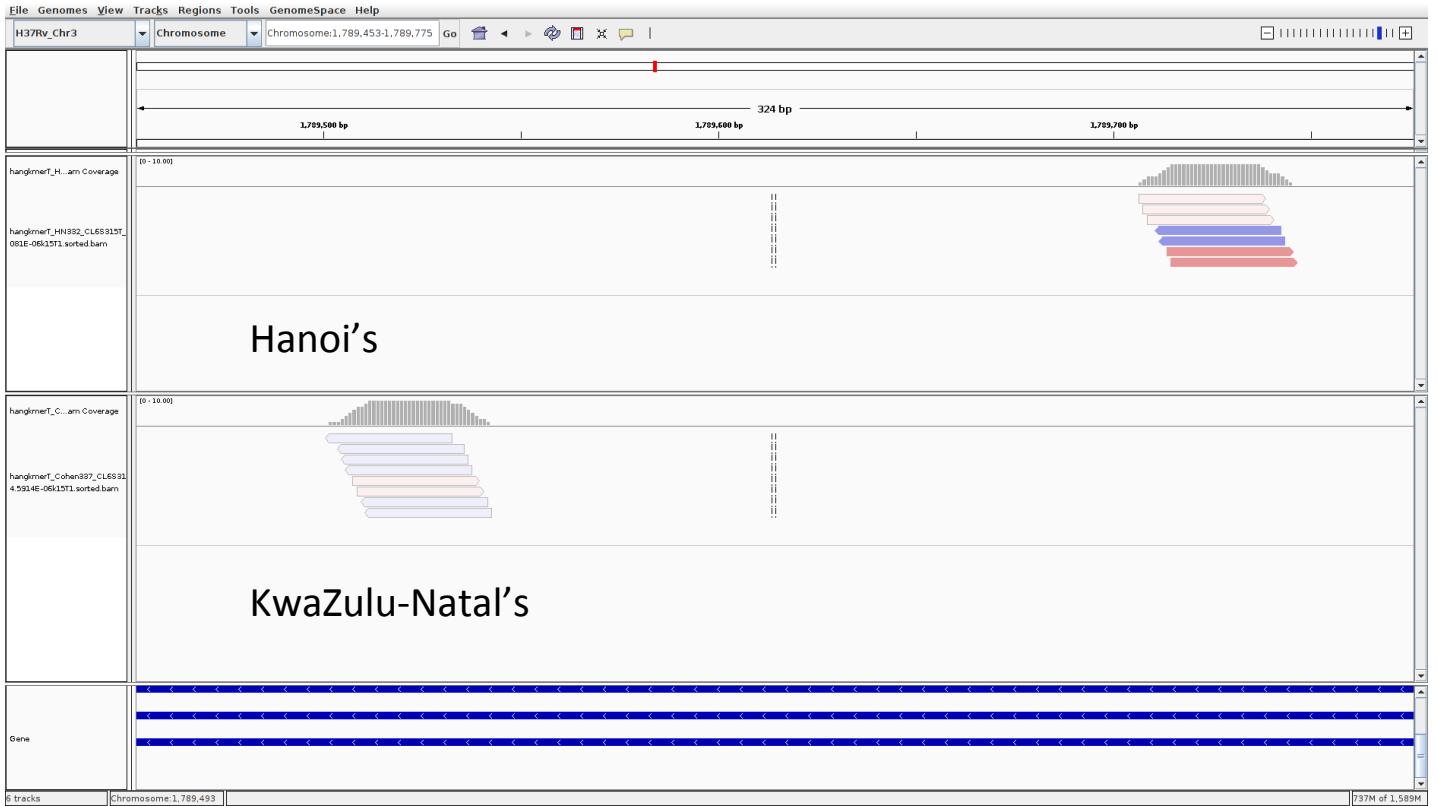

***pncA***

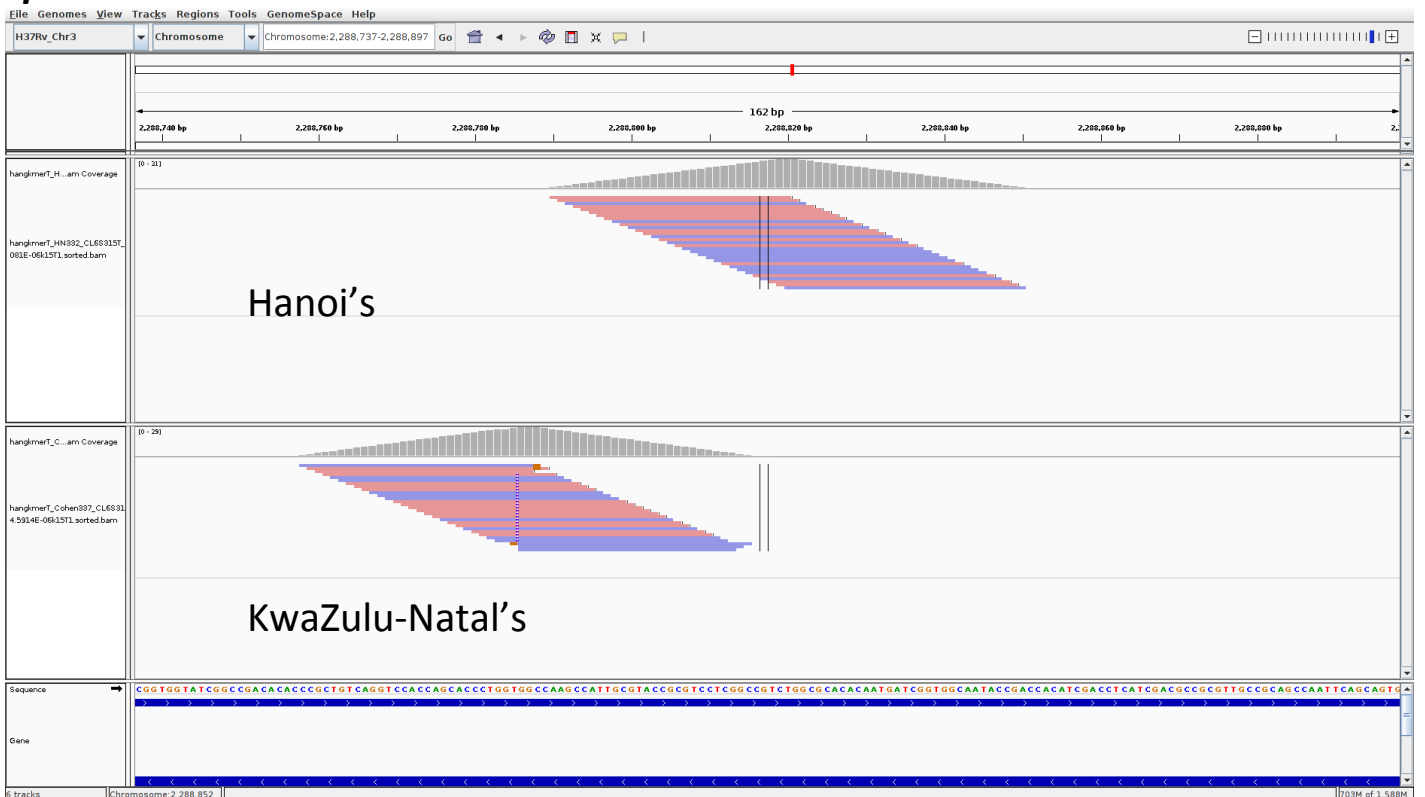

## Supplementary Fig. S3: Unitigs found by k-mer-based DBGWAS and their significant associations with cluster[+]/*katG*-S315T[+] (phenotype [+]) among Hanoi's 332 samples

Colors are continuously interpolated between blue for phenotype [-] and red for phenotype [+]. The size of the nodes corresponds to allele frequency. Nodes circled in black are significant unitigs: One significant unitig in *PPE18* (S3a), three in *gid* (S3b), two in *emrB* (S3c), and two in *Rv1588c* (S3d) are shown. No significant unitigs were identified in *pncA*.

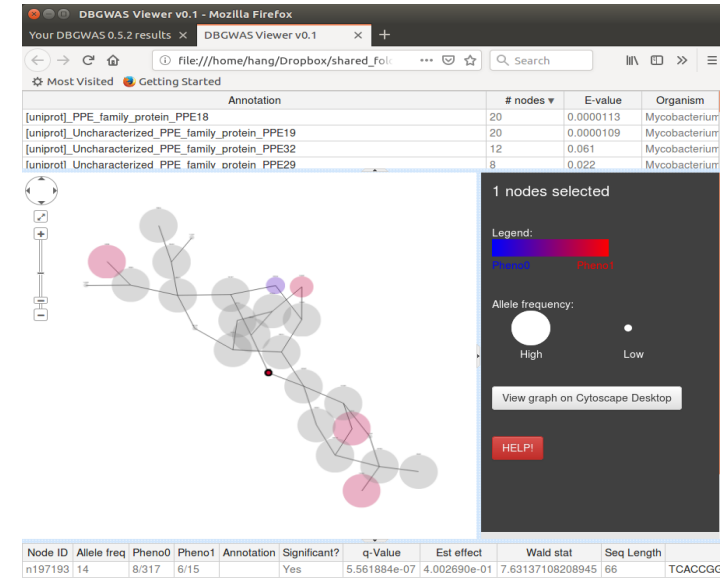

S3a) *PPE18*

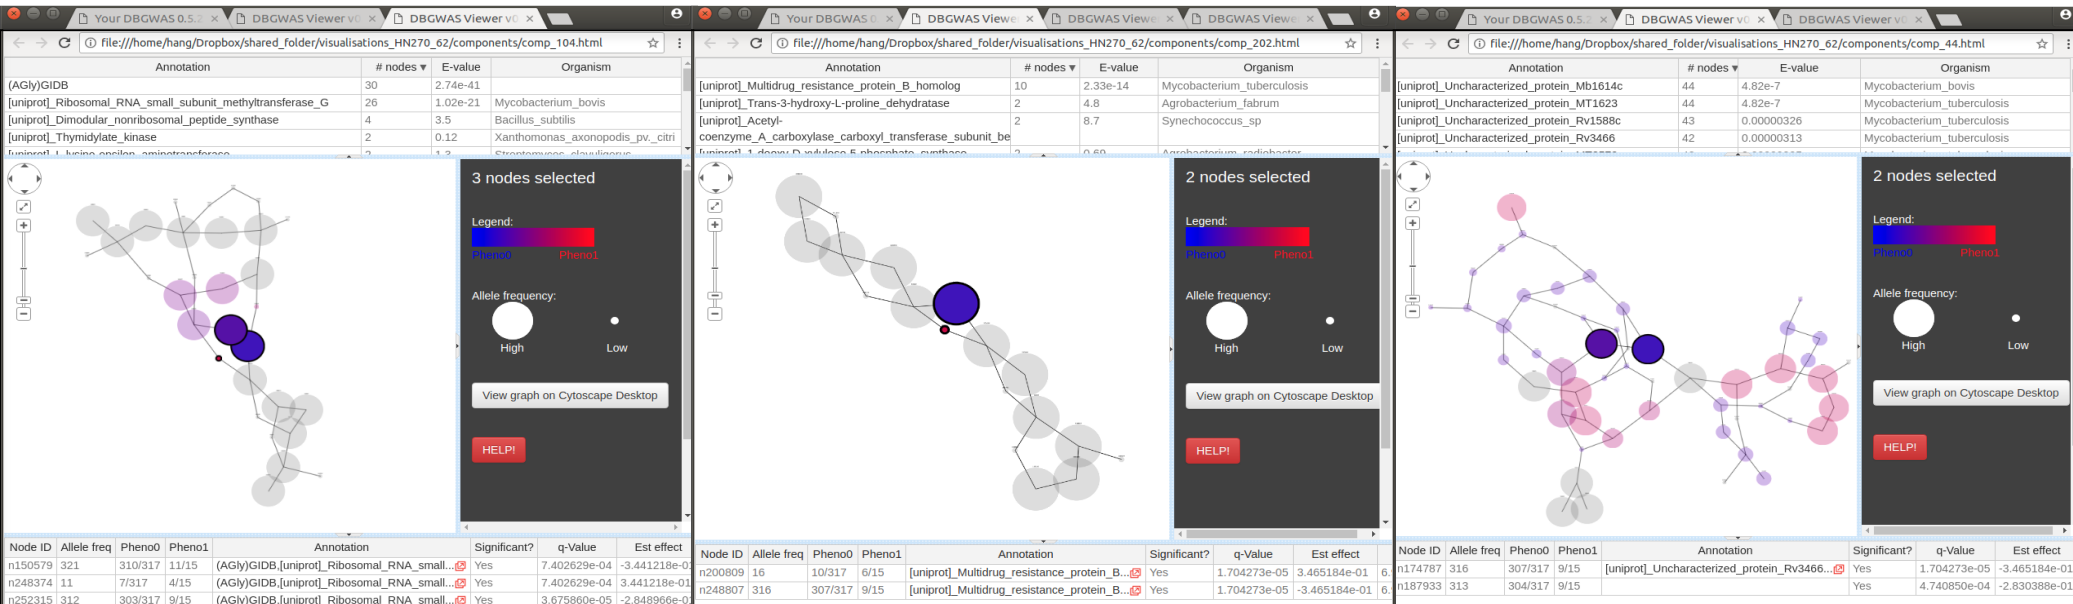

S3b) *gid*

S3c) *emrB*

S3d) *Rv1588c*

## Supplementary Fig. S4: Sequence similarity observed in *PPE18*, *PPE19* and *PPE60* of H37Rv genome

Nucleotide sequences of *PPE18*, *PPE19* and *PPE60* in the H37Rv genome (AL123456.3) were aligned. Dots indicate nucleotides identical to those shown in the top (*PPE18*), and dashes indicate gaps. When two sequences among the three have the same nucleotide, the regions were shown in a dark blue background. Upper and lower red boxes indicate the *PPE18/19* regions to which significant k-mers in Hanoi and KwaZulu-Natal samples were mapped respectively.

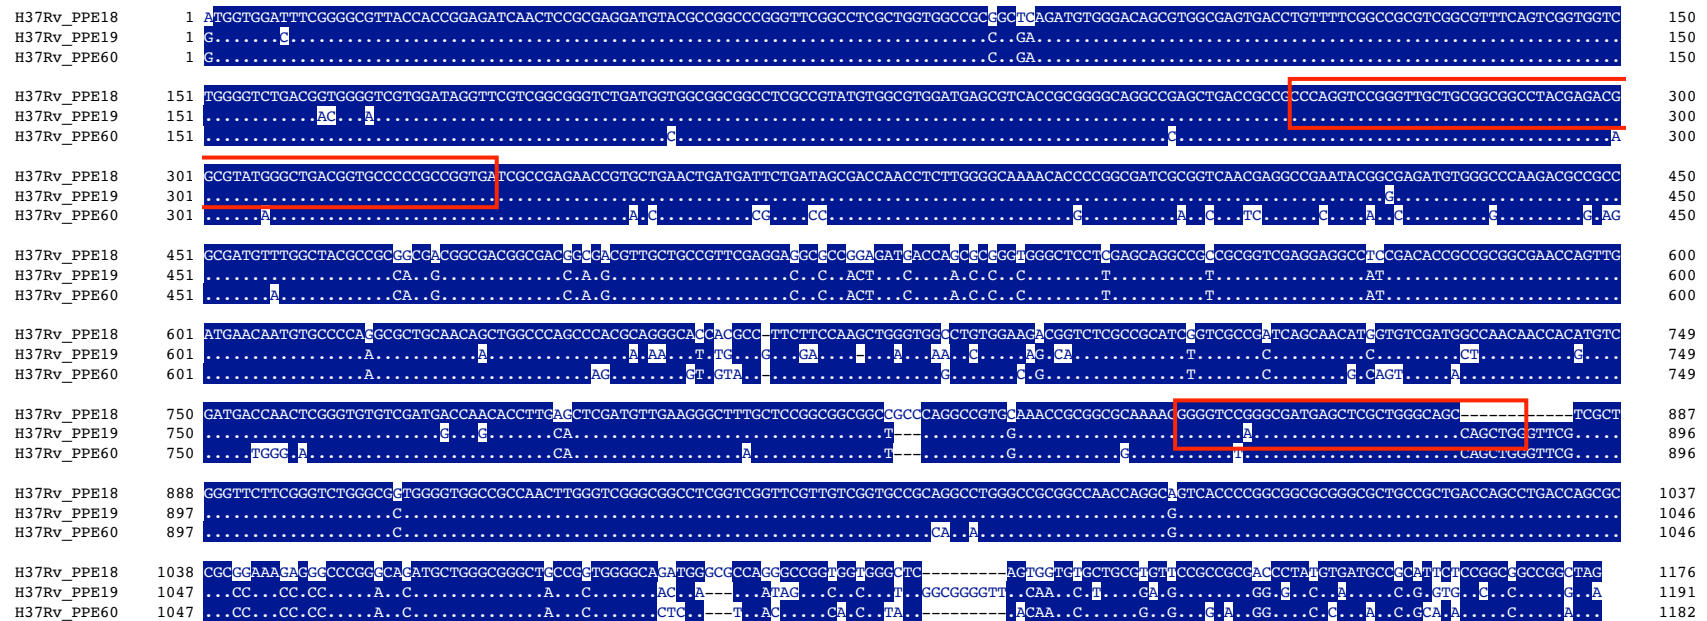

# Supplementary Fig. S5: GWAS was performed to investigate the association between SNVs and cluster[+]/katG-S315T[+] among Hanoi samples, controlling for population structure

S5a) Bayesian Wald test of significance of lineage-specific association with cluster[+]/katG-S315T[+]; S5b) Principal components correspond to lineages associated with cluster[+]/katG-S315T[+]; S5c) Manhattan plot showing significance of unique variants after controlling for population structure, with variants clustered by principal component.

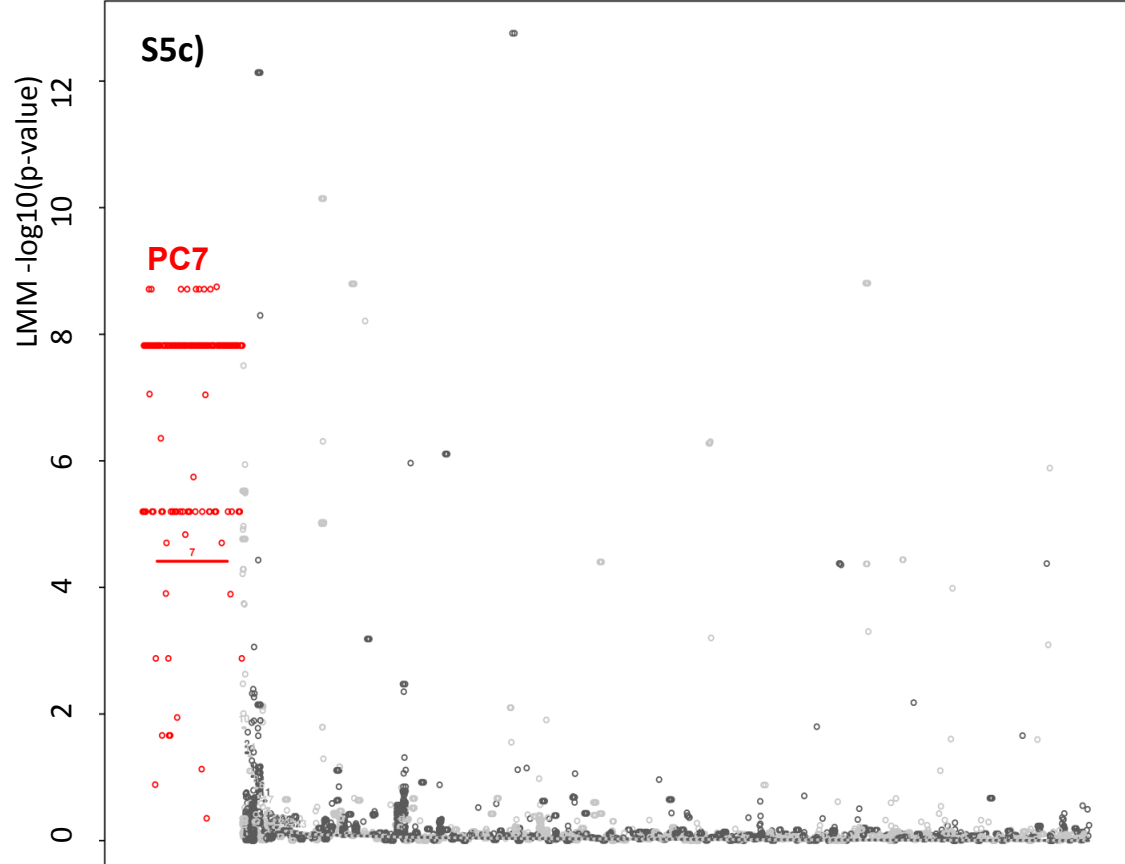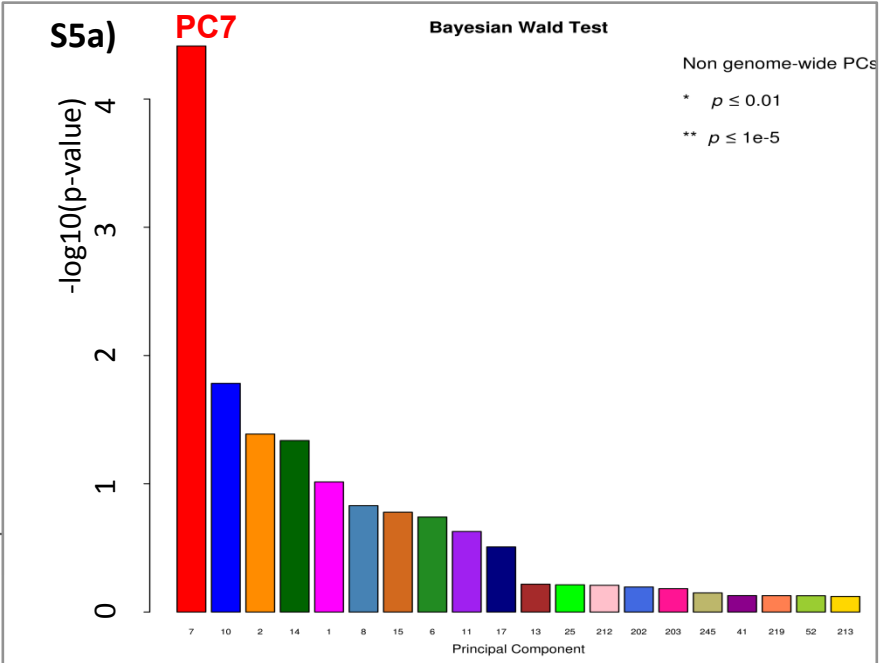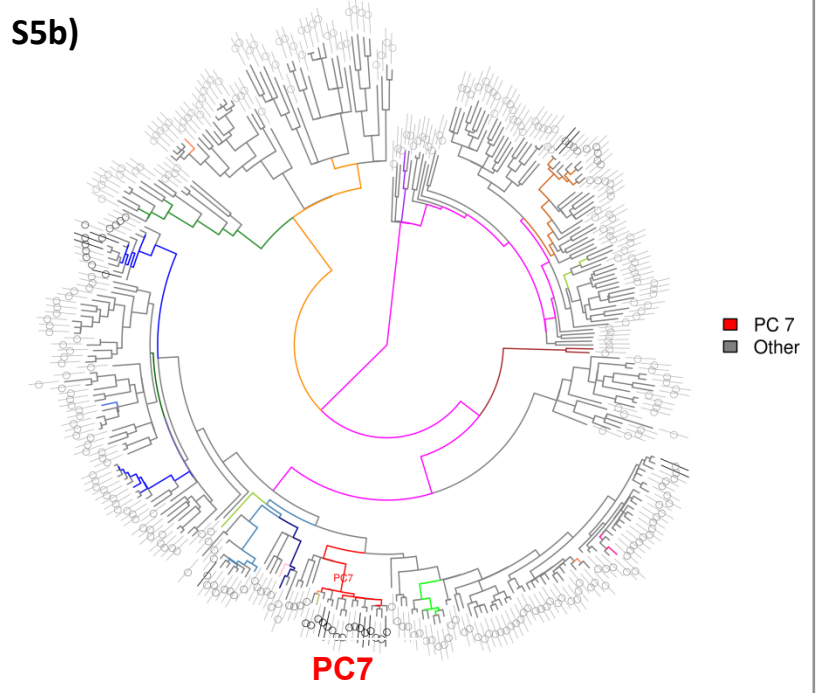



# Supplementary Fig S6: Genomic structure of the *PPE46* to *PPE47* region

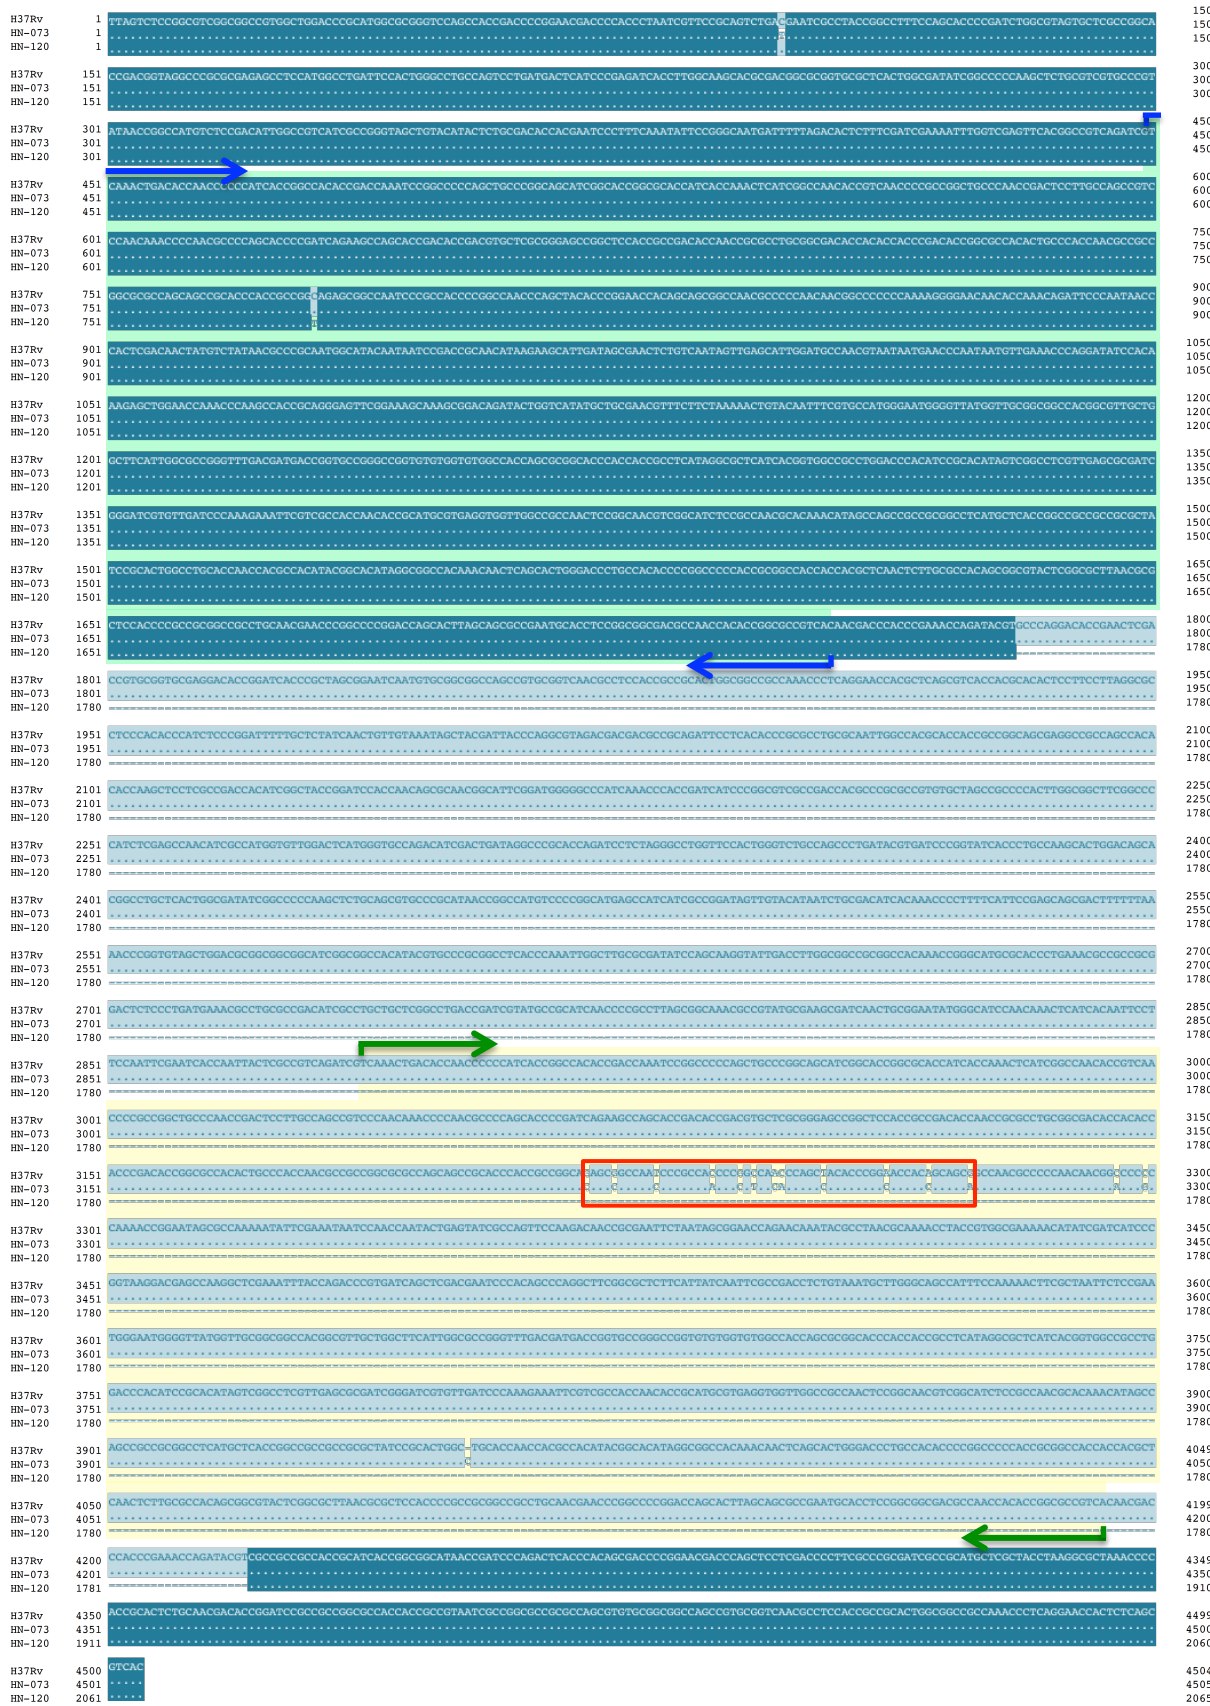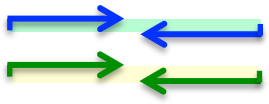

*PPE46*  
*PPE47*

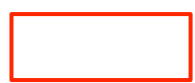

A major region with SNVs analyzed in the phylogenetic convergence tests

In two Hanoi strains (HN-073 and HN-120), nucleotide sequences spanning *PPE46* and *PPE47* were aligned with a reference strain H37Rv at positions 3376490 to 3380993 of AL123456.3. The *PPE46* region is overlaid in green, and the *PPE47* region in yellow. When three sequences show identical nucleotides, they are shown in white letters in a dark blue background. When two sequences among the three are identical, they are shown in a faint blue background. Dotted lines indicate the nucleotides identical to those of H37Rv (AL123456.3). A dashed line indicates a deleted region observed in HN-120.

The SNVs in *PPE47* were associated with the phenotype through phyOverlap analysis, and many of them were located in the region at positions from 3379708 to 3379763 of H37Rv (AL123456.3) shown in the red box in *PPE47*. These SNVs were identified in most of the Hanoi strains, including HN-073, irrespective of their lineages (L1, L2 or L4). However, in 35 Hanoi strains, including HN-120, *de novo* assembled sequences revealed the presence of a large deletion of 2,439 bp around the region. Therefore, the above SNVs were not detected. Such a deletion resulted in in-frame connection of *PPE46* and *PPE47* ORFs, and thus generated a novel chimeric PPE gene. The other rare deletions (two cases) are not presented here. The schematic diagrams are also shown in supplementary Fig. S7.

## Supplementary Fig. S7: Scheme of *PPE46/47* chimeric genes observed in Hanoi sample set

S7a) Structure and sequence similarity of *PPE46/47*

S7b) Three deletion patterns around *PPE46/47* and generation of chimeric genes

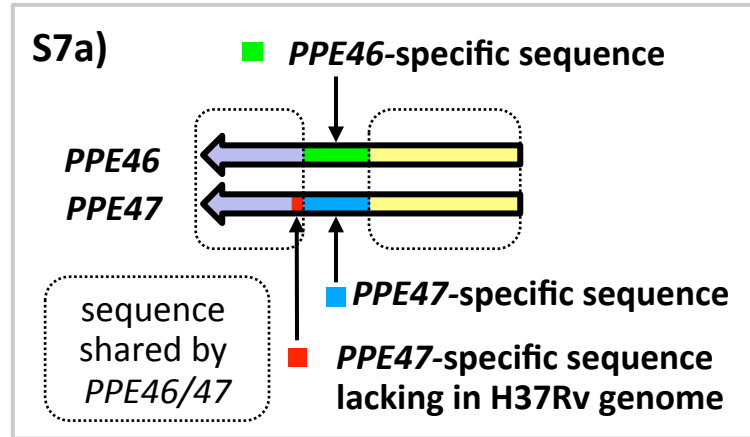

**S7b)**

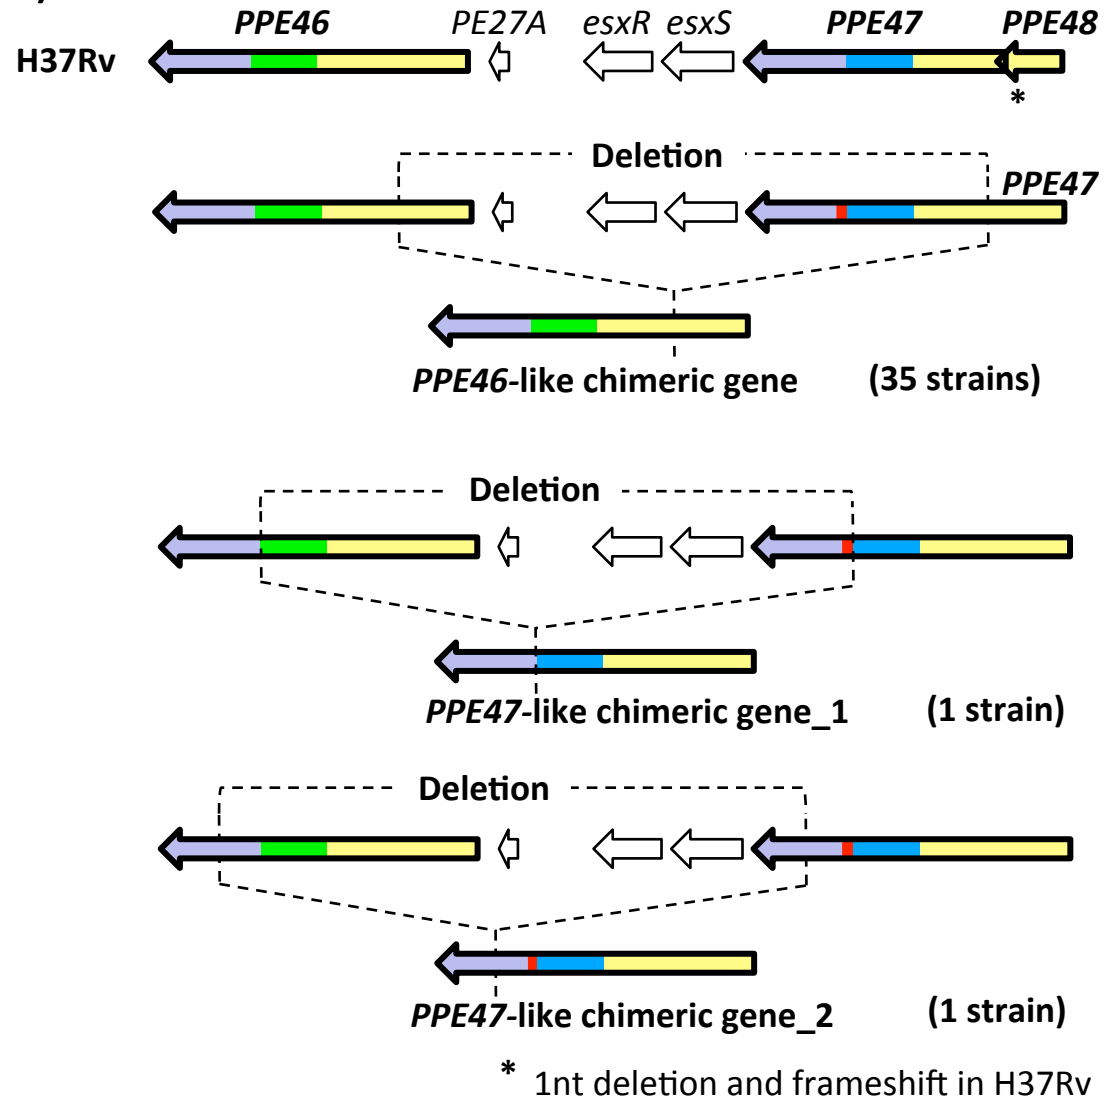

**Supplementary Table S1: Five common genes (*PPE18/PPE19*, *gid*, *emrB*, *pnca*, and *Rv1588c*) and their k-mers that were significantly associated with the clustered strains carrying the *katG*-S315T mutation of Hanoi's 332 and KwaZulu-Natal's 337 samples**

| rs                              | Kmer         | Kmer_sequence                   | Presence of k-mers among phenotype[-] | Presence of k-mers among phenotype[+] | Start position | End position | Gene         | P value (Wald test) | P value (Likelihood ratio test) |
|---------------------------------|--------------|---------------------------------|---------------------------------------|---------------------------------------|----------------|--------------|--------------|---------------------|---------------------------------|
| <b>Hanoi's study population</b> |              |                                 |                                       |                                       |                |              |              |                     |                                 |
| rs14                            | kmer5300519  | ACCGGCGGGGGCACCGTCAGCCCATACGTCG | 9                                     | 6                                     | 1339677        | 1339647      | <i>PPE18</i> | 2.60279E-12         | 1.840E-09                       |
| rs14                            | kmer16678658 | CATACGTCGTCGCGTAGGCCGCCGACGCAAC | 9                                     | 6                                     | 1339655        | 1339625      | <i>PPE18</i> | 2.60279E-12         | 1.840E-09                       |
| rs14                            | kmer9905015  | AGGTCCGGGTTGCTGCGGCGGCCTACGCGAC | 9                                     | 6                                     | 1339617        | 1339647      | <i>PPE18</i> | 2.60279E-12         | 1.840E-09                       |
| rs14                            | kmer6190163  | ACGCGACGACGTATGGGCTGACGGTGCCCC  | 9                                     | 6                                     | 1339641        | 1339671      | <i>PPE18</i> | 2.60279E-12         | 1.840E-09                       |
| rs14                            | kmer18366644 | CCCATACGTCGTCGCGTAGGCCGCCGACGCA | 9                                     | 6                                     | 1339657        | 1339627      | <i>PPE18</i> | 2.60279E-12         | 1.840E-09                       |
| rs14                            | kmer15960566 | CAGCCCATACGTCGTCGCGTAGGCCGCCGCA | 9                                     | 6                                     | 1339660        | 1339630      | <i>PPE18</i> | 2.60279E-12         | 1.840E-09                       |
| rs14                            | kmer21866099 | CGACGACGTATGGGCTGACGGTGCCCCGCC  | 9                                     | 6                                     | 1339645        | 1339674      | <i>PPE18</i> | 2.60279E-12         | 1.840E-09                       |
| rs14                            | kmer6778669  | ACGTCGTCGCGTAGGCCGCCGACGCAACCCG | 9                                     | 6                                     | 1339652        | 1339622      | <i>PPE18</i> | 2.60279E-12         | 1.840E-09                       |
| rs14                            | kmer32249733 | TACGCGACGACGTATGGGCTGACGGTGCCCC | 9                                     | 6                                     | 1339640        | 1339670      | <i>PPE18</i> | 2.60279E-12         | 1.840E-09                       |
| rs14                            | kmer30472299 | GCGACGACGTATGGGCTGACGGTGCCCCCG  | 9                                     | 6                                     | 1339645        | 1339673      | <i>PPE18</i> | 2.60279E-12         | 1.840E-09                       |
| rs14                            | kmer15135322 | CACCGGCGGGGGCACCGTCAGCCCATACGTC | 9                                     | 6                                     | 1339678        | 1339650      | <i>PPE18</i> | 2.60279E-12         | 1.840E-09                       |
| rs14                            | kmer25283133 | CGTCAGCCCATACGTCGTCGCGTAGGCCGCC | 9                                     | 6                                     | 1339663        | 1339633      | <i>PPE18</i> | 2.60279E-12         | 1.840E-09                       |
| rs14                            | kmer10848459 | ATACGTCGTCGCGTAGGCCGCCGACGCAACC | 9                                     | 6                                     | 1339654        | 1339624      | <i>PPE18</i> | 2.60279E-12         | 1.840E-09                       |
| rs14                            | kmer20760958 | CCTACGCGACGACGTATGGGCTGACGGTGCC | 9                                     | 6                                     | 1339638        | 1339668      | <i>PPE18</i> | 2.60279E-12         | 1.840E-09                       |
| rs14                            | kmer33799972 | TCCGGGTTGCTGCGGCGGCCTACGCGACGAC | 9                                     | 6                                     | 1339620        | 1339648      | <i>PPE18</i> | 2.60279E-12         | 1.840E-09                       |
| rs14                            | kmer29824538 | GCACCGTCAGCCCATACGTCGTCGCGTAGGC | 9                                     | 6                                     | 1339667        | 1339637      | <i>PPE18</i> | 2.60279E-12         | 1.840E-09                       |
| rs14                            | kmer24545936 | CGGCGGGGGCACCGTCAGCCCATACGTCGTC | 9                                     | 6                                     | 1339675        | 1339645      | <i>PPE18</i> | 2.60279E-12         | 1.840E-09                       |
| rs14                            | kmer20529728 | CCGTCAGCCCATACGTCGTCGCGTAGGCCCG | 9                                     | 6                                     | 1339664        | 1339634      | <i>PPE18</i> | 2.60279E-12         | 1.840E-09                       |
| rs14                            | kmer5379821  | ACCGTCAGCCCATACGTCGTCGCGTAGGCCG | 9                                     | 6                                     | 1339665        | 1339635      | <i>PPE18</i> | 2.60279E-12         | 1.840E-09                       |
| rs14                            | kmer20398506 | CCGGGTTGCTGCGGCGGCCTACGCGACGACG | 9                                     | 6                                     | 1339621        | 1339648      | <i>PPE18</i> | 2.60279E-12         | 1.840E-09                       |
| rs14                            | kmer30113731 | GCCCATACGTCGTCGCGTAGGCCGCCGACG  | 9                                     | 6                                     | 1339658        | 1339628      | <i>PPE18</i> | 2.60279E-12         | 1.840E-09                       |
| rs14                            | kmer33207065 | TCAGCCCATACGTCGTCGCGTAGGCCGCCCG | 9                                     | 6                                     | 1339661        | 1339631      | <i>PPE18</i> | 2.60279E-12         | 1.840E-09                       |
| rs14                            | kmer18352863 | CCCAGGTCGGGTTGCTGCGGCGGCCTACGC  | 9                                     | 6                                     | 1339614        | 1339643      | <i>PPE18</i> | 2.60279E-12         | 1.840E-09                       |
| rs14                            | kmer6703764  | ACGTATGGGCTGACGGTGCCCCCGCGTGA   | 9                                     | 6                                     | 1339650        | 1339679      | <i>PPE18</i> | 2.60279E-12         | 1.840E-09                       |
| rs14                            | kmer23336712 | CGCGACGACGTATGGGCTGACGGTGCCCCCG | 9                                     | 6                                     | 1339642        | 1339672      | <i>PPE18</i> | 2.60279E-12         | 1.840E-09                       |
| rs14                            | kmer24517828 | CGGCGGCCTACGCGACGACGTATGGGCTGAC | 9                                     | 6                                     | 1339632        | 1339662      | <i>PPE18</i> | 2.60279E-12         | 1.840E-09                       |
| rs14                            | kmer32288280 | TACGTCGTCGCGTAGGCCGCCGACGCAACCC | 9                                     | 6                                     | 1339653        | 1339623      | <i>PPE18</i> | 2.60279E-12         | 1.840E-09                       |
| rs14                            | kmer25463038 | CGTCGCGTAGGCCGCCGACGCAACCCGGACC | 9                                     | 6                                     | 1339648        | 1339618      | <i>PPE18</i> | 2.60279E-12         | 1.840E-09                       |
| rs14                            | kmer15159943 | CACCGTCAGCCCATACGTCGTCGCGTAGGCC | 9                                     | 6                                     | 1339666        | 1339636      | <i>PPE18</i> | 2.60279E-12         | 1.840E-09                       |
| rs14                            | kmer5835122  | ACGACGTATGGGCTGACGGTGCCCCCGCCGG | 9                                     | 6                                     | 1339646        | 1339676      | <i>PPE18</i> | 2.60279E-12         | 1.840E-09                       |
| rs14                            | kmer26030968 | CTACGCGACGACGTATGGGCTGACGGTGCCC | 9                                     | 6                                     | 1339639        | 1339669      | <i>PPE18</i> | 2.60279E-12         | 1.840E-09                       |
| rs14                            | kmer8483714  | AGCCCATACGTCGTCGCGTAGGCCGCCGACG | 9                                     | 6                                     | 1339659        | 1339629      | <i>PPE18</i> | 2.60279E-12         | 1.840E-09                       |
| rs14                            | kmer16444207 | CAGGTCCGGGTTGCTGCGGCGGCCTACGCGA | 9                                     | 6                                     | 1339616        | 1339643      | <i>PPE18</i> | 2.60279E-12         | 1.840E-09                       |
| rs14                            | kmer18004377 | CCAGGTCCGGGTTGCTGCGGCGGCCTACGCG | 9                                     | 6                                     | 1339615        | 1339643      | <i>PPE18</i> | 2.60279E-12         | 1.840E-09                       |
| rs14                            | kmer34614774 | TCGTCGCGTAGGCCGCCGACGCAACCCGGAC | 9                                     | 6                                     | 1339648        | 1339619      | <i>PPE18</i> | 2.60279E-12         | 1.840E-09                       |
| rs14                            | kmer18070492 | CCATACGTCGTCGCGTAGGCCGCCGACGCAA | 9                                     | 6                                     | 1339656        | 1339626      | <i>PPE18</i> | 2.60279E-12         | 1.840E-09                       |
| rs138                           | kmer22946493 | CGCCCGATGCGATCATCACACCGCGGTGCTC | 303                                   | 9                                     | 4407656        | 4407686      | <i>gid</i>   | 2.6576E-08          | 5.21335E-08                     |
| rs229                           | kmer677956   | AAAGGCGAGCGGGCTCACGACGAAGTACGGG | 310                                   | 11                                    | 4407716        | 4407686      | <i>gid</i>   | 1.6524E-06          | 2.31776E-06                     |
| rs229                           | kmer2514548  | AAGGCGAGCGGGCTCACGACGAAGTACGGGA | 310                                   | 11                                    | 4407715        | 4407685      | <i>gid</i>   | 1.6524E-06          | 2.31776E-06                     |
| rs229                           | kmer2663726  | AAGTACGGGAGCACCGGCGTGTGATGATCGC | 310                                   | 11                                    | 4407694        | 4407664      | <i>gid</i>   | 1.6524E-06          | 2.31776E-06                     |

|       |              |                                  |     |    |         |         |      |            |             |
|-------|--------------|----------------------------------|-----|----|---------|---------|------|------------|-------------|
| rs229 | kmer4088267  | ACACGCCGGTGCTCCCGTACTTCGTCGTGAG  | 310 | 11 | 4407673 | 4407703 | gid  | 1.6524E-06 | 2.31776E-06 |
| rs229 | kmer5725621  | ACGAAGTACGGGAGCACCGGCGTGTGATGAT  | 310 | 11 | 4407697 | 4407667 | gid  | 1.6524E-06 | 2.31776E-06 |
| rs229 | kmer5791837  | ACGACGAAGTACGGGAGCACCGGCGTGTGAT  | 310 | 11 | 4407700 | 4407670 | gid  | 1.6524E-06 | 2.31776E-06 |
| rs229 | kmer6155368  | ACGCCGGTGCTCCCGTACTTCGTCGTGAGCC  | 310 | 11 | 4407675 | 4407705 | gid  | 1.6524E-06 | 2.31776E-06 |
| rs229 | kmer6542701  | ACGGGAGCACCGGCGTGTGATGATCGCATCG  | 310 | 11 | 4407690 | 4407660 | gid  | 1.6524E-06 | 2.31776E-06 |
| rs229 | kmer8914725  | AGCGGGCTCACGACGAAGTACGGGAGCACCG  | 310 | 11 | 4407709 | 4407679 | gid  | 1.6524E-06 | 2.31776E-06 |
| rs229 | kmer9582846  | AGGCGAGCGGGCTCACGACGAAGTACGGGAG  | 310 | 11 | 4407714 | 4407684 | gid  | 1.6524E-06 | 2.31776E-06 |
| rs229 | kmer10092635 | AGTACGGGAGCACCGGCGTGTGATGATCGCA  | 310 | 11 | 4407693 | 4407663 | gid  | 1.6524E-06 | 2.31776E-06 |
| rs229 | kmer12721235 | ATGCGATCATCACACGCCGGTGCTCCCGTAC  | 310 | 11 | 4407662 | 4407692 | gid  | 1.6524E-06 | 2.31776E-06 |
| rs229 | kmer14809154 | CACACGCCGGTGCTCCCGTACTTCGTCGTGA  | 310 | 11 | 4407672 | 4407702 | gid  | 1.6524E-06 | 2.31776E-06 |
| rs229 | kmer15271688 | CACGACGAAGTACGGGAGCACCGGCGTGTGA  | 310 | 11 | 4407701 | 4407671 | gid  | 1.6524E-06 | 2.31776E-06 |
| rs229 | kmer15362897 | CACGCCGGTGCTCCCGTACTTCGTCGTGAGC  | 310 | 11 | 4407674 | 4407704 | gid  | 1.6524E-06 | 2.31776E-06 |
| rs229 | kmer16763993 | CATCACACGCCGGTGCTCCCGTACTTCGTCG  | 310 | 11 | 4407669 | 4407699 | gid  | 1.6524E-06 | 2.31776E-06 |
| rs229 | kmer18726627 | CCCGATGCGATCATCACACGCCGGTGCTCCC  | 310 | 11 | 4407658 | 4407688 | gid  | 1.6524E-06 | 2.31776E-06 |
| rs229 | kmer19509795 | CCGATGCGATCATCACACGCCGGTGCTCCCG  | 310 | 11 | 4407659 | 4407689 | gid  | 1.6524E-06 | 2.31776E-06 |
| rs229 | kmer20458822 | CCGGTGCTCCCGTACTTCGTCGTGAGCCCGC  | 310 | 11 | 4407678 | 4407708 | gid  | 1.6524E-06 | 2.31776E-06 |
| rs229 | kmer21622226 | CGAAGTACGGGAGCACCGGCGTGTGATGATC  | 310 | 11 | 4407696 | 4407666 | gid  | 1.6524E-06 | 2.31776E-06 |
| rs229 | kmer22203970 | CGAGCGGGCTCACGACGAAGTACGGGAGCAC  | 310 | 11 | 4407711 | 4407681 | gid  | 1.6524E-06 | 2.31776E-06 |
| rs229 | kmer22430891 | CGATCATCACACGCCGGTGCTCCCGTACTTC  | 310 | 11 | 4407665 | 4407695 | gid  | 1.6524E-06 | 2.31776E-06 |
| rs229 | kmer23191426 | CGCCGGTGCTCCCGTACTTCGTCGTGAGCCC  | 310 | 11 | 4407676 | 4407706 | gid  | 1.6524E-06 | 2.31776E-06 |
| rs229 | kmer24792033 | CGGGCTCACGACGAAGTACGGGAGCACCGGC  | 310 | 11 | 4407707 | 4407677 | gid  | 1.6524E-06 | 2.31776E-06 |
| rs229 | kmer29269604 | GAGCGGGCTCACGACGAAGTACGGGAGCAC   | 310 | 11 | 4407710 | 4407680 | gid  | 1.6524E-06 | 2.31776E-06 |
| rs229 | kmer30152690 | GCCCGATGCGATCATCACACGCCGGTGCTCC  | 310 | 11 | 4407657 | 4407687 | gid  | 1.6524E-06 | 2.31776E-06 |
| rs229 | kmer30839817 | GCTCCCGTACTTCGTCGTGAGCCCGCTCGCC  | 310 | 11 | 4407683 | 4407713 | gid  | 1.6524E-06 | 2.31776E-06 |
| rs229 | kmer32272728 | TACGGGAGCACCGGCGTGTGATGATCGCATC  | 310 | 11 | 4407691 | 4407661 | gid  | 1.6524E-06 | 2.31776E-06 |
| rs229 | kmer33310104 | TCATCACACGCCGGTGCTCCCGTACTTCGTC  | 310 | 11 | 4407668 | 4407698 | gid  | 1.6524E-06 | 2.31776E-06 |
| rs229 | kmer35746990 | TGCTCCCGTACTTCGTCGTGAGCCCGCTCGC  | 310 | 11 | 4407682 | 4407712 | gid  | 1.6524E-06 | 2.31776E-06 |
| rs230 | kmer12721234 | ATGCGATCATCACACGCCGGTGCTACCGTAC  | 7   | 4  | 4407662 | 4407692 | gid  | 1.6524E-06 | 2.31776E-06 |
| rs230 | kmer32277649 | TACGGTAGCACCGGCGTGTGATGATCGCATC  | 7   | 4  | 4407691 | 4407661 | gid  | 1.6524E-06 | 2.31776E-06 |
| rs44  | kmer4635999  | ACCACTAGCGCGTGCCTATCACGGATAACCA  | 11  | 6  | 876894  | 876924  | emrB | 1.1445E-10 | 8.57904E-08 |
| rs44  | kmer5673735  | ACCTTTCGCACGCCTACGCGGTGGTATCCGT  | 11  | 6  | 876945  | 876915  | emrB | 1.1445E-10 | 8.57904E-08 |
| rs44  | kmer6167939  | ACGCCTACGCGGTGGTATCCGTGATAGCGAC  | 11  | 6  | 876936  | 876906  | emrB | 1.1445E-10 | 8.57904E-08 |
| rs44  | kmer6268732  | ACGCGGTGGTATCCGTGATAGCGACCGCGCT  | 11  | 6  | 876930  | 876900  | emrB | 1.1445E-10 | 8.57904E-08 |
| rs44  | kmer6944984  | ACTAGCGCGGTGCCTATCACGGATAACCCG   | 11  | 6  | 876897  | 876927  | emrB | 1.1445E-10 | 8.57904E-08 |
| rs44  | kmer7700944  | AGACCACTAGCGCGTGCCTATCACGGATAAC  | 11  | 6  | 876892  | 876922  | emrB | 1.1445E-10 | 8.57904E-08 |
| rs44  | kmer11335474 | ATCACGGATAACACCGCGTAGGCGTGCAGAAA | 11  | 6  | 876912  | 876942  | emrB | 1.1445E-10 | 8.57904E-08 |
| rs44  | kmer11698312 | ATCCGTGATAGCGACCGCGCTAGTGGTCTCG  | 11  | 6  | 876917  | 876890  | emrB | 1.1445E-10 | 8.57904E-08 |
| rs44  | kmer12431661 | ATGACCTTTCGACGCGCTACGCGGTGGTATC  | 11  | 6  | 876948  | 876919  | emrB | 1.1445E-10 | 8.57904E-08 |
| rs44  | kmer15366074 | CACGCCTACGCGGTGGTATCCGTGATAGCGA  | 11  | 6  | 876937  | 876907  | emrB | 1.1445E-10 | 8.57904E-08 |
| rs44  | kmer15421468 | CACGGATACACCGCGTAGGCGTGCAGAAAGG  | 11  | 6  | 876914  | 876944  | emrB | 1.1445E-10 | 8.57904E-08 |
| rs44  | kmer15558693 | CACTAGCGCGGTGCCTATCACGGATAACACC  | 11  | 6  | 876896  | 876926  | emrB | 1.1445E-10 | 8.57904E-08 |
| rs44  | kmer17764184 | CCACTAGCGCGGTGCCTATCACGGATAACACC | 11  | 6  | 876895  | 876925  | emrB | 1.1445E-10 | 8.57904E-08 |
| rs44  | kmer20634591 | CCGTGATAGCGACCGCGCTAGTGGTCTCGAC  | 11  | 6  | 876917  | 876888  | emrB | 1.1445E-10 | 8.57904E-08 |
| rs44  | kmer20761444 | CCTACGCGGTGGTATCCGTGATAGCGACCGC  | 11  | 6  | 876933  | 876903  | emrB | 1.1445E-10 | 8.57904E-08 |
| rs44  | kmer22695473 | CGCACGCCTACGCGGTGGTATCCGTGATAGC  | 11  | 6  | 876939  | 876909  | emrB | 1.1445E-10 | 8.57904E-08 |
| rs44  | kmer23238193 | CGCCTACGCGGTGGTATCCGTGATAGCGACC  | 11  | 6  | 876935  | 876905  | emrB | 1.1445E-10 | 8.57904E-08 |
| rs44  | kmer23689079 | CGCGGTGGTATCCGTGATAGCGACCGCGCTA  | 11  | 6  | 876929  | 876899  | emrB | 1.1445E-10 | 8.57904E-08 |

SuppTableS1\_kmer

|       |              |                                  |     |    |         |         |                |             |             |
|-------|--------------|----------------------------------|-----|----|---------|---------|----------------|-------------|-------------|
| rs44  | kmer23772176 | CGCTATCACGGATAACCACCGCGTAGGCGTGC | 11  | 6  | 876908  | 876938  | <i>emrB</i>    | 1.1445E-10  | 8.57904E-08 |
| rs44  | kmer24128006 | CGGATAACCACCGCGTAGGCGTGCGAAAGGTC | 11  | 6  | 876916  | 876946  | <i>emrB</i>    | 1.1445E-10  | 8.57904E-08 |
| rs44  | kmer25004663 | CGGTCGCTATCACGGATAACCACCGCGTAGGC | 11  | 6  | 876904  | 876934  | <i>emrB</i>    | 1.1445E-10  | 8.57904E-08 |
| rs44  | kmer26033219 | CTACGCGGTGGTATCCGTGATAGCGACCGCG  | 11  | 6  | 876932  | 876902  | <i>emrB</i>    | 1.1445E-10  | 8.57904E-08 |
| rs44  | kmer26082868 | CTAGCGCGGTGCTATCACGGATAACCACCGC  | 11  | 6  | 876898  | 876928  | <i>emrB</i>    | 1.1445E-10  | 8.57904E-08 |
| rs44  | kmer26121921 | CTATCACGGATAACCACCGCGTAGGCGTGCGA | 11  | 6  | 876910  | 876940  | <i>emrB</i>    | 1.1445E-10  | 8.57904E-08 |
| rs44  | kmer28331985 | CITTCGCACGCCTACGCGGTGGTATCCGTGA  | 11  | 6  | 876943  | 876913  | <i>emrB</i>    | 1.1445E-10  | 8.57904E-08 |
| rs44  | kmer28797794 | GACCACTAGCGCGGTGCTATCACGGATAACC  | 11  | 6  | 876893  | 876923  | <i>emrB</i>    | 1.1445E-10  | 8.57904E-08 |
| rs44  | kmer32254668 | TACGCGGTGGTATCCGTGATAGCGACCGCGC  | 11  | 6  | 876931  | 876901  | <i>emrB</i>    | 1.1445E-10  | 8.57904E-08 |
| rs44  | kmer32661995 | TATCACGGATAACCACCGCGTAGGCGTGCGAA | 11  | 6  | 876911  | 876941  | <i>emrB</i>    | 1.1445E-10  | 8.57904E-08 |
| rs44  | kmer32692745 | TATCCGTGATAGCGACCGCGTAGTGGTCTC   | 11  | 6  | 876921  | 876891  | <i>emrB</i>    | 1.1445E-10  | 8.57904E-08 |
| rs44  | kmer33827064 | TCCGTGATAGCGACCGCGTAGTGGTCTCGA   | 11  | 6  | 876917  | 876889  | <i>emrB</i>    | 1.1445E-10  | 8.57904E-08 |
| rs44  | kmer35191025 | TGACCTTTCGCACGCCTACGCGGTGGTATCC  | 11  | 6  | 876947  | 876919  | <i>emrB</i>    | 1.1445E-10  | 8.57904E-08 |
| rs71  | kmer4593341  | ACCACCCCGGAACGGCTGCGGTCTCTGGAAC  | 306 | 9  | 1789743 | 1789713 | <i>Rv1588c</i> | 1.14449E-10 | 8.579E-08   |
| rs71  | kmer17623994 | CCACCCCGGAACGGCTGCGGTCTCTGGAACG  | 306 | 9  | 1789742 | 1789712 | <i>Rv1588c</i> | 1.14449E-10 | 8.579E-08   |
| rs71  | kmer33483815 | TCCAGAGACCGCAGCCGTTCGGGGTGGTCA   | 306 | 9  | 1789715 | 1789745 | <i>Rv1588c</i> | 1.14449E-10 | 8.579E-08   |
| rs71  | kmer36730610 | TTCCAGAGACCGCAGCCGTTCGGGGTGGTCT  | 306 | 9  | 1789714 | 1789744 | <i>Rv1588c</i> | 1.14449E-10 | 8.579E-08   |
| rs186 | kmer2219604  | AAGCCATTGCGTACCGCGTCTCGGCCGTCT   | 316 | 13 | 2288790 | 2288820 | <i>pncA</i>    | 4.45749E-07 | 4.43668E-07 |
| rs186 | kmer5094323  | ACCGATCATTGTGTGCGCCAGACGGCCGAGG  | 316 | 13 | 2288839 | 2288809 | <i>pncA</i>    | 4.45749E-07 | 4.43668E-07 |
| rs186 | kmer5216775  | ACCGCGTCTCGGCCGTCTGGCGCACACAAT   | 316 | 13 | 2288802 | 2288832 | <i>pncA</i>    | 4.45749E-07 | 4.43668E-07 |
| rs186 | kmer8474231  | AGCCATTGCGTACCGCGTCTCGGCCGTCTG   | 316 | 13 | 2288791 | 2288821 | <i>pncA</i>    | 4.45749E-07 | 4.43668E-07 |
| rs186 | kmer11493018 | ATCATTGTGTGCGCCAGACGGCCGAGGACGC  | 316 | 13 | 2288835 | 2288805 | <i>pncA</i>    | 4.45749E-07 | 4.43668E-07 |
| rs186 | kmer13651897 | ATTGCCACCGATCATTGTGTGCGCCAGACGG  | 316 | 13 | 2288845 | 2288815 | <i>pncA</i>    | 4.45749E-07 | 4.43668E-07 |
| rs186 | kmer13674656 | ATTGCGTACCGCGTCTCGGCCGTCTGGCGC   | 316 | 13 | 2288795 | 2288825 | <i>pncA</i>    | 4.45749E-07 | 4.43668E-07 |
| rs186 | kmer15064723 | CACCGATCATTGTGTGCGCCAGACGGCCGAG  | 316 | 13 | 2288840 | 2288810 | <i>pncA</i>    | 4.45749E-07 | 4.43668E-07 |
| rs186 | kmer17348098 | CATTGCGTACCGCGTCTCGGCCGTCTGGCGC  | 316 | 13 | 2288794 | 2288824 | <i>pncA</i>    | 4.45749E-07 | 4.43668E-07 |
| rs186 | kmer17365166 | CATTGTGTGCGCCAGACGGCCGAGGACCGCG  | 316 | 13 | 2288833 | 2288803 | <i>pncA</i>    | 4.45749E-07 | 4.43668E-07 |
| rs186 | kmer17641470 | CCACCGATCATTGTGTGCGCCAGACGGCCGA  | 316 | 13 | 2288841 | 2288811 | <i>pncA</i>    | 4.45749E-07 | 4.43668E-07 |
| rs186 | kmer17814934 | CCAGACGGCCGAGGACGCGGTACGCAATGGC  | 316 | 13 | 2288822 | 2288792 | <i>pncA</i>    | 4.45749E-07 | 4.43668E-07 |
| rs186 | kmer18214397 | CCATTGCGTACCGCGTCTCGGCCGTCTGGC   | 316 | 13 | 2288793 | 2288823 | <i>pncA</i>    | 4.45749E-07 | 4.43668E-07 |
| rs186 | kmer19477140 | CCGATCATTGTGTGCGCCAGACGGCCGAGGA  | 316 | 13 | 2288838 | 2288808 | <i>pncA</i>    | 4.45749E-07 | 4.43668E-07 |
| rs186 | kmer22435194 | CGATCATTGTGTGCGCCAGACGGCCGAGGAC  | 316 | 13 | 2288837 | 2288807 | <i>pncA</i>    | 4.45749E-07 | 4.43668E-07 |
| rs186 | kmer23711999 | CGCGTCTCGGCCGTCTGGCGCACACAATGA   | 316 | 13 | 2288804 | 2288834 | <i>pncA</i>    | 4.45749E-07 | 4.43668E-07 |
| rs186 | kmer24364303 | CGGCCGTCTGGCGCACACAATGATCGGTGGC  | 316 | 13 | 2288812 | 2288842 | <i>pncA</i>    | 4.45749E-07 | 4.43668E-07 |
| rs186 | kmer25186320 | CGTACCGCGTCTCGGCCGTCTGGCGCACAC   | 316 | 13 | 2288799 | 2288829 | <i>pncA</i>    | 4.45749E-07 | 4.43668E-07 |
| rs186 | kmer25366455 | CGTCTCGGCCGTCTGGCGCACACAATGATC   | 316 | 13 | 2288806 | 2288836 | <i>pncA</i>    | 4.45749E-07 | 4.43668E-07 |
| rs186 | kmer25566175 | CGTCTGGCGCACACAATGATCGGTGGCAATA  | 316 | 13 | 2288816 | 2288846 | <i>pncA</i>    | 4.45749E-07 | 4.43668E-07 |
| rs186 | kmer27564532 | CTGGCGCACACAATGATCGGTGGCAATCCG   | 316 | 13 | 2288819 | 2288849 | <i>pncA</i>    | 4.45749E-07 | 4.43668E-07 |
| rs186 | kmer31367114 | GTATTGCCACCGATCATTGTGTGCGCCAGAC  | 316 | 13 | 2288847 | 2288817 | <i>pncA</i>    | 4.45749E-07 | 4.43668E-07 |
| rs186 | kmer32181818 | TACCGGTCTCGGCCGTCTGGCGCACACAA    | 316 | 13 | 2288801 | 2288831 | <i>pncA</i>    | 4.45749E-07 | 4.43668E-07 |
| rs186 | kmer34524664 | TCGGTATTGCCACCGATCATTGTGTGCGCCA  | 316 | 13 | 2288850 | 2288820 | <i>pncA</i>    | 4.45749E-07 | 4.43668E-07 |
| rs186 | kmer34921438 | TCTGGCGCACACAATGATCGGTGGCAATACC  | 316 | 13 | 2288818 | 2288848 | <i>pncA</i>    | 4.45749E-07 | 4.43668E-07 |
| rs186 | kmer35488990 | TGCCACCGATCATTGTGTGCGCCAGACGGCC  | 316 | 13 | 2288843 | 2288813 | <i>pncA</i>    | 4.45749E-07 | 4.43668E-07 |
| rs186 | kmer35715110 | TGCGTACCGCGTCTCGGCCGTCTGGCGCAC   | 316 | 13 | 2288797 | 2288827 | <i>pncA</i>    | 4.45749E-07 | 4.43668E-07 |
| rs186 | kmer36278116 | TGTGCGCCAGACGGCCGAGGACGCGGTACGC  | 316 | 13 | 2288828 | 2288798 | <i>pncA</i>    | 4.45749E-07 | 4.43668E-07 |
| rs186 | kmer36306019 | TGTGTGCGCCAGACGGCCGAGGACGCGGTAC  | 316 | 13 | 2288830 | 2288800 | <i>pncA</i>    | 4.45749E-07 | 4.43668E-07 |
| rs186 | kmer37127475 | TTGCCACCGATCATTGTGTGCGCCAGACGGC  | 316 | 13 | 2288844 | 2288814 | <i>pncA</i>    | 4.45749E-07 | 4.43668E-07 |

SuppTableS1\_kmer

|                                         |              |                                  |     |    |         |         |               |             |             |
|-----------------------------------------|--------------|----------------------------------|-----|----|---------|---------|---------------|-------------|-------------|
| rs186                                   | kmer37168389 | TTGCGTACCGCGTCTCGGCCGTCTGGCGCA   | 316 | 13 | 2288796 | 2288826 | <i>pncA</i>   | 4.45749E-07 | 4.43668E-07 |
| <b>KwaZulu-Natal's study population</b> |              |                                  |     |    |         |         |               |             |             |
| rs18                                    | kmer26323394 | CTGGCTGCCAGCGAGCTCATCGCCCGGACC   | 47  | 52 | 1340230 | 1340203 | <i>PPE18</i>  | 1.71063E-37 | 2.99814E-08 |
| rs18                                    | kmer28929848 | GGTGCCAGCGAGCTCATCGCCCGGACCCC    | 47  | 52 | 1340230 | 1340201 | <i>PPE18</i>  | 1.71063E-37 | 2.99814E-08 |
| rs18                                    | kmer33862222 | TGGTGCCAGCGAGCTCATCGCCCGGACCC    | 47  | 52 | 1340230 | 1340202 | <i>PPE18</i>  | 1.71063E-37 | 2.99814E-08 |
| rs18                                    | kmer28784798 | GCTGGTGCCAGCGAGCTCATCGCCCGGAC    | 47  | 52 | 1532751 | 1532781 | <i>PPE19</i>  | 1.71063E-37 | 2.99814E-08 |
| rs18                                    | kmer11068324 | AGCTGGTGCCAGCGAGCTCATCGCCCGGA    | 47  | 52 | 1532750 | 1532780 | <i>PPE19</i>  | 1.71063E-37 | 2.99814E-08 |
| rs18                                    | kmer20785593 | CCAGCTGGTGCCAGCGAGCTCATCGCCCG    | 47  | 52 | 3895311 | 3895282 | <i>PPE60*</i> | 1.71063E-37 | 2.99814E-08 |
| rs18                                    | kmer19137052 | CAGCTGGTGCCAGCGAGCTCATCGCCCGG    | 47  | 52 | 3895310 | 3895282 | <i>PPE60</i>  | 1.71063E-37 | 2.99814E-08 |
| rs18                                    | kmer24462647 | CGGTGCGGCGCAGTTCAGTAGATGCCGGTCC  | 47  | 52 | 4408043 | 4408068 | <i>gid</i>    | 1.71063E-37 | 2.99814E-08 |
| rs18                                    | kmer7656521  | ACCGCATCTACTGAACTGCGCCGACCGAG    | 47  | 52 | 4408066 | 4408043 | <i>gid</i>    | 1.71063E-37 | 2.99814E-08 |
| rs18                                    | kmer30275354 | TACTGAACTGCGCCGACCGAGTTTCTTCGA   | 47  | 52 | 4407921 | 4407897 | <i>gid</i>    | 1.71063E-37 | 2.99814E-08 |
| rs18                                    | kmer25941220 | CTGAACTGCGCCGACCGAGTTTCTTCGAGA   | 47  | 52 | 4407921 | 4407895 | <i>gid</i>    | 1.71063E-37 | 2.99814E-08 |
| rs18                                    | kmer32806171 | TCTCTGAAGAACTCGGTGCGGCGCAGTTC    | 47  | 52 | 4407893 | 4407921 | <i>gid</i>    | 1.71063E-37 | 2.99814E-08 |
| rs18                                    | kmer33875223 | TGGGACCGGCATCTACTGAACTGCGCCGAC   | 47  | 52 | 4408070 | 4408043 | <i>gid</i>    | 1.71063E-37 | 2.99814E-08 |
| rs18                                    | kmer32536711 | TCGGTGCGGCGCAGTTCAGTAGATGCCGGTCC | 47  | 52 | 4408043 | 4408067 | <i>gid</i>    | 1.71063E-37 | 2.99814E-08 |
| rs18                                    | kmer3113753  | AACTGCGCCGACCGAGTTTCTTCGAGAGAT   | 47  | 52 | 4407921 | 4407892 | <i>gid</i>    | 1.71063E-37 | 2.99814E-08 |
| rs18                                    | kmer25839097 | CTCTCGAAGAACTCGGTGCGGCGCAGTTC    | 47  | 52 | 4407894 | 4407921 | <i>gid</i>    | 1.71063E-37 | 2.99814E-08 |
| rs18                                    | kmer25215189 | CTACTGAACTGCGCCGACCGAGTTTCTTCG   | 47  | 52 | 4407921 | 4407898 | <i>gid</i>    | 1.71063E-37 | 2.99814E-08 |
| rs18                                    | kmer28948245 | GGTGCGGCGCAGTTCAGTAGATGCCGGTCC   | 47  | 52 | 4408043 | 4408069 | <i>gid</i>    | 1.71063E-37 | 2.99814E-08 |
| rs18                                    | kmer3071807  | AACTCGGTGCGGCGCAGTTCAGTAGATGCC   | 47  | 52 | 4408043 | 4408064 | <i>gid</i>    | 1.71063E-37 | 2.99814E-08 |
| rs18                                    | kmer8983053  | ACTCGGTGCGGCGCAGTTCAGTAGATGCC    | 47  | 52 | 4408043 | 4408065 | <i>gid</i>    | 1.71063E-37 | 2.99814E-08 |
| rs18                                    | kmer32691685 | TCTACTGAACTGCGCCGACCGAGTTTCTTC   | 47  | 52 | 4407921 | 4407899 | <i>gid</i>    | 1.71063E-37 | 2.99814E-08 |
| rs18                                    | kmer27350510 | GAAACTCGGTGCGGCGCAGTTCAGTAGATGC  | 47  | 52 | 4407902 | 4407921 | <i>gid</i>    | 1.71063E-37 | 2.99814E-08 |
| rs18                                    | kmer3272659  | AAGAAACTCGGTGCGGCGCAGTTCAGTAGAT  | 47  | 52 | 4407900 | 4407921 | <i>gid</i>    | 1.71063E-37 | 2.99814E-08 |
| rs18                                    | kmer9033433  | ACTGAACTGCGCCGACCGAGTTTCTTCGAG   | 47  | 52 | 4407921 | 4407896 | <i>gid</i>    | 1.71063E-37 | 2.99814E-08 |
| rs18                                    | kmer9522910  | AGAAACTCGGTGCGGCGCAGTTCAGTAGATG  | 47  | 52 | 4407901 | 4407921 | <i>gid</i>    | 1.71063E-37 | 2.99814E-08 |
| rs18                                    | kmer15334460 | ATGGGACCGGCATCTACTGAACTGCGCCGCA  | 47  | 52 | 4408071 | 4408043 | <i>gid</i>    | 1.71063E-37 | 2.99814E-08 |
| rs18                                    | kmer1051894  | AAACTCGGTGCGGCGCAGTTCAGTAGATGCC  | 47  | 52 | 4408043 | 4408063 | <i>gid</i>    | 1.71063E-37 | 2.99814E-08 |
| rs18                                    | kmer31029355 | TATGGGACCGGCATCTACTGAACTGCGCCCG  | 47  | 52 | 4408072 | 4408043 | <i>gid</i>    | 1.71063E-37 | 2.99814E-08 |
| rs35                                    | kmer10995207 | AGTCCTCGAACGCGGTGACCGGGTCTGTGA   | 232 | 4  | 4408033 | 4408003 | <i>gid</i>    | 3.98215E-36 | 7.80205E-07 |
| rs35                                    | kmer29121848 | GTGATCGGTGAGCTCCTCGAACGCGGTGACC  | 232 | 4  | 4408043 | 4408013 | <i>gid</i>    | 3.98215E-36 | 7.80205E-07 |
| rs35                                    | kmer19844985 | CATCTACTGAACTGCGCCGTGATCGGTGAGC  | 232 | 4  | 4408061 | 4408031 | <i>gid</i>    | 3.98215E-36 | 7.80205E-07 |
| rs35                                    | kmer25467783 | CTCACCGATCACGGCGCAGTTCAGTAGATGC  | 232 | 4  | 4408032 | 4408062 | <i>gid</i>    | 3.98215E-36 | 7.80205E-07 |
| rs35                                    | kmer14422788 | ATCTACTGAACTGCGCCGTGATCGGTGAGCT  | 232 | 4  | 4408060 | 4408030 | <i>gid</i>    | 3.98215E-36 | 7.80205E-07 |
| rs35                                    | kmer25217263 | CTACTGCGCCGACCGAGTTTCTTCGAGAGA   | 232 | 4  | 4407923 | 4407893 | <i>gid</i>    | 3.98215E-36 | 7.80205E-07 |
| rs35                                    | kmer32300297 | TCGAGGAGCTCACCGATCACGGCGCAGTTC   | 232 | 4  | 4408024 | 4408054 | <i>gid</i>    | 3.98215E-36 | 7.80205E-07 |
| rs35                                    | kmer8444806  | ACGGCGCAGTTCAGTAGATGCCCGTCCATA   | 232 | 4  | 4408042 | 4408072 | <i>gid</i>    | 3.98215E-36 | 7.80205E-07 |
| rs35                                    | kmer24450176 | CGGTGAGCTCCTCGAACGCGGTGACCGGGTCC | 232 | 4  | 4408038 | 4408008 | <i>gid</i>    | 3.98215E-36 | 7.80205E-07 |
| rs35                                    | kmer17468766 | CAACCCGGTCCGCTACCGATATCCACGACC   | 232 | 4  | 4407981 | 4408011 | <i>gid</i>    | 3.98215E-36 | 7.80205E-07 |
| rs35                                    | kmer18359953 | CACCGATCACGGCGCAGTTCAGTAGATGCC   | 232 | 4  | 4408034 | 4408064 | <i>gid</i>    | 3.98215E-36 | 7.80205E-07 |
| rs35                                    | kmer2832637  | AACGCGGTGACCGGGTCTGTGATATCGGTAG  | 232 | 4  | 4408024 | 4407994 | <i>gid</i>    | 3.98215E-36 | 7.80205E-07 |
| rs35                                    | kmer25941222 | CTGAACTGCGCCGTGATCGGTGAGCTCCTCG  | 232 | 4  | 4408055 | 4408025 | <i>gid</i>    | 3.98215E-36 | 7.80205E-07 |
| rs35                                    | kmer33211610 | TGACCGGGTCTGTGATATCGGTAGCGGAGCC  | 232 | 4  | 4408017 | 4407987 | <i>gid</i>    | 3.98215E-36 | 7.80205E-07 |
| rs35                                    | kmer28724483 | GCTCCGCTACCGATATCCACGACCGGTAC    | 232 | 4  | 4407988 | 4408018 | <i>gid</i>    | 3.98215E-36 | 7.80205E-07 |
| rs35                                    | kmer24416774 | CGGTACCGCGTTCGAGGAGCTCACCGATCA   | 232 | 4  | 4408012 | 4408042 | <i>gid</i>    | 3.98215E-36 | 7.80205E-07 |
| rs35                                    | kmer9094311  | ACTGCGCCGTGATCGGTGAGCTCCTCGAACG  | 232 | 4  | 4408051 | 4408021 | <i>gid</i>    | 3.98215E-36 | 7.80205E-07 |

SuppTableS1\_kmer

|      |              |                                  |     |   |         |         |     |             |             |
|------|--------------|----------------------------------|-----|---|---------|---------|-----|-------------|-------------|
| rs35 | kmer13272568 | ATATCCACGACCCGGTACCCGCTTCGAGGA   | 232 | 4 | 4408000 | 4408030 | gid | 3.98215E-36 | 7.80205E-07 |
| rs35 | kmer13675032 | ATCACGGCGCAGTTCAGTAGATGCCGGTCCC  | 232 | 4 | 4408039 | 4408069 | gid | 3.98215E-36 | 7.80205E-07 |
| rs35 | kmer21854857 | CCGCGTTCGAGGAGCTCACCGATCACGGCGC  | 232 | 4 | 4408018 | 4408048 | gid | 3.98215E-36 | 7.80205E-07 |
| rs35 | kmer23207533 | CGATCACGGCGCAGTTCAGTAGATGCCGGTCC | 232 | 4 | 4408037 | 4408067 | gid | 3.98215E-36 | 7.80205E-07 |
| rs35 | kmer2579962  | AACCCGGTCCGCTACCGATATCCACGACCC   | 232 | 4 | 4407982 | 4408012 | gid | 3.98215E-36 | 7.80205E-07 |
| rs35 | kmer24447073 | CGGTGACCCGGTCTGGATATCGGTAGCGGA   | 232 | 4 | 4408020 | 4407990 | gid | 3.98215E-36 | 7.80205E-07 |
| rs35 | kmer22052563 | CCGGTACCCGCTTCGAGGAGCTCACCGATC   | 232 | 4 | 4408011 | 4408041 | gid | 3.98215E-36 | 7.80205E-07 |
| rs35 | kmer9033434  | ACTGAACTGCGCCGTGATCGGTGAGCTCCTC  | 232 | 4 | 4408056 | 4408026 | gid | 3.98215E-36 | 7.80205E-07 |
| rs35 | kmer20624967 | CCACGACCCGGTACCCGCTTCGAGGAGCTC   | 232 | 4 | 4408004 | 4408034 | gid | 3.98215E-36 | 7.80205E-07 |
| rs35 | kmer18475391 | CACGACCCGGTACCCGCTTCGAGGAGCTCA   | 232 | 4 | 4408005 | 4408035 | gid | 3.98215E-36 | 7.80205E-07 |
| rs35 | kmer25651697 | CTCCTCGAACGCGGTGACCCGGTCTGGATA   | 232 | 4 | 4408031 | 4408001 | gid | 3.98215E-36 | 7.80205E-07 |
| rs35 | kmer23823071 | CGCTACCGATATCCACGACCCGGTACCCGCG  | 232 | 4 | 4407992 | 4408022 | gid | 3.98215E-36 | 7.80205E-07 |
| rs35 | kmer13887590 | ATCCACGACCCGGTACCCGCTTCGAGGAGC   | 232 | 4 | 4408002 | 4408032 | gid | 3.98215E-36 | 7.80205E-07 |
| rs35 | kmer24775424 | CGTGATCGGTGAGCTCCTCGAACGCGGTGAC  | 232 | 4 | 4408044 | 4408014 | gid | 3.98215E-36 | 7.80205E-07 |
| rs35 | kmer18379647 | CACCGCTTCGAGGAGCTCACCGATCACGGC   | 232 | 4 | 4408016 | 4408046 | gid | 3.98215E-36 | 7.80205E-07 |
| rs35 | kmer21860509 | CCGCTACTGCGCCGACCCGAGTTTCTCGAG   | 232 | 4 | 4407926 | 4407896 | gid | 3.98215E-36 | 7.80205E-07 |
| rs35 | kmer3113816  | AACTGCGCCGTGATCGGTGAGCTCCTCGAAC  | 232 | 4 | 4408052 | 4408022 | gid | 3.98215E-36 | 7.80205E-07 |
| rs35 | kmer22157426 | CCGTGATCGGTGAGCTCCTCGAACGCGGTGA  | 232 | 4 | 4408045 | 4408015 | gid | 3.98215E-36 | 7.80205E-07 |
| rs35 | kmer25682750 | CTCGAACGCGGTGACCCGGTCTGGATATCG   | 232 | 4 | 4408028 | 4407998 | gid | 3.98215E-36 | 7.80205E-07 |
| rs35 | kmer22364440 | CCTCGAACGCGGTGACCCGGTCTGGATATC   | 232 | 4 | 4408029 | 4407999 | gid | 3.98215E-36 | 7.80205E-07 |
| rs35 | kmer8305557  | ACGCGGTGACCCGGTCTGGATATCGGTAGC   | 232 | 4 | 4408023 | 4407993 | gid | 3.98215E-36 | 7.80205E-07 |
| rs35 | kmer7656522  | ACCGCATCTACTGAACTGCGCCGTGATCGG   | 232 | 4 | 4408066 | 4408036 | gid | 3.98215E-36 | 7.80205E-07 |
| rs35 | kmer7472264  | ACCCGGTCCGCTACCGATATCCACGACCCG   | 232 | 4 | 4407983 | 4408013 | gid | 3.98215E-36 | 7.80205E-07 |
| rs35 | kmer24255661 | CGGCTCCGCTACCGATATCCACGACCCGGT   | 232 | 4 | 4407986 | 4408016 | gid | 3.98215E-36 | 7.80205E-07 |
| rs35 | kmer30094335 | TACCGATATCCACGACCCGGTACCCGCTTC   | 232 | 4 | 4407995 | 4408025 | gid | 3.98215E-36 | 7.80205E-07 |
| rs35 | kmer28200671 | GCAACCCGGTCCGCTACCGATATCCACGAC   | 232 | 4 | 4407980 | 4408010 | gid | 3.98215E-36 | 7.80205E-07 |
| rs35 | kmer21386852 | CCCGCTCCGCTACCGATATCCACGACCCGG   | 232 | 4 | 4407984 | 4408014 | gid | 3.98215E-36 | 7.80205E-07 |
| rs35 | kmer22960879 | CGACCCGGTACCCGCTTCGAGGAGCTCAC    | 232 | 4 | 4408007 | 4408037 | gid | 3.98215E-36 | 7.80205E-07 |
| rs35 | kmer7557963  | ACCGATCACGGCGCAGTTCAGTAGATGCCGG  | 232 | 4 | 4408035 | 4408065 | gid | 3.98215E-36 | 7.80205E-07 |
| rs35 | kmer7556618  | ACCGATATCCACGACCCGGTACCCGCTTC    | 232 | 4 | 4407996 | 4408026 | gid | 3.98215E-36 | 7.80205E-07 |
| rs35 | kmer25215190 | CTACTGAACTGCGCCGTGATCGGTGAGCTCC  | 232 | 4 | 4408058 | 4408028 | gid | 3.98215E-36 | 7.80205E-07 |
| rs35 | kmer21859301 | CCGCTACCGATATCCACGACCCGGTACCCGC  | 232 | 4 | 4407991 | 4408021 | gid | 3.98215E-36 | 7.80205E-07 |
| rs35 | kmer32691686 | TCTACTGAACTGCGCCGTGATCGGTGAGCTC  | 232 | 4 | 4408059 | 4408029 | gid | 3.98215E-36 | 7.80205E-07 |
| rs35 | kmer8028042  | ACGACCCGGTACCCGCTTCGAGGAGCTCAC   | 232 | 4 | 4408006 | 4408036 | gid | 3.98215E-36 | 7.80205E-07 |
| rs35 | kmer31517767 | TCACGGCGCAGTTCAGTAGATGCCGGTCCCA  | 232 | 4 | 4408040 | 4408070 | gid | 3.98215E-36 | 7.80205E-07 |
| rs35 | kmer7623096  | ACCCGCTTCGAGGAGCTCACCGATCACGGCG  | 232 | 4 | 4408017 | 4408047 | gid | 3.98215E-36 | 7.80205E-07 |
| rs35 | kmer25839096 | CTCTCGAAGAACTCGGTGCGGGCAGTAGC    | 232 | 4 | 4407894 | 4407924 | gid | 3.98215E-36 | 7.80205E-07 |
| rs35 | kmer14316614 | ATCGGTGAGCTCCTCGAACGCGGTGACCCGG  | 232 | 4 | 4408040 | 4408010 | gid | 3.98215E-36 | 7.80205E-07 |
| rs35 | kmer11276695 | AGGAGCTCACCGATCACGGCGCAGTTCAGTA  | 232 | 4 | 4408027 | 4408057 | gid | 3.98215E-36 | 7.80205E-07 |
| rs35 | kmer7475958  | ACCCGGTACCCGCTTCGAGGAGCTCACCGA   | 232 | 4 | 4408009 | 4408039 | gid | 3.98215E-36 | 7.80205E-07 |
| rs35 | kmer23809121 | CGCGTTCGAGGAGCTCACCGATCACGGCGCA  | 232 | 4 | 4408019 | 4408049 | gid | 3.98215E-36 | 7.80205E-07 |
| rs35 | kmer34975438 | TTCGAGGAGCTCACCGATCACGGCGCAGTTC  | 232 | 4 | 4408023 | 4408053 | gid | 3.98215E-36 | 7.80205E-07 |
| rs35 | kmer31486866 | TCACCGATCACGGCGCAGTTCAGTAGATGCC  | 232 | 4 | 4408033 | 4408063 | gid | 3.98215E-36 | 7.80205E-07 |
| rs35 | kmer26159179 | CTGCGCCGTGATCGGTGAGCTCCTCGAACGC  | 232 | 4 | 4408050 | 4408020 | gid | 3.98215E-36 | 7.80205E-07 |
| rs35 | kmer21649742 | CCGATATCCACGACCCGGTACCCGCTTCGA   | 232 | 4 | 4407997 | 4408027 | gid | 3.98215E-36 | 7.80205E-07 |
| rs35 | kmer27995034 | GATCACGGCGCAGTTCAGTAGATGCCGGTCC  | 232 | 4 | 4408038 | 4408068 | gid | 3.98215E-36 | 7.80205E-07 |
| rs35 | kmer25624087 | CTCCGCTACCGATATCCACGACCCGGTACCC  | 232 | 4 | 4407989 | 4408019 | gid | 3.98215E-36 | 7.80205E-07 |

SuppTableS1\_kmer



|      |              |                                   |     |    |         |         |      |             |             |
|------|--------------|-----------------------------------|-----|----|---------|---------|------|-------------|-------------|
| rs35 | kmer7683239  | ACCGGGTCGTGGATATCGGTAGCGGAGCCGG   | 232 | 4  | 4408015 | 4407985 | gid  | 3.98215E-36 | 7.80205E-07 |
| rs35 | kmer14489606 | ATCTCTCGAAGAACTCGGTGCGGCGCAGTA    | 232 | 4  | 4407892 | 4407922 | gid  | 3.98215E-36 | 7.80205E-07 |
| rs35 | kmer15334461 | ATGGGACCGGCATCTACTGAACTGCGCCGTG   | 232 | 4  | 4408071 | 4408041 | gid  | 3.98215E-36 | 7.80205E-07 |
| rs35 | kmer23826036 | CGTACTGCGCCGACCCGAGTTTCTTCGAGA    | 232 | 4  | 4407925 | 4407895 | gid  | 3.98215E-36 | 7.80205E-07 |
| rs56 | kmer32611629 | TCGTGGATATCGGTAGCGGAGCCGGGTTGCC   | 231 | 4  | 4408009 | 4407979 | gid  | 1.79671E-35 | 3.74798E-06 |
| rs56 | kmer24812225 | CGTGGATATCGGTAGCGGAGCCGGGTTGCCG   | 231 | 4  | 4408008 | 4407978 | gid  | 1.79671E-35 | 3.74798E-06 |
| rs56 | kmer18512612 | CACGCCCGGCAACCCGGCTCCGCTACCGATA   | 231 | 4  | 4407972 | 4408002 | gid  | 1.79671E-35 | 3.74798E-06 |
| rs56 | kmer21945093 | CCGGCAACCCGGCTCCGCTACCGATATCCAC   | 231 | 4  | 4407977 | 4408007 | gid  | 1.79671E-35 | 3.74798E-06 |
| rs56 | kmer21374479 | CCCGGCAACCCGGCTCCGCTACCGATATCCA   | 231 | 4  | 4407976 | 4408006 | gid  | 1.79671E-35 | 3.74798E-06 |
| rs56 | kmer23558993 | CGCCCGGCAACCCGGCTCCGCTACCGATATC   | 231 | 4  | 4407974 | 4408004 | gid  | 1.79671E-35 | 3.74798E-06 |
| rs56 | kmer15275280 | ATGGCACGCCCGCAACCCGGCTCCGCTACC    | 231 | 4  | 4407968 | 4407998 | gid  | 1.79671E-35 | 3.74798E-06 |
| rs56 | kmer28445897 | GCCCGGCAACCCGGCTCCGCTACCGATATCC   | 231 | 4  | 4407975 | 4408005 | gid  | 1.79671E-35 | 3.74798E-06 |
| rs56 | kmer8241944  | ACGCCCGGCAACCCGGCTCCGCTACCGATAT   | 231 | 4  | 4407973 | 4408003 | gid  | 1.79671E-35 | 3.74798E-06 |
| rs56 | kmer24402640 | CGGTAGCGGAGCCGGTTGCCGGGCGTGCCA    | 231 | 4  | 4407999 | 4407969 | gid  | 1.79671E-35 | 3.74798E-06 |
| rs56 | kmer14310967 | ATCGGTAGCGGAGCCGGGTTGCCGGGCGTGCC  | 231 | 4  | 4408001 | 4407971 | gid  | 1.79671E-35 | 3.74798E-06 |
| rs56 | kmer32526264 | TCGGTAGCGGAGCCGGGTTGCCGGGCGTGCC   | 231 | 4  | 4408000 | 4407970 | gid  | 1.79671E-35 | 3.74798E-06 |
| rs34 | kmer33461786 | TGCAGTAGCTATGATTCGCTGTGATTGAAC    | 49  | 52 | 877049  | 877079  | emrB | 3.98216E-36 | 7.80206E-07 |
| rs34 | kmer19030115 | CAGCGAAATCATAGCTACTGCAAAGAAAGTC   | 49  | 52 | 877070  | 877040  | emrB | 3.98216E-36 | 7.80206E-07 |
| rs34 | kmer34722663 | TTCAATCACAGCGAAATCATAGCTACTGCAA   | 49  | 52 | 877078  | 877048  | emrB | 3.98216E-36 | 7.80206E-07 |
| rs34 | kmer19343715 | CAGTAGCTATGATTCGCTGTGATTGAAC TG   | 49  | 52 | 877051  | 877081  | emrB | 3.98216E-36 | 7.80206E-07 |
| rs34 | kmer31413181 | TCAATCACAGCGAAATCATAGCTACTGCAA    | 49  | 52 | 877077  | 877047  | emrB | 3.98216E-36 | 7.80206E-07 |
| rs34 | kmer11852961 | AGTAGCTATGATTCGCTGTGATTGAAC TG    | 49  | 52 | 877052  | 877082  | emrB | 3.98216E-36 | 7.80206E-07 |
| rs34 | kmer5020707  | AATCATAGCTACTGCAAAGAAAGTCGCACTG   | 49  | 52 | 877064  | 877034  | emrB | 3.98216E-36 | 7.80206E-07 |
| rs34 | kmer28552159 | GCGAAATCATAGCTACTGCAAAGAAAGTCGC   | 49  | 52 | 877068  | 877038  | emrB | 3.98216E-36 | 7.80206E-07 |
| rs34 | kmer27376253 | GAAATCATAGCTACTGCAAAGAAAGTCGCAC   | 49  | 52 | 877066  | 877036  | emrB | 3.98216E-36 | 7.80206E-07 |
| rs34 | kmer19567092 | CATAGCTACTGCAAAGAAAGTCGCACTGACC   | 49  | 52 | 877061  | 877031  | emrB | 3.98216E-36 | 7.80206E-07 |
| rs34 | kmer7302678  | ACCAGTTCAATCACAGCGAAATCATAGCTAC   | 49  | 52 | 877083  | 877053  | emrB | 3.98216E-36 | 7.80206E-07 |
| rs34 | kmer10733568 | AGCGAAATCATAGCTACTGCAAAGAAAGTCG   | 49  | 52 | 877069  | 877039  | emrB | 3.98216E-36 | 7.80206E-07 |
| rs34 | kmer10956116 | AGCTACTGCAAAGAAAGTCGCACTGACCCCA   | 49  | 52 | 877057  | 877028  | emrB | 3.98216E-36 | 7.80206E-07 |
| rs34 | kmer30065015 | TACCAGTTCAATCACAGCGAAATCATAGCTA   | 49  | 52 | 877084  | 877054  | emrB | 3.98216E-36 | 7.80206E-07 |
| rs34 | kmer22774386 | CGAAATCATAGCTACTGCAAAGAAAGTCGCA   | 49  | 52 | 877067  | 877037  | emrB | 3.98216E-36 | 7.80206E-07 |
| rs34 | kmer18417903 | CACCTACCAGTTCAATCACAGCGAAATCATATA | 49  | 52 | 877088  | 877059  | emrB | 3.98216E-36 | 7.80206E-07 |
| rs34 | kmer31667133 | TCATAGCTACTGCAAAGAAAGTCGCACTGAC   | 49  | 52 | 877062  | 877032  | emrB | 3.98216E-36 | 7.80206E-07 |
| rs34 | kmer22252405 | CCTACCAGTTCAATCACAGCGAAATCATAGC   | 49  | 52 | 877086  | 877056  | emrB | 3.98216E-36 | 7.80206E-07 |
| rs34 | kmer6741385  | ACAGCGAAATCATAGCTACTGCAAAGAAAGT   | 49  | 52 | 877071  | 877041  | emrB | 3.98216E-36 | 7.80206E-07 |
| rs34 | kmer7762141  | ACCTACCAGTTCAATCACAGCGAAATCATAG   | 49  | 52 | 877087  | 877059  | emrB | 3.98216E-36 | 7.80206E-07 |
| rs34 | kmer18192168 | CACAGCGAAATCATAGCTACTGCAAAGAAAG   | 49  | 52 | 877072  | 877042  | emrB | 3.98216E-36 | 7.80206E-07 |
| rs34 | kmer12213221 | AGTTCAATCACAGCGAAATCATAGCTACTGC   | 49  | 52 | 877080  | 877050  | emrB | 3.98216E-36 | 7.80206E-07 |
| rs34 | kmer13066302 | ATAGCTACTGCAAAGAAAGTCGCACTGACCC   | 49  | 52 | 877057  | 877030  | emrB | 3.98216E-36 | 7.80206E-07 |
| rs34 | kmer31460189 | TCACAGCGAAATCATAGCTACTGCAAAGAAA   | 49  | 52 | 877073  | 877043  | emrB | 3.98216E-36 | 7.80206E-07 |
| rs34 | kmer13641656 | ATCACAGCGAAATCATAGCTACTGCAAAGAA   | 49  | 52 | 877074  | 877044  | emrB | 3.98216E-36 | 7.80206E-07 |
| rs34 | kmer4981719  | AATCACAGCGAAATCATAGCTACTGCAAAGA   | 49  | 52 | 877075  | 877045  | emrB | 3.98216E-36 | 7.80206E-07 |
| rs34 | kmer17908725 | CAATCACAGCGAAATCATAGCTACTGCAAAG   | 49  | 52 | 877076  | 877046  | emrB | 3.98216E-36 | 7.80206E-07 |
| rs34 | kmer30504543 | TAGCTACTGCAAAGAAAGTCGCACTGACCCC   | 49  | 52 | 877057  | 877029  | emrB | 3.98216E-36 | 7.80206E-07 |
| rs34 | kmer1722216  | AAATCATAGCTACTGCAAAGAAAGTCGCACT   | 49  | 52 | 877065  | 877035  | emrB | 3.98216E-36 | 7.80206E-07 |
| rs34 | kmer13767395 | ATCATAGCTACTGCAAAGAAAGTCGCACTGA   | 49  | 52 | 877063  | 877033  | emrB | 3.98216E-36 | 7.80206E-07 |
| rs34 | kmer10969668 | AGCTATGATTCGCTGTGATTGAACTGGTAG    | 49  | 52 | 877055  | 877085  | emrB | 3.98216E-36 | 7.80206E-07 |

SuppTableS1\_kmer

|       |              |                                  |     |    |         |         |                |             |             |
|-------|--------------|----------------------------------|-----|----|---------|---------|----------------|-------------|-------------|
| rs438 | kmer32458938 | TCGGACCTCGTCGAGCACTCACCGGTGAACC  | 230 | 7  | 1789541 | 1789511 | <i>Rv1588c</i> | 4.1013E-08  | 2.453E-06   |
| rs438 | kmer25743678 | CTCGGACCTCGTCGAGCACTCACCGGTGAAC  | 230 | 7  | 1789542 | 1789512 | <i>Rv1588c</i> | 4.1013E-08  | 2.453E-06   |
| rs438 | kmer24009119 | CGGACCTCGTCGAGCACTCACCGGTGAACCG  | 230 | 7  | 1789540 | 1789510 | <i>Rv1588c</i> | 4.1013E-08  | 2.453E-06   |
| rs439 | kmer32788855 | TCTCGGACCTCGTCGAGCACTCACCGGTGAAC | 230 | 7  | 1789543 | 1789513 | <i>Rv1588c</i> | 4.02368E-08 | 2.52941E-06 |
| rs732 | kmer22390942 | CCTCGTCGAGCACTCACCGGTGAACCGCTAG  | 224 | 7  | 1789536 | 1789506 | <i>Rv1588c</i> | 2.32481E-07 | 3.28469E-06 |
| rs732 | kmer28662338 | GCGGTTACCGGTGAGTGTCTCGACGAGGTCC  | 224 | 7  | 1789509 | 1789539 | <i>Rv1588c</i> | 2.32481E-07 | 3.28469E-06 |
| rs732 | kmer29076944 | GTCGAGCACTCACCGGTGAACCGCTAGCCCC  | 224 | 7  | 1789532 | 1789502 | <i>Rv1588c</i> | 2.32481E-07 | 3.28469E-06 |
| rs732 | kmer25784527 | CTCGTCGAGCACTCACCGGTGAACCGCTAGC  | 224 | 7  | 1789535 | 1789505 | <i>Rv1588c</i> | 2.32481E-07 | 3.28469E-06 |
| rs732 | kmer10892125 | AGCGGTTACCGGTGAGTGTCTCGACGAGGTCC | 224 | 7  | 1789508 | 1789538 | <i>Rv1588c</i> | 2.32481E-07 | 3.28469E-06 |
| rs732 | kmer24692987 | CGTCGAGCACTCACCGGTGAACCGCTAGCCC  | 224 | 7  | 1789533 | 1789503 | <i>Rv1588c</i> | 2.32481E-07 | 3.28469E-06 |
| rs732 | kmer7810546  | ACCTCGTCGAGCACTCACCGGTGAACCGCTA  | 224 | 7  | 1789537 | 1789507 | <i>Rv1588c</i> | 2.32481E-07 | 3.28469E-06 |
| rs732 | kmer32585325 | TCGTCGAGCACTCACCGGTGAACCGCTAGCC  | 224 | 7  | 1789534 | 1789504 | <i>Rv1588c</i> | 2.32481E-07 | 3.28469E-06 |
| rs14  | kmer11243466 | AGGACGCGGTACGCAATGGCTTGGCCCACCA  | 23  | 42 | 2288811 | 2288782 | <i>pncA</i>    | 1.71561E-17 | 4.8017E-11  |
| rs14  | kmer18920256 | CAGCACCTGGTGGGCCAAGCCATTGCGTAC   | 23  | 42 | 2288774 | 2288803 | <i>pncA</i>    | 1.71561E-17 | 4.8017E-11  |
| rs14  | kmer7502865  | ACCCTGGTGGGCCAAGCCATTGCGTACCGCG  | 23  | 42 | 2288778 | 2288807 | <i>pncA</i>    | 1.71561E-17 | 4.8017E-11  |
| rs14  | kmer26381741 | CTGGTGGGCCAAGCCATTGCGTACCGCGTCC  | 23  | 42 | 2288781 | 2288810 | <i>pncA</i>    | 1.71561E-17 | 4.8017E-11  |
| rs14  | kmer24397829 | CGGTACGCAATGGCTTGGCCCACCGGGTGC   | 23  | 42 | 2288805 | 2288776 | <i>pncA</i>    | 1.71561E-17 | 4.8017E-11  |
| rs14  | kmer21628315 | CCGAGGACGCGGTACGCAATGGCTTGGCCCA  | 23  | 42 | 2288814 | 2288786 | <i>pncA</i>    | 1.71561E-17 | 4.8017E-11  |
| rs14  | kmer7261938  | ACCAGCACCTGGTGGGCCAAGCCATTGCGT   | 23  | 42 | 2288772 | 2288801 | <i>pncA</i>    | 1.71561E-17 | 4.8017E-11  |
| rs14  | kmer28794885 | GCTGTCAGGTCCACCAGCACCTGGTGGGGCC  | 23  | 42 | 2288760 | 2288787 | <i>pncA</i>    | 1.71561E-17 | 4.8017E-11  |
| rs14  | kmer5547802  | AATGGCTTGGCCCACCAGGGTCTGGTGGAC   | 23  | 42 | 2288797 | 2288768 | <i>pncA</i>    | 1.71561E-17 | 4.8017E-11  |
| rs14  | kmer18283116 | CACCAGCACCTGGTGGGCCAAGCCATTGCG   | 23  | 42 | 2288771 | 2288800 | <i>pncA</i>    | 1.71561E-17 | 4.8017E-11  |
| rs14  | kmer20729304 | CCAGCACCTGGTGGGCCAAGCCATTGCGTA   | 23  | 42 | 2288773 | 2288802 | <i>pncA</i>    | 1.71561E-17 | 4.8017E-11  |
| rs14  | kmer31624178 | TCAGGTCCACCAGCACCTGGTGGGCCAAGC   | 23  | 42 | 2288764 | 2288793 | <i>pncA</i>    | 1.71561E-17 | 4.8017E-11  |
| rs14  | kmer22533066 | CCTGGTGGGCCAAGCCATTGCGTACCGCGTC  | 23  | 42 | 2288780 | 2288809 | <i>pncA</i>    | 1.71561E-17 | 4.8017E-11  |
| rs14  | kmer20580821 | CCACCAGCACCTGGTGGGCCAAGCCATTGCG  | 23  | 42 | 2288770 | 2288799 | <i>pncA</i>    | 1.71561E-17 | 4.8017E-11  |
| rs14  | kmer28468077 | GCCGAGGACGCGGTACGCAATGGCTTGGCCC  | 23  | 42 | 2288815 | 2288786 | <i>pncA</i>    | 1.71561E-17 | 4.8017E-11  |
| rs14  | kmer10386069 | AGCACCTGGTGGGCCAAGCCATTGCGTACC   | 23  | 42 | 2288775 | 2288804 | <i>pncA</i>    | 1.71561E-17 | 4.8017E-11  |
| rs14  | kmer11643861 | AGGTCCACCAGCACCTGGTGGGCCAAGCCA   | 23  | 42 | 2288766 | 2288795 | <i>pncA</i>    | 1.71561E-17 | 4.8017E-11  |
| rs14  | kmer23116976 | CGAGGACGCGGTACGCAATGGCTTGGCCCAC  | 23  | 42 | 2288813 | 2288786 | <i>pncA</i>    | 1.71561E-17 | 4.8017E-11  |
| rs14  | kmer18344426 | CACCCTGGTGGGCCAAGCCATTGCGTACCGC  | 23  | 42 | 2288777 | 2288806 | <i>pncA</i>    | 1.71561E-17 | 4.8017E-11  |
| rs14  | kmer15327157 | ATGGCTTGGCCCACCAGGGTGTGGTGGAC    | 23  | 42 | 2288796 | 2288767 | <i>pncA</i>    | 1.71561E-17 | 4.8017E-11  |
| rs14  | kmer26993962 | CTTGGCCCACCAGGGTGTGGTGGACCTGAC   | 23  | 42 | 2288792 | 2288763 | <i>pncA</i>    | 1.71561E-17 | 4.8017E-11  |
| rs14  | kmer27882417 | GAGGACGCGGTACGCAATGGCTTGGCCCACC  | 23  | 42 | 2288812 | 2288783 | <i>pncA</i>    | 1.71561E-17 | 4.8017E-11  |
| rs14  | kmer23909802 | CGCTGTCAGGTCCACCAGCACCTGGTGGGC   | 23  | 42 | 2288759 | 2288787 | <i>pncA</i>    | 1.71561E-17 | 4.8017E-11  |
| rs14  | kmer35461126 | TTGGCCCACCAGGGTGTGGTGGACCTGACA   | 23  | 42 | 2288791 | 2288762 | <i>pncA</i>    | 1.71561E-17 | 4.8017E-11  |
| rs14  | kmer26433640 | CTGTCAGGTCCACCAGCACCTGGTGGGCCA   | 23  | 42 | 2288761 | 2288790 | <i>pncA</i>    | 1.71561E-17 | 4.8017E-11  |
| rs14  | kmer8304203  | ACGCGGTACGCAATGGCTTGGCCCACAGGG   | 23  | 42 | 2288808 | 2288779 | <i>pncA</i>    | 1.71561E-17 | 4.8017E-11  |
| rs14  | kmer19291803 | CAGGTCCACCAGCACCTGGTGGGCCAAGCC   | 23  | 42 | 2288765 | 2288794 | <i>pncA</i>    | 1.71561E-17 | 4.8017E-11  |
| rs14  | kmer18004892 | CAATGGCTTGGCCCACCAGGGTGTGGTGGGA  | 23  | 42 | 2288798 | 2288769 | <i>pncA</i>    | 1.71561E-17 | 4.8017E-11  |
| rs14  | kmer21096931 | CCCACCAGGGTGTGGTGGACCTGACAGCGG   | 23  | 42 | 2288787 | 2288758 | <i>pncA</i>    | 1.71561E-17 | 4.8017E-11  |

\**PPE60* k-mers shown here were not distinguished from *PPE18/19* by conventional mapping

Supplementary Table S2: Five common genes (*PPE18/19*, *gid*, *emrB*, *pncA*, and *Rv1588c*) with their unitigs obtained by DBGWAS and their significant associations with the clustered strains carrying the *katG*-S315T mutation (cluster[+]/S315T[+] = phenotype[+]).

| Gene                            | Component ID | Node ID | Allele frequency | Proportion [No (%) of unitigs among phenotype (-)] | Proportion [No (%) of unitigs among phenotype (+)] | Stistical significance | q value     | Est Effect | Wald Statistics | Unitig sequence                         | Sequence Length | Original annotation                                                                                                                                                                                                                                                                                                                                                                                                                                                                                                                                               |
|---------------------------------|--------------|---------|------------------|----------------------------------------------------|----------------------------------------------------|------------------------|-------------|------------|-----------------|-----------------------------------------|-----------------|-------------------------------------------------------------------------------------------------------------------------------------------------------------------------------------------------------------------------------------------------------------------------------------------------------------------------------------------------------------------------------------------------------------------------------------------------------------------------------------------------------------------------------------------------------------------|
| <b>Hanoi sample set</b>         |              |         |                  |                                                    |                                                    |                        |             |            |                 |                                         |                 |                                                                                                                                                                                                                                                                                                                                                                                                                                                                                                                                                                   |
| <i>PPE18</i>                    | 233          | n197193 | 14               | 8/317 (2.5)                                        | 6/15 (40.0)                                        | Yes                    | 5.56188E-07 | 0.400269   | 7.631371082     | TCACCGGCGGGGGCACCGTCAGCCCATACGTCG 66    |                 |                                                                                                                                                                                                                                                                                                                                                                                                                                                                                                                                                                   |
| <i>gid</i>                      | 104          | n150579 | 321              | 310/317 (97.8)                                     | 11/15 (73.3)                                       | Yes                    | 0.000740263 | -0.3441218 | 4.752993948     | TCGCGTAGGCCCGCCGACGAACCCGGACCTGGG 60    |                 | (AGly)GIDB---[uniprot]_Ribosomal_RNA_small_subunit_methyltransferase_G---[uniprot]_Nitrogenase_iron-molybdenum_cofactor_biosynthesis_protein_NifN                                                                                                                                                                                                                                                                                                                                                                                                                 |
| <i>gid</i>                      | 104          | n248374 | 11               | 7/317 (2.2)                                        | 4/15 (26.7)                                        | Yes                    | 0.000740263 | 0.3441218  | 4.752993948     | AAAGGCGAGCGGGCTCAGCAGAAAGTACGGTAG 61    |                 | (AGly)GIDB---[uniprot]_Ribosomal_RNA_small_subunit_methyltransferase_G---[uniprot]_Nitrogenase_iron-molybdenum_cofactor_biosynthesis_protein_NifN                                                                                                                                                                                                                                                                                                                                                                                                                 |
| <i>gid</i>                      | 104          | n252315 | 312              | 303/317 (95.6)                                     | 9/15 (60.0)                                        | Yes                    | 3.67586E-05 | -0.2848966 | 5.608958218     | CACCGGCGTGTGATGATCGCATCGGGCG 31         |                 | (AGly)GIDB---[uniprot]_Ribosomal_RNA_small_subunit_methyltransferase_G                                                                                                                                                                                                                                                                                                                                                                                                                                                                                            |
| <i>emrB</i>                     | 202          | n200809 | 16               | 10/317 (3.2)                                       | 6/15 (40.0)                                        | Yes                    | 1.70427E-05 | 0.3465184  | 6.949792671     | ATGACCTTTCGACGCGCTACGCGGTGGTATCCGT 61   |                 | [uniprot]_Multidrug_resistance_protein_B_homolog                                                                                                                                                                                                                                                                                                                                                                                                                                                                                                                  |
| <i>emrB</i>                     | 202          | n248807 | 316              | 307/317 (96.8)                                     | 9/15 (60.0)                                        | Yes                    | 1.70427E-05 | -0.3465184 | 6.949792671     | GATAGCGACCGCGCTAGTGGTCTCGAC 61          |                 | [uniprot]_Multidrug_resistance_protein_B_homolog---[uniprot]_Histidine-tRNA_ligase                                                                                                                                                                                                                                                                                                                                                                                                                                                                                |
| <i>Rv1588c</i>                  | 44           | n174787 | 316              | 307/317 (96.8)                                     | 9/15 (60.0)                                        | Yes                    | 1.70427E-05 | -0.3465184 | 6.949792671     | GTCCGAGACCACTAGCGCGGTCCGTCATCACGAATA 61 |                 | [uniprot]_Uncharacterized_protein_Rv3466---[uniprot]_Uncharacterized_protein_MT3572---[uniprot]_Uncharacterized_d_protein_Mb1614c---[uniprot]_Uncharacterized_protein_MT1623---[uniprot]_Uncharacterized_protein_Rv1588c---[uniprot]_Putative_uncharacterized_protein_Rv0095c                                                                                                                                                                                                                                                                                     |
| <i>Rv1588c</i>                  | 44           | n187933 | 313              | 304/317 (95.9)                                     | 9/15 (60.0)                                        | Yes                    | 0.000474085 | -0.2830388 | 6.006374372     | CCACCGGTAGCGGTGCCAAAGGTTCAT 37          |                 | GGAA                                                                                                                                                                                                                                                                                                                                                                                                                                                                                                                                                              |
| <i>Rv1588c</i>                  | 44           | n187933 | 313              | 304/317 (95.9)                                     | 9/15 (60.0)                                        | Yes                    | 0.000474085 | -0.2830388 | 6.006374372     | TGACCACCCCGGAACGGCTCGCGTCTCTGGAAC 34    |                 | G                                                                                                                                                                                                                                                                                                                                                                                                                                                                                                                                                                 |
| <b>KwaZulu-Natal sample set</b> |              |         |                  |                                                    |                                                    |                        |             |            |                 |                                         |                 |                                                                                                                                                                                                                                                                                                                                                                                                                                                                                                                                                                   |
| <i>PPE18</i>                    | 46           | n235433 | 99               | 47/281 (16.7)                                      | 52/56 (92.9)                                       | Yes                    | 4.8561E-10  | 0.5084456  | 14.54529434     | CCAGCTGGCTGCCAGCGAGCTCATCGCCCGGA 37     |                 |                                                                                                                                                                                                                                                                                                                                                                                                                                                                                                                                                                   |
| <i>gid</i>                      | 136          | n689117 | 236              | 232/281 (82.6)                                     | 4/56 (7.1)                                         | Yes                    | 7.94256E-09 | -0.4931431 | 12.03585938     | CCCC 35                                 |                 | (AGly)GIDB---[uniprot]_Ribosomal_RNA_small_subunit_methyltransferase_G                                                                                                                                                                                                                                                                                                                                                                                                                                                                                            |
| <i>gid</i>                      | 136          | n664457 | 99               | 47/281 (16.7)                                      | 52/56 (92.9)                                       | Yes                    | 4.8561E-10  | 0.5084456  | 14.54529434     | ATCTCTCGAAGAACTCGGTGCGGCGCAGTACG 51     |                 | (AGly)GIDB---[uniprot]_Ribosomal_RNA_small_subunit_methyltransferase_G---[uniprot]_ATP-dependent_zinc_metalloprotease_FtsH                                                                                                                                                                                                                                                                                                                                                                                                                                        |
| <i>gid</i>                      | 136          | n361723 | 235              | 231/281 (82.2)                                     | 4/56 (7.1)                                         | Yes                    | 3.0005E-08  | -0.4857804 | 11.73377507     | GTAGATGCCGGTCCCAATA 41                  |                 | (AGly)GIDB---[uniprot]_Ribosomal_RNA_small_subunit_methyltransferase_G---[uniprot]_Ribosomal_RNA_small_subunit_methyltransferase_G_1---[uniprot]_Ribosomal_RNA_small_subunit_methyltransferase_G_2                                                                                                                                                                                                                                                                                                                                                                |
| <i>gid</i>                      | 136          | n190849 | 236              | 232/281 (82.6)                                     | 4/56 (7.1)                                         | Yes                    | 7.94256E-09 | -0.4931431 | 12.03585938     | ATCCACG 68                              |                 | (AGly)GIDB---[uniprot]_Ribosomal_RNA_small_subunit_methyltransferase_G---[uniprot]_Ribosomal_protein_L11_methyltransferase---[uniprot]_UvrABC_system_protein_A---[uniprot]_Dihydroorotase---[uniprot]_tRNAI(Val)_(adenine(37)-N6)-methyltransferase---[uniprot]_Protein-L-isoaspartate_O-methyltransferase---[uniprot]_Uncharacterized_protein_Mb1438c---[uniprot]_Uncharacterized_protein_Rv1403c---[uniprot]_Uncharacterized_protein_MT1447---[uniprot]_N-acetyl-gamma-glutamyl-phosphate_reductase---[uniprot]_Ribosomal_RNA_large_subunit_methyltransferase_E |
| <i>gid</i>                      | 136          | n358132 | 236              | 232/281 (82.6)                                     | 4/56 (7.1)                                         | Yes                    | 7.94256E-09 | -0.4931431 | 12.03585938     | TATGGGACCGGCATCTACTGAACTGCGCCGTGAT 55   |                 | (AGly)GIDB---[uniprot]_Ribosomal_RNA_small_subunit_methyltransferase_G                                                                                                                                                                                                                                                                                                                                                                                                                                                                                            |
| <i>gid</i>                      | 136          | n407225 | 235              | 231/281 (82.2)                                     | 4/56 (7.1)                                         | Yes                    | 3.0005E-08  | -0.4857804 | 11.73377507     | CGGTGAGCTCCTCGAACGCGG 31                |                 | (AGly)GIDB                                                                                                                                                                                                                                                                                                                                                                                                                                                                                                                                                        |
| <i>gid</i>                      | 136          | n438722 | 233              | 229/281 (81.5)                                     | 4/56 (7.1)                                         | Yes                    | 4.13436E-07 | -0.469309  | 10.79347418     | TCTAGGAGAACTACCTGGAGGTCCGGCCGCGCTA 39   |                 | (AGly)GIDB---[uniprot]_Ribosomal_RNA_small_subunit_methyltransferase_G                                                                                                                                                                                                                                                                                                                                                                                                                                                                                            |
| <i>emrB</i>                     | 102          | n446406 | 101              | 49/281 (17.4)                                      | 52/56 (92.9)                                       | Yes                    | 7.94256E-09 | 0.4979022  | 14.19291042     | TCGCC 61                                |                 | [uniprot]_Multidrug_resistance_protein_B_homolog---[uniprot]_Biotin_sulfoxide_reductase                                                                                                                                                                                                                                                                                                                                                                                                                                                                           |
| <i>emrB</i>                     | 102          | n446407 | 234              | 230/281 (81.9)                                     | 4/56 (7.1)                                         | Yes                    | 1.14492E-07 | -0.4841166 | 12.58056117     | CACCTACCAGTTCAATCACAGGAAATCATCGCT 58    |                 | [uniprot]_Multidrug_resistance_protein_B_homolog                                                                                                                                                                                                                                                                                                                                                                                                                                                                                                                  |
| <i>pncA</i>                     | 137          | n121112 | 65               | 23/281 (8.2)                                       | 42/56 (75.0)                                       | Yes                    | 7.63904E-12 | 0.4928669  | 9.852821467     | ACTGCAAAGAAAGTCGCACTGACC 59             |                 | (MTB)PNCa---[uniprot]_5'-nucleotidase_SurE                                                                                                                                                                                                                                                                                                                                                                                                                                                                                                                        |
|                                 |              |         |                  |                                                    |                                                    |                        |             |            |                 | CAGGGTGTGGTGGACCTGACAGCGG               |                 |                                                                                                                                                                                                                                                                                                                                                                                                                                                                                                                                                                   |

Supplementary Table S3: Single nucleotide variants and small indels that were significantly associated with different phenotypes in Hanoi's and KwaZulu-Natal's study population

| Phenotypes          |                   |                                  |                                 |                               |                                              | Positions with SNVs*                                                                                                                                                                                                                                                                                                                                                                                                                                                                                                                                                                                                                                                                                                                                                                                                                                                                                                                                                                                                                                                                                                                                                                                                                                                                                                                                                                                                                                                                                                                                                                                                                                                                                                                                                                                                                                                                                                                                                                                                                                                                                                                                                                                                                                                                                                                                                                                                                                                                                                                                                                                                                                                                                                                                                                                                                                                                                                                                                                                                     | No of SNVs |
|---------------------|-------------------|----------------------------------|---------------------------------|-------------------------------|----------------------------------------------|--------------------------------------------------------------------------------------------------------------------------------------------------------------------------------------------------------------------------------------------------------------------------------------------------------------------------------------------------------------------------------------------------------------------------------------------------------------------------------------------------------------------------------------------------------------------------------------------------------------------------------------------------------------------------------------------------------------------------------------------------------------------------------------------------------------------------------------------------------------------------------------------------------------------------------------------------------------------------------------------------------------------------------------------------------------------------------------------------------------------------------------------------------------------------------------------------------------------------------------------------------------------------------------------------------------------------------------------------------------------------------------------------------------------------------------------------------------------------------------------------------------------------------------------------------------------------------------------------------------------------------------------------------------------------------------------------------------------------------------------------------------------------------------------------------------------------------------------------------------------------------------------------------------------------------------------------------------------------------------------------------------------------------------------------------------------------------------------------------------------------------------------------------------------------------------------------------------------------------------------------------------------------------------------------------------------------------------------------------------------------------------------------------------------------------------------------------------------------------------------------------------------------------------------------------------------------------------------------------------------------------------------------------------------------------------------------------------------------------------------------------------------------------------------------------------------------------------------------------------------------------------------------------------------------------------------------------------------------------------------------------------------------|------------|
| cluster[+]<br>Hanoi | S315T[+]<br>Hanoi | cluster[+]/<br>S315T[+]<br>Hanoi | cluster[+]<br>KwaZulu-<br>Natal | S315T[+]<br>KwaZulu-<br>Natal | cluster[+]/<br>S315T[+]<br>KwaZulu-<br>Natal |                                                                                                                                                                                                                                                                                                                                                                                                                                                                                                                                                                                                                                                                                                                                                                                                                                                                                                                                                                                                                                                                                                                                                                                                                                                                                                                                                                                                                                                                                                                                                                                                                                                                                                                                                                                                                                                                                                                                                                                                                                                                                                                                                                                                                                                                                                                                                                                                                                                                                                                                                                                                                                                                                                                                                                                                                                                                                                                                                                                                                          |            |
| No                  | No                | Yes                              | No                              | No                            | No                                           | 897358, 2562288, 786311, 2056866, 3160421, 3778338, 567208, 2191082, 783342, 3640321, 2876955, 1027239, 3710380, 1954655, 2403177, 179091, 2129998, 2423422, 3594831, 3046181, 1740691, 2701529, 1598423, 526058, 2766789, 1437948, 542074, 1908105, 3782763, 1619591, 2438670, 3177276, 219804, 2775156, 499816, 3099391, 4204224, 1436403, 1600063, 3784399, 4277325, 2449325, 1419193, 2774856, 211664, 2056902, 1574837, 1735805, 3001584, 1934875, 1340667, 3944342, 1091590, 3944340, 2803670, 1339649, 631318, 3607420, 1339644, 3859614, 1893183, 1068960, 4018615, 4258229, 3368380, 3583543, 3734943, 2720993, 226522, 2876938, 3257937, 3963393, 2595142, 3794515, 1789735, 2586925, 4117974, 861878, 480468, 3405338, 3872538, 3057998, 2502324, 2757836, 2984903, 192182, 2441637, 1659662, 3142701, 3298532, 848436, 3766200, 2142602, 767570, 2032791, 218465, 343185, 1677986, 275657, 2867088, 1167975, 2947988, 3304104, 1630688, 3197045, 2211210, 1731055, 60414, 1171094, 2859133, 1846481, 2964867, 479505, 3443266, 1497267, 64495, 3538141, 1690715, 2326293, 4015697, 1355645, 4338537, 1545881, 2344942, 842266, 2208493, 876918, 4382055, 1290838, 1394032, 1942636, 4143453, 3989051, 3451440, 94961, 2212028, 1966742, 544146, 61846, 1641019, 581848, 795920, 1166498, 3089878, 2318825, 1099142, 4067394, 2226037, 1341344, 3575931, 3430006, 209259, 3042024, 2842880, 1846335, 1112922, 2453147, 4130795, 1145941, 1304703, 4314255, 975932, 4161437, 1309585, 3725794, 1340688, 1099769, 3949345, 2288820, 1216545, 83778, 3604064, 767395, 845386, 3941595, 3893944, 3746219, 777664, 3941605, 1411346, 3941604, 2081011, 927496, 2628895, 1987546, 1385214, 626195, 1423583, 1233342, 2840109, 2193886, 2605885, 2888827, 194787, 3451186, 3213678, 3866167, 346506, 2408079, 4407686, 1973987, 3545427, 4117356, 4228988, 1275379, 1358237, 2733749, 350702, 2044116, 3914154, 4369452, 3819448, 2677876, 14270, 3936503, 3007119, 4343176, 4381079, 433627, 3141737, 2044884, 2662802, 2284326, 1405701, 3818638, 952487, 192492, 1753350, 1690284, 1358515, 179874, 2614232, 548497, 3365184, 2980684, 4285042, 4024520, 508326, 430177, 2078585, 3437020, 2383160, 684355, 257071, 3079112, 840205, 840206, 840207, 2427457, 1086711, 2263631, 161416, 2628893, 3736108, 1800902, 3844733, 3218997, 782148, 3000401, 2318206, 312686, 1760688, 549777, 2500964, 1160131, 1194351, 3068497, 782634, 450525, 3899672, 2835894, 215049, 132596, 224057, 2251313, 489741, 3721174, 2714526, 217459, 1164619, 993352, 2255482, 3770743, 4058762, 2043141, 2220482, 1675193, 150496, 1202643, 845697, 3287430, 3736828, 334160, 348095, 2138730, 725365, 256818, 2358525, 141457, 308520, 1886155, 3540882, 3684649, 292679, 550103, 3300005, 513789, 335663, 4076016, 449633, 1554418, 3462822, 3570896, 845990, 2284652, 1241386, 1232778, 2610381, 2739546, 1651706, 1397606, 3724042, 655559, 774065, 3193202, 2093991, 826717, 396771, 1341152, 1843620, 115267, 3413574, 1341148 | 334        |
| No                  | No                | No                               | Yes                             | No                            | Yes                                          | 763123, 2246032, 664929, 4056430, 4269271, 761110, 756757, 1272321, 2288785, 2300669, 2300674, 2300676, 2300678, 2300680, 2300690, 2300699, 3889150, 7570, 2300666, 1673432, 761161, 1473246, 762889                                                                                                                                                                                                                                                                                                                                                                                                                                                                                                                                                                                                                                                                                                                                                                                                                                                                                                                                                                                                                                                                                                                                                                                                                                                                                                                                                                                                                                                                                                                                                                                                                                                                                                                                                                                                                                                                                                                                                                                                                                                                                                                                                                                                                                                                                                                                                                                                                                                                                                                                                                                                                                                                                                                                                                                                                     | 23         |
| No                  | No                | No                               | No                              | No                            | Yes                                          | 4354671, 2601713, 2608956, 3633957, 302691, 537387, 881918, 1370737, 2665148, 3533193, 3296639, 3856224, 4011950, 1967844, 1264381, 877058, 147946, 572468, 1197700, 2486496                                                                                                                                                                                                                                                                                                                                                                                                                                                                                                                                                                                                                                                                                                                                                                                                                                                                                                                                                                                                                                                                                                                                                                                                                                                                                                                                                                                                                                                                                                                                                                                                                                                                                                                                                                                                                                                                                                                                                                                                                                                                                                                                                                                                                                                                                                                                                                                                                                                                                                                                                                                                                                                                                                                                                                                                                                             | 20         |
| No                  | No                | No                               | Yes                             | Yes                           | Yes                                          | 24125, 122107, 2401402, 3272997, 4327484, 4409995                                                                                                                                                                                                                                                                                                                                                                                                                                                                                                                                                                                                                                                                                                                                                                                                                                                                                                                                                                                                                                                                                                                                                                                                                                                                                                                                                                                                                                                                                                                                                                                                                                                                                                                                                                                                                                                                                                                                                                                                                                                                                                                                                                                                                                                                                                                                                                                                                                                                                                                                                                                                                                                                                                                                                                                                                                                                                                                                                                        | 6          |
| No                  | No                | No                               | Yes                             | No                            | No                                           | 2195976, 2535716, 849742                                                                                                                                                                                                                                                                                                                                                                                                                                                                                                                                                                                                                                                                                                                                                                                                                                                                                                                                                                                                                                                                                                                                                                                                                                                                                                                                                                                                                                                                                                                                                                                                                                                                                                                                                                                                                                                                                                                                                                                                                                                                                                                                                                                                                                                                                                                                                                                                                                                                                                                                                                                                                                                                                                                                                                                                                                                                                                                                                                                                 | 3          |
| No                  | Yes               | No                               | No                              | No                            | No                                           | 4374724, 4063178                                                                                                                                                                                                                                                                                                                                                                                                                                                                                                                                                                                                                                                                                                                                                                                                                                                                                                                                                                                                                                                                                                                                                                                                                                                                                                                                                                                                                                                                                                                                                                                                                                                                                                                                                                                                                                                                                                                                                                                                                                                                                                                                                                                                                                                                                                                                                                                                                                                                                                                                                                                                                                                                                                                                                                                                                                                                                                                                                                                                         | 2          |
| No                  | Yes               | Yes                              | No                              | Yes                           | No                                           | 2155168                                                                                                                                                                                                                                                                                                                                                                                                                                                                                                                                                                                                                                                                                                                                                                                                                                                                                                                                                                                                                                                                                                                                                                                                                                                                                                                                                                                                                                                                                                                                                                                                                                                                                                                                                                                                                                                                                                                                                                                                                                                                                                                                                                                                                                                                                                                                                                                                                                                                                                                                                                                                                                                                                                                                                                                                                                                                                                                                                                                                                  | 1          |
| No                  | No                | No                               | No                              | Yes                           | No                                           | 781822                                                                                                                                                                                                                                                                                                                                                                                                                                                                                                                                                                                                                                                                                                                                                                                                                                                                                                                                                                                                                                                                                                                                                                                                                                                                                                                                                                                                                                                                                                                                                                                                                                                                                                                                                                                                                                                                                                                                                                                                                                                                                                                                                                                                                                                                                                                                                                                                                                                                                                                                                                                                                                                                                                                                                                                                                                                                                                                                                                                                                   | 1          |

cluster[+]: clustered (pairwise SNV difference between the two isolates is no more than five SNVs); S315T[+]: harboring *katG*-S315T mutation; Hanoi: Hanoi's study cohort; KwaZulu-Natal: KwaZulu-Natal's study cohort; SNV: single nucleotide variant

\*3944342: two SNVs were reported at one position.

**Supplementary Table S4: Details of single nucleotide variants and small indels that were significantly associated with strains carrying *katG*-S315T mutation in the Hanoi study population.**

| Position | Gene            | Locus name | Pattern | P value     | Principal component | Variant category        | Impact   | Nucleotide change                               | Amin acid change   | No among phenotype (-) | No among phenotype (+) |
|----------|-----------------|------------|---------|-------------|---------------------|-------------------------|----------|-------------------------------------------------|--------------------|------------------------|------------------------|
| 14270    | <i>Rv0012</i>   | Rv0012     | 1227    | 2.99092E-06 | 10                  | missense_variant        | MODERATE | c.182A>G                                        | p.Asp61Gly         | 7                      | 4                      |
| 60414    | <i>Rv0057</i>   | Rv0057     | 1017    | 1.50744E-08 | 7                   | synonymous_variant      | LOW      | c.519C>T                                        | p.Thr173Thr        | 10                     | 6                      |
| 61846    | <i>dnaB</i>     | Rv0058     | 1017    | 1.50744E-08 | 7                   | missense_variant        | MODERATE | c.1451C>A                                       | p.Ala484Glu        | 10                     | 6                      |
| 64495    | <i>Rv0060</i>   | Rv0060     | 1017    | 1.50744E-08 | 7                   | missense_variant        | MODERATE | c.587A>G                                        | p.His196Arg        | 10                     | 6                      |
| 83778    | <i>Rv0074</i>   | Rv0074     | 67      | 5.28411E-07 | 324                 | missense_variant        | MODERATE | c.1031C>T                                       | p.Thr344Ile        | 0                      | 1                      |
| 94961    | <i>hycQ</i>     | Rv0086     | 1017    | 1.50744E-08 | 7                   | synonymous_variant      | LOW      | c.1011C>T                                       | p.Leu337Leu        | 10                     | 6                      |
| 115267   | <i>nrp</i>      | Rv0101     | 1231    | 1.71959E-05 | 10                  | missense_variant        | MODERATE | c.5267T>C                                       | p.Val1756Ala       | 8                      | 4                      |
|          |                 |            |         |             |                     | conservative_inframe_d  |          |                                                 |                    |                        |                        |
|          |                 |            |         |             |                     | letion                  | MODERATE | c.1231_1239delGCCGGCGGG                         | p.Ala411_Gly413del | 8                      | 4                      |
| 132596   | <i>PE_PGRS1</i> | Rv0109     | 1231    | 1.71959E-05 | 10                  | synonymous_variant      | LOW      | c.258G>C                                        | p.Arg86Arg         | 8                      | 4                      |
| 141457   | <i>oxyS</i>     | Rv0117     | 1231    | 1.71959E-05 | 10                  | missense_variant        | MODERATE | c.964A>G                                        | p.Ile322Val        | 8                      | 4                      |
| 150496   | <i>PE_PGRS2</i> | Rv0124     | 1231    | 1.71959E-05 | 10                  | missense_variant        | MODERATE | c.548A>G                                        | p.Glu183Gly        | 0                      | 1                      |
| 161416   | <i>Rv0133</i>   | Rv0133     | 666     | 0.000009805 | 217                 | missense_variant        | MODERATE | c.219G>T                                        | p.Pro73Pro         | 0                      | 2                      |
| 179091   | <i>PE1</i>      | Rv0151c    | 391     | 7.33622E-13 | 15                  | synonymous_variant      | LOW      | c.1023C>T                                       | p.Gly341Gly        | 14                     | 6                      |
| 179784   | <i>PE2</i>      | Rv0152c    | 1019    | 6.34814E-06 | 7                   | synonymous_variant      | LOW      | c.954A>G                                        | p.Ser318Ser        | 10                     | 6                      |
| 192182   | <i>adhE1</i>    | Rv0162c    | 1017    | 1.50744E-08 | 7                   | synonymous_variant      | LOW      | c.644G>A                                        | p.Gly215Glu        | 14                     | 6                      |
| 192492   | <i>adhE1</i>    | Rv0162c    | 1019    | 6.34814E-06 | 7                   | missense_variant        | MODERATE | c.29G>A                                         | p.Arg10Gln         | 7                      | 4                      |
| 194787   | <i>mce1R</i>    | Rv0165c    | 1227    | 2.99092E-06 | 10                  | missense_variant        | MODERATE | c.322C>T                                        | p.Arg108Cys        | 10                     | 6                      |
| 209259   | <i>Rv0178</i>   | Rv0178     | 1017    | 1.50744E-08 | 7                   | missense_variant        | MODERATE | c.587G>C                                        | p.Ser196Thr        | 0                      | 2                      |
| 211664   | <i>Rv0180c</i>  | Rv0180c    | 617     | 1.59682E-09 | 215                 | missense_variant        | MODERATE | c.81C>T                                         | p.Asp27Asp         | 8                      | 4                      |
| 215049   | <i>Rv0184</i>   | Rv0184     | 1231    | 1.71959E-05 | 10                  | synonymous_variant      | LOW      | c.1191T>C                                       | p.Ser397Ser        | 8                      | 4                      |
| 217459   | <i>bglS</i>     | Rv0186     | 1231    | 1.71959E-05 | 10                  | synonymous_variant      | LOW      | c.87A>G                                         | p.Glu29Glu         | 10                     | 6                      |
| 218465   | <i>mymT</i>     | Rv0186A    | 1017    | 1.50744E-08 | 7                   | synonymous_variant      | LOW      | c.319G>A                                        | p.Gly107Arg        | 0                      | 2                      |
| 219804   | <i>Rv0188</i>   | Rv0188     | 470     | 1.55984E-09 | 216                 | missense_variant        | MODERATE | c.494C>T                                        | p.Ala165Val        | 8                      | 4                      |
| 224057   | <i>Rv0192</i>   | Rv0192     | 1231    | 1.71959E-05 | 10                  | missense_variant        | MODERATE | c.50C>T                                         | p.Thr17Ile         | 10                     | 6                      |
| 226522   | <i>Rv0193c</i>  | Rv0193c    | 1017    | 1.50744E-08 | 7                   | missense_variant        | MODERATE | c.755C>T                                        | p.Ala252Val        | 8                      | 4                      |
| 256818   | <i>fadD4</i>    | Rv0214     | 1231    | 1.71959E-05 | 10                  | missense_variant        | MODERATE | c.1008C>T                                       | p.Tyr336Tyr        | 14                     | 6                      |
| 257071   | <i>fadD4</i>    | Rv0214     | 1019    | 6.34814E-06 | 7                   | synonymous_variant      | LOW      | c.307G>C                                        | p.Val103Leu        | 10                     | 6                      |
| 275657   | <i>php</i>      | Rv0230c    | 1017    | 1.50744E-08 | 7                   | missense_variant        | MODERATE | c.509A>G                                        | p.Glu170Gly        | 8                      | 4                      |
| 292679   | <i>fadA2</i>    | Rv0243     | 1231    | 1.71959E-05 | 10                  | missense_variant        | MODERATE | c.1028C>A                                       | p.Ala343Asp        | 8                      | 4                      |
| 308520   | <i>PPE2</i>     | Rv0256c    | 1231    | 1.71959E-05 | 10                  | missense_variant        | MODERATE | c.-4828G>A                                      |                    | 8                      | 4                      |
| 312686   | <i>cobQ1</i>    | Rv0255c    | 1231    | 1.71959E-05 | 10                  | upstream_gene_variant   | MODIFIER | c.2151G>T                                       | p.Leu717Leu        | 8                      | 4                      |
| 334160   | <i>PE_PGRS3</i> | Rv0278c    | 1231    | 1.71959E-05 | 10                  | synonymous_variant      | LOW      | c.606_647delCGCCGGCGGCGG<br>CCGGCGGCGGCGTAGTAGC |                    |                        |                        |
|          |                 |            |         |             |                     | disruptive_inframe_dele |          |                                                 |                    |                        |                        |
|          |                 |            |         |             |                     | tion                    | MODERATE | CCTCACGGGCGG                                    | p.Ala203_Gly216del | 8                      | 4                      |
| 335663   | <i>PE_PGRS3</i> | Rv0278c    | 1231    | 1.71959E-05 | 10                  | synonymous_variant      | LOW      | c.1056C>T                                       | p.Arg352Arg        | 10                     | 6                      |
| 343185   | <i>eccA3</i>    | Rv0282     | 1017    | 1.50744E-08 | 7                   | missense_variant        | MODERATE | c.872C>T                                        | p.Ala291Val        | 7                      | 4                      |
| 346506   | <i>eccC3</i>    | Rv0284     | 1227    | 2.99092E-06 | 10                  | missense_variant        | MODERATE | c.2461T>C                                       | p.Ser821Pro        | 8                      | 4                      |
| 348095   | <i>eccC3</i>    | Rv0284     | 1231    | 1.71959E-05 | 10                  | missense_variant        | MODERATE | c.768C>T                                        | p.Gly256Gly        | 7                      | 4                      |
| 350702   | <i>PPE4</i>     | Rv0286     | 1227    | 2.99092E-06 | 10                  | synonymous_variant      | LOW      | c.571C>G                                        | p.Pro191Ala        | 8                      | 4                      |
| 396771   | <i>Rv0331</i>   | Rv0331     | 1231    | 1.71959E-05 | 10                  | missense_variant        | MODERATE | c.4502dupA                                      | p.Asn1501fs        | 14                     | 6                      |
| 430177   | <i>PPE8</i>     | Rv0355c    | 1019    | 6.34814E-06 | 7                   | frameshift_variant      | HIGH     | c.1053C>T                                       | p.Ser351Ser        | 14                     | 6                      |
| 433627   | <i>PPE8</i>     | Rv0355c    | 1019    | 6.34814E-06 | 7                   | synonymous_variant      | LOW      | c.2171C>T                                       | p.Thr724Ile        | 8                      | 4                      |
| 449633   | <i>Rv0373c</i>  | Rv0373c    | 1231    | 1.71959E-05 | 10                  | missense_variant        | MODERATE | c.1279A>C                                       | p.Thr427Pro        | 8                      | 4                      |
| 450525   | <i>Rv0373c</i>  | Rv0373c    | 1231    | 1.71959E-05 | 10                  | missense_variant        | MODERATE | c.249G>T                                        | p.Ala83Ala         | 10                     | 6                      |
| 479505   | <i>fadE7</i>    | Rv0400c    | 1017    | 1.50744E-08 | 7                   | synonymous_variant      | LOW      | c.2764G>C                                       | p.Gly922Arg        | 10                     | 6                      |
| 480468   | <i>mmpL1</i>    | Rv0402c    | 1017    | 1.50744E-08 | 7                   | missense_variant        | MODERATE | c.4011G>A                                       | p.Val1337Val       | 8                      | 4                      |
| 489741   | <i>pkS6</i>     | Rv0405     | 1231    | 1.71959E-05 | 10                  | synonymous_variant      | LOW      |                                                 |                    |                        |                        |

|         |                  |         |      |             |     |                               |          |                         |                    |    |   |
|---------|------------------|---------|------|-------------|-----|-------------------------------|----------|-------------------------|--------------------|----|---|
| 499816  | <i>mutT3</i>     | Rv0413  | 470  | 1.55984E-09 | 216 | missense_variant              | MODERATE | c.104C>T                | p.Ala35Val         | 0  | 2 |
| 508326  | <i>thiD</i>      | Rv0422c | 1019 | 6.34814E-06 | 7   | missense_variant              | MODERATE | c.230A>G                | p.Lys77Arg         | 14 | 6 |
| 513789  | <i>ctpH</i>      | Rv0425c | 1231 | 1.71959E-05 | 10  | synonymous_variant            | LOW      | c.1533G>A               | p.Val511Val        | 8  | 4 |
| 526058  | <i>psd</i>       | Rv0437c | 667  | 7.17007E-11 | 217 | missense_variant              | MODERATE | c.25G>C                 | p.Gly9Arg          | 0  | 2 |
| 542074  | <i>Rv0448c</i>   | Rv0448c | 667  | 7.17007E-11 | 217 | upstream_gene_variant         | MODIFIER | c.-4905T>A              |                    | 0  | 2 |
| 544146  | <i>PPE11</i>     | Rv0453  | 1017 | 1.50744E-08 | 7   | missense_variant              | MODERATE | c.973G>A                | p.Val325Ile        | 10 | 6 |
| 548497  | <i>Rv0457c</i>   | Rv0457c | 1019 | 6.34814E-06 | 7   | missense_variant              | MODERATE | c.1111G>A               | p.Ala371Thr        | 14 | 6 |
| 549777  | <i>Rv0458</i>    | Rv0458  | 1231 | 1.71959E-05 | 10  | missense_variant              | MODERATE | c.103C>T                | p.Arg35Cys         | 8  | 4 |
| 550103  | <i>Rv0458</i>    | Rv0458  | 1231 | 1.71959E-05 | 10  | synonymous_variant            | LOW      | c.429C>T                | p.Ile143Ile        | 8  | 4 |
| 567208  | <i>Rv0477</i>    | Rv0477  | 391  | 7.33622E-13 | 15  | missense_variant              | MODERATE | c.433G>A                | p.Glu145Lys        | 0  | 2 |
| 581848  | <i>Rv0492c</i>   | Rv0492c | 1017 | 1.50744E-08 | 7   | missense_variant              | MODERATE | c.1531G>A               | p.Val511Ile        | 10 | 6 |
| 626195  | <i>menA</i>      | Rv0534c | 1227 | 2.99092E-06 | 10  | synonymous_variant            | LOW      | c.246G>A                | p.Arg82Arg         | 7  | 4 |
| 631318  | <i>Rv0538</i>    | Rv0538  | 1016 | 1.94095E-09 | 7   | missense_variant              | MODERATE | c.1279C>A               | p.Pro427Thr        | 9  | 6 |
| 655559  | <i>gpdA1</i>     | Rv0564c | 1231 | 1.71959E-05 | 10  | missense_variant              | MODERATE | c.391C>T                | p.Pro131Ser        | 8  | 4 |
| 684355  | <i>Rv0585c</i>   | Rv0585c | 1231 | 1.71959E-05 | 10  | upstream_gene_variant         | MODIFIER | c.-84delC               |                    | 8  | 4 |
| 725365  | <i>recC</i>      | Rv0631c | 1231 | 1.71959E-05 | 10  | missense_variant              | MODERATE | c.2942T>C               | p.Phe981Ser        | 8  | 4 |
| 767395  | <i>end</i>       | Rv0670  | 67   | 5.28411E-07 | 324 | upstream_gene_variant         | MODIFIER | c.-2397G>A              |                    | 0  | 1 |
| 767570  | <i>end</i>       | Rv0670  | 1017 | 1.50744E-08 | 7   | upstream_gene_variant         | MODIFIER | c.-2222G>A              |                    | 10 | 6 |
| 774065  | <i>Rv0674</i>    | Rv0674  | 1231 | 1.71959E-05 | 10  | start_lost                    | HIGH     | c.2T>C                  | p.Met1?            | 8  | 4 |
| 777664  | <i>mmpL5</i>     | Rv0676c | 631  | 0.00000078  | 281 | missense_variant              | MODERATE | c.817G>A                | p.Ala273Thr        | 0  | 1 |
| 782148  | <i>rpsG</i>      | Rv0683  | 1231 | 1.71959E-05 | 10  | missense_variant              | MODERATE | c.215C>A                | p.Ala72Asp         | 8  | 4 |
| 782634  | <i>fusA1</i>     | Rv0684  | 1231 | 1.71959E-05 | 10  | synonymous_variant            | LOW      | c.150A>G                | p.Ala50Ala         | 8  | 4 |
| 783342  | <i>fusA1</i>     | Rv0684  | 391  | 7.33622E-13 | 15  | synonymous_variant            | LOW      | c.858G>A                | p.Pro286Pro        | 0  | 2 |
| 786311  | <i>Rv0686</i>    | Rv0686  | 381  | 1.75432E-13 | 299 | missense_variant              | MODERATE | c.163C>T                | p.Leu55Phe         | 0  | 2 |
| 795920  | <i>Rv0696</i>    | Rv0696  | 1017 | 1.50744E-08 | 7   | synonymous_variant            | LOW      | c.402A>G                | p.Val134Val        | 10 | 6 |
| 826717  | <i>mapA</i>      | Rv0734  | 1231 | 1.71959E-05 | 10  | synonymous_variant            | LOW      | c.48C>T                 | p.Arg16Arg         | 8  | 4 |
| 840205  | <i>PE_PGRS10</i> | Rv0747  | 123  | 9.38491E-06 | 217 | frameshift_variant            | HIGH     | c.1755_1756insGG        | p.Leu586fs         | 0  | 1 |
| 840206  | <i>PE_PGRS10</i> | Rv0747  | 123  | 9.38491E-06 | 217 | frameshift_variant            | HIGH     | c.1756_1757insG         | p.Leu586fs         | 0  | 1 |
| 840207  | <i>PE_PGRS10</i> | Rv0747  | 123  | 9.38491E-06 | 217 | missense_variant              | MODERATE | c.1757T>G               | p.Leu586Arg        | 0  | 1 |
| 842266  | <i>Rv0750</i>    | Rv0750  | 1017 | 1.50744E-08 | 7   | synonymous_variant            | LOW      | c.234C>T                | p.Ala78Ala         | 10 | 6 |
| 845386  | <i>mmsA</i>      | Rv0753c | 631  | 0.00000078  | 281 | missense_variant              | MODERATE | c.568T>C                | p.Phe190Leu        | 0  | 1 |
| 845697  | <i>mmsA</i>      | Rv0753c | 1231 | 1.71959E-05 | 10  | missense_variant              | MODERATE | c.257A>C                | p.Glu86Ala         | 8  | 4 |
| 845990  | <i>Rv0749A</i>   | Rv0749A | 1231 | 1.71959E-05 | 10  | upstream_gene_variant         | MODIFIER | c.-4122_-4117delAGTATC  |                    | 8  | 4 |
| 848436  | <i>PPE12</i>     | Rv0755c | 1017 | 1.50744E-08 | 7   | synonymous_variant            | LOW      | c.1605T>C               | p.Ser535Ser        | 10 | 6 |
| 861878  | <i>aldA</i>      | Rv0768  | 1017 | 1.50744E-08 | 7   | missense_variant              | MODERATE | c.967G>A                | p.Gly323Ser        | 10 | 6 |
| 876918  | <i>emrB</i>      | Rv0783c | 1017 | 1.50744E-08 | 7   | missense_variant              | MODERATE | c.1523T>C               | p.Phe508Ser        | 10 | 6 |
| 897358  | <i>purL</i>      | Rv0803  | 1017 | 1.50744E-08 | 7   | synonymous_variant            | LOW      | c.1539C>T               | p.Cys513Cys        | 10 | 6 |
| 927496  | <i>PE_PGRS13</i> | Rv0833  | 471  | 0.000001085 | 40  | disruptive_inframe_deletion   | MODERATE | c.2151_2159delCGGCAACGG | p.Gly718_Gly720del | 1  | 2 |
| 952487  | <i>far</i>       | Rv0855  | 1019 | 6.34814E-06 | 7   | missense_variant              | MODERATE | c.856C>T                | p.Arg286Cys        | 14 | 6 |
| 975932  | <i>Rv0876c</i>   | Rv0876c | 1017 | 1.50744E-08 | 7   | synonymous_variant            | LOW      | c.6C>T                  | p.Ala2Ala          | 10 | 6 |
| 993352  | <i>Rv0891c</i>   | Rv0891c | 1231 | 1.71959E-05 | 10  | missense_variant              | MODERATE | c.104C>T                | p.Ala35Val         | 8  | 4 |
| 1027239 | <i>Rv0921</i>    | Rv0921  | 391  | 7.33622E-13 | 15  | missense_variant              | MODERATE | c.136T>G                | p.Ser46Ala         | 0  | 2 |
| 1068960 | <i>purH</i>      | Rv0957  | 1017 | 1.50744E-08 | 7   | synonymous_variant            | LOW      | c.756C>T                | p.His252His        | 10 | 6 |
| 1086711 | <i>accD2</i>     | Rv0974c | 666  | 0.000009805 | 217 | missense_variant              | MODERATE | c.635T>C                | p.Val212Ala        | 0  | 1 |
| 1091590 | <i>PE_PGRS16</i> | Rv0977  | 893  | 1.94095E-09 | 7   | conservative_inframe_deletion | MODERATE | c.1231_1233delGGC       | p.Gly411del        | 9  | 6 |
| 1099142 | <i>pepD</i>      | Rv0983  | 1017 | 1.50744E-08 | 7   | missense_variant              | MODERATE | c.77C>T                 | p.Ser26Leu         | 10 | 6 |
| 1099769 | <i>pepD</i>      | Rv0983  | 1018 | 9.0534E-08  | 7   | missense_variant              | MODERATE | c.704G>A                | p.Ser235Asn        | 11 | 6 |
| 1112922 | <i>Rv0996</i>    | Rv0996  | 1017 | 1.50744E-08 | 7   | disruptive_inframe_deletion   | MODERATE | c.560_565delAATACG      | p.Glu187_Tyr188del | 10 | 6 |

|         |                  |         |      |             |     |                       |          |                   |              |    |    |
|---------|------------------|---------|------|-------------|-----|-----------------------|----------|-------------------|--------------|----|----|
| 1145941 | <i>Rv1024</i>    | Rv1024  | 1017 | 1.50744E-08 | 7   | synonymous_variant    | LOW      | c.84T>C           | p.Gly28Gly   | 10 | 6  |
| 1160131 | <i>Rv1036c</i>   | Rv1036c | 1231 | 1.71959E-05 | 10  | synonymous_variant    | LOW      | c.303G>A          | p.Glu101Glu  | 8  | 4  |
| 1164619 | <i>Rv1041c</i>   | Rv1041c | 1231 | 1.71959E-05 | 10  | missense_variant      | MODERATE | c.817G>A          | p.Val273Ile  | 8  | 4  |
| 1166498 | <i>Rv1043c</i>   | Rv1043c | 1017 | 1.50744E-08 | 7   | frameshift_variant    | HIGH     | c.308delG         | p.Gly103fs   | 10 | 6  |
| 1167975 | <i>Rv1045</i>    | Rv1045  | 1017 | 1.50744E-08 | 7   | synonymous_variant    | LOW      | c.303G>A          | p.Glu101Glu  | 10 | 6  |
| 1171094 | <i>Rv1048c</i>   | Rv1048c | 1017 | 1.50744E-08 | 7   | missense_variant      | MODERATE | c.1060G>A         | p.Ala354Thr  | 10 | 6  |
| 1194351 | <i>echA8</i>     | Rv1070c | 1231 | 1.71959E-05 | 10  | synonymous_variant    | LOW      | c.693T>C          | p.His231His  | 8  | 4  |
| 1202643 | <i>cbs</i>       | Rv1077  | 1231 | 1.71959E-05 | 10  | synonymous_variant    | LOW      | c.927G>T          | p.Ala309Ala  | 8  | 4  |
| 1216545 | <i>PE_PGRS22</i> | Rv1091  | 380  | 0.000000498 | 324 | missense_variant      | MODERATE | c.77C>T           | p.Ala26Val   | 0  | 1  |
| 1232778 | <i>Rv1105</i>    | Rv1105  | 1231 | 1.71959E-05 | 10  | frameshift_variant    | HIGH     | c.470_474delACGAC | p.His157fs   | 8  | 4  |
| 1233342 | <i>Rv1106c</i>   | Rv1106c | 1227 | 2.99092E-06 | 10  | synonymous_variant    | LOW      | c.615C>G          | p.Leu205Leu  | 7  | 4  |
| 1241386 | <i>Rv1116A</i>   | Rv1116A | 1231 | 1.71959E-05 | 10  | missense_variant      | MODERATE | c.5G>A            | p.Gly2Asp    | 8  | 4  |
| 1275379 | <i>Rv1147</i>    | Rv1147  | 1227 | 2.99092E-06 | 10  | synonymous_variant    | LOW      | c.480C>T          | p.Asp160Asp  | 7  | 4  |
| 1290838 | <i>narG</i>      | Rv1161  | 1017 | 1.50744E-08 | 7   | missense_variant      | MODERATE | c.3511C>T         | p.Pro1171Ser | 10 | 6  |
| 1304703 | <i>fbtC</i>      | Rv1173  | 1017 | 1.50744E-08 | 7   | synonymous_variant    | LOW      | c.1773C>T         | p.Ala591Ala  | 10 | 6  |
| 1309585 | <i>Rv1178</i>    | Rv1178  | 1017 | 1.50744E-08 | 7   | synonymous_variant    | LOW      | c.222T>C          | p.Ala74Ala   | 10 | 6  |
| 1339644 | <i>PPE18</i>     | Rv1196  | 1016 | 1.94095E-09 | 7   | missense_variant      | MODERATE | c.296A>C          | p.Glu99Ala   | 9  | 6  |
| 1339649 | <i>PPE18</i>     | Rv1196  | 1016 | 1.94095E-09 | 7   | missense_variant      | MODERATE | c.301G>A          | p.Ala101Thr  | 9  | 6  |
| 1340667 | <i>esxK</i>      | Rv1197  | 1277 | 1.77973E-09 | 7   | synonymous_variant    | LOW      | c.9A>G            | p.Ser3Ser    | 29 | 10 |
| 1340688 | <i>esxK</i>      | Rv1197  | 894  | 8.81145E-08 | 7   | synonymous_variant    | LOW      | c.30C>T           | p.His10His   | 11 | 6  |
| 1341148 | <i>esxL</i>      | Rv1198  | 1020 | 0.000019787 | 7   | missense_variant      | MODERATE | c.143C>T          | p.Ala48Val   | 15 | 6  |
| 1341152 | <i>esxL</i>      | Rv1198  | 1020 | 0.000019787 | 7   | synonymous_variant    | LOW      | c.147C>T          | p.Ala49Ala   | 15 | 6  |
| 1341344 | <i>Rv1194c</i>   | Rv1194c | 1017 | 1.50744E-08 | 7   | upstream_gene_variant | MODIFIER | c.-2831G>A        |              | 10 | 6  |
| 1355645 | <i>glgA</i>      | Rv1212c | 1017 | 1.50744E-08 | 7   | missense_variant      | MODERATE | c.17T>C           | p.Leu6Ser    | 10 | 6  |
| 1358237 | <i>Rv1215c</i>   | Rv1215c | 1227 | 2.99092E-06 | 10  | missense_variant      | MODERATE | c.1208C>T         | p.Pro403Leu  | 7  | 4  |
| 1358515 | <i>Rv1215c</i>   | Rv1215c | 1019 | 6.34814E-06 | 7   | missense_variant      | MODERATE | c.930G>T          | p.Glu310Asp  | 14 | 6  |
| 1385214 | <i>PE_PGRS23</i> | Rv1243c | 896  | 1.79921E-06 | 7   | synonymous_variant    | LOW      | c.1464C>T         | p.Ala488Ala  | 13 | 6  |
| 1394032 | <i>relB</i>      | Rv1247c | 1017 | 1.50744E-08 | 7   | upstream_gene_variant | MODIFIER | c.-4788G>A        |              | 10 | 6  |
| 1397606 | <i>Rv1251c</i>   | Rv1251c | 1231 | 1.71959E-05 | 10  | synonymous_variant    | LOW      | c.1635G>A         | p.Glu545Glu  | 8  | 4  |
| 1405701 | <i>Rv1257c</i>   | Rv1257c | 1019 | 6.34814E-06 | 7   | synonymous_variant    | LOW      | c.384T>C          | p.Tyr128Tyr  | 14 | 6  |
| 1411346 | <i>amiB2</i>     | Rv1263  | 1019 | 6.34814E-06 | 7   | synonymous_variant    | LOW      | c.916C>T          | p.Leu306Leu  | 14 | 6  |
| 1419193 | <i>lprA</i>      | Rv1270c | 617  | 1.59682E-09 | 215 | missense_variant      | MODERATE | c.556A>C          | p.Thr186Pro  | 0  | 2  |
| 1423583 | <i>Rv1273c</i>   | Rv1273c | 1227 | 2.99092E-06 | 10  | synonymous_variant    | LOW      | c.468G>A          | p.Ala156Ala  | 7  | 4  |
| 1436403 | <i>oppB</i>      | Rv1283c | 617  | 1.59682E-09 | 215 | missense_variant      | MODERATE | c.715C>T          | p.Leu239Phe  | 0  | 2  |
| 1437948 | <i>cysD</i>      | Rv1285  | 667  | 7.17007E-11 | 217 | missense_variant      | MODERATE | c.40A>C           | p.Ile14Leu   | 0  | 2  |
| 1497267 | <i>dinG</i>      | Rv1329c | 1017 | 1.50744E-08 | 7   | missense_variant      | MODERATE | c.1923G>C         | p.Trp641Cys  | 10 | 6  |
| 1545881 | <i>Rv1372</i>    | Rv1372  | 1017 | 1.50744E-08 | 7   | missense_variant      | MODERATE | c.1057A>G         | p.Ile353Val  | 10 | 6  |
| 1554418 | <i>pyrC</i>      | Rv1381  | 1231 | 1.71959E-05 | 10  | synonymous_variant    | LOW      | c.231G>A          | p.Ala77Ala   | 8  | 4  |
| 1574837 | <i>cyp132</i>    | Rv1394c | 617  | 1.59682E-09 | 215 | upstream_gene_variant | MODIFIER | c.-3868G>A        |              | 0  | 2  |
| 1598423 | <i>whiA</i>      | Rv1423  | 667  | 7.17007E-11 | 217 | missense_variant      | MODERATE | c.518C>A          | p.Ala173Asp  | 0  | 2  |
| 1600063 | <i>Rv1425</i>    | Rv1425  | 617  | 1.59682E-09 | 215 | missense_variant      | MODERATE | c.406A>C          | p.Met136Leu  | 0  | 2  |
| 1619591 | <i>PE_PGRS26</i> | Rv1441c | 667  | 7.17007E-11 | 217 | missense_variant      | MODERATE | c.94G>A           | p.Ala32Thr   | 0  | 2  |
| 1630688 | <i>PE_PGRS27</i> | Rv1450c | 1017 | 1.50744E-08 | 7   | missense_variant      | MODERATE | c.3940G>A         | p.Ala1314Thr | 10 | 6  |
| 1641019 | <i>Rv1455</i>    | Rv1455  | 631  | 0.00000078  | 281 | missense_variant      | MODERATE | c.340G>C          | p.Val114Leu  | 0  | 1  |
| 1651706 | <i>csd</i>       | Rv1464  | 1231 | 1.71959E-05 | 10  | synonymous_variant    | LOW      | c.189C>T          | p.Gly63Gly   | 8  | 4  |
| 1659662 | <i>trxBI</i>     | Rv1471  | 1017 | 1.50744E-08 | 7   | missense_variant      | MODERATE | c.293G>A          | p.Ser98Asn   | 10 | 6  |
| 1675193 | <i>hemZ</i>      | Rv1485  | 1231 | 1.71959E-05 | 10  | synonymous_variant    | LOW      | c.177C>G          | p.Arg59Arg   | 8  | 4  |
| 1677986 | <i>Rv1488</i>    | Rv1488  | 1017 | 1.50744E-08 | 7   | missense_variant      | MODERATE | c.590G>A          | p.Gly197Asp  | 10 | 6  |
| 1690284 | <i>Rv1498A</i>   | Rv1498A | 1019 | 6.34814E-06 | 7   | synonymous_variant    | LOW      | c.63G>A           | p.Ala21Ala   | 14 | 6  |
| 1690715 | <i>Rv1499</i>    | Rv1499  | 1017 | 1.50744E-08 | 7   | synonymous_variant    | LOW      | c.309C>A          | p.Leu103Leu  | 10 | 6  |
| 1731055 | <i>fadD24</i>    | Rv1529  | 1017 | 1.50744E-08 | 7   | synonymous_variant    | LOW      | c.1554C>T         | p.Asp518Asp  | 10 | 6  |

|         |                |         |      |             |     |                       |          |                          |              |    |    |
|---------|----------------|---------|------|-------------|-----|-----------------------|----------|--------------------------|--------------|----|----|
| 1735805 | <i>Rv1532c</i> | Rv1532c | 617  | 1.59682E-09 | 215 | upstream_gene_variant | MODIFIER | c.-2255C>T               |              | 0  | 2  |
| 1740691 | <i>dinX</i>    | Rv1537  | 667  | 7.17007E-11 | 217 | missense_variant      | MODERATE | c.836G>A                 | p.Gly279Asp  | 0  | 2  |
| 1753350 | <i>PPE21</i>   | Rv1548c | 1019 | 6.34814E-06 | 7   | upstream_gene_variant | MODIFIER | c.-22_-18delGCCGG        |              | 14 | 6  |
| 1760688 | <i>frdD</i>    | Rv1555  | 1231 | 1.71959E-05 | 10  | missense_variant      | MODERATE | c.137C>G                 | p.Pro46Arg   | 8  | 4  |
| 1789735 | <i>Rv1588c</i> | Rv1588c | 1017 | 1.50744E-08 | 7   | synonymous_variant    | LOW      | c.102G>A                 | p.Pro34Pro   | 10 | 6  |
| 1800902 | <i>hisC1</i>   | Rv1600  | 1013 | 1.46315E-05 | 7   | synonymous_variant    | LOW      | c.7A>C                   | p.Arg3Arg    | 1  | 2  |
| 1843620 | <i>Rv1637c</i> | Rv1637c | 1231 | 1.71959E-05 | 10  | missense_variant      | MODERATE | c.73A>G                  | p.Asn25Asp   | 8  | 4  |
| 1846335 | <i>uvrA</i>    | Rv1638  | 1017 | 1.50744E-08 | 7   | synonymous_variant    | LOW      | c.2595C>G                | p.Thr865Thr  | 10 | 6  |
| 1846481 | <i>uvrA</i>    | Rv1638  | 1017 | 1.50744E-08 | 7   | missense_variant      | MODERATE | c.2741T>C                | p.Ile914Thr  | 10 | 6  |
| 1886155 | <i>pks8</i>    | Rv1662  | 1231 | 1.71959E-05 | 10  | synonymous_variant    | LOW      | c.4452G>T                | p.Leu1484Leu | 8  | 4  |
| 1893183 | <i>cyp139</i>  | Rv1666c | 727  | 6.17792E-09 | 207 | missense_variant      | MODERATE | c.380G>A                 | p.Ser127Asn  | 1  | 2  |
| 1908105 | <i>Rv1683</i>  | Rv1683  | 667  | 7.17007E-11 | 217 | missense_variant      | MODERATE | c.512T>C                 | p.Val171Ala  | 0  | 2  |
| 1934875 | <i>cycA</i>    | Rv1704c | 617  | 1.59682E-09 | 215 | upstream_gene_variant | MODIFIER | c.-3419A>G               |              | 0  | 2  |
| 1942636 | <i>Rv1714</i>  | Rv1714  | 1017 | 1.50744E-08 | 7   | missense_variant      | MODERATE | c.784T>C                 | p.Tyr262His  | 10 | 6  |
| 1954655 | <i>Rv1729c</i> | Rv1729c | 391  | 7.33622E-13 | 15  | synonymous_variant    | LOW      | c.915G>T                 | p.Pro305Pro  | 0  | 2  |
| 1966742 | <i>Rv1739c</i> | Rv1739c | 1017 | 1.50744E-08 | 7   | missense_variant      | MODERATE | c.896G>C                 | p.Cys299Ser  | 10 | 6  |
| 1973987 | <i>Rv1747</i>  | Rv1747  | 1227 | 2.99092E-06 | 10  | missense_variant      | MODERATE | c.358C>T                 | p.Arg120Cys  | 7  | 4  |
|         |                |         |      |             |     |                       |          | c.150_151insTCGATGAACCAC |              |    |    |
|         |                |         |      |             |     |                       |          | CTGACATGACCCCATCCTTT     |              |    |    |
|         |                |         |      |             |     |                       |          | frameshift_variant&stop  |              |    |    |
|         |                |         |      |             |     |                       |          | CCAAGAAGTGGAGTCTCCG      |              |    |    |
| 1987546 | <i>pleD</i>    | Rv1755c | 390  | 1.30344E-06 | 331 | _gained               | HIGH     | GACATGCCGGGGCGGTTC       | p.Ala51fs    | 0  | 1  |
| 2032791 | <i>eccD5</i>   | Rv1795  | 1017 | 1.50744E-08 | 7   | synonymous_variant    | LOW      | c.552C>T                 | p.Val184Val  | 10 | 6  |
| 2043141 | <i>PPE29</i>   | Rv1801  | 1231 | 1.71959E-05 | 10  | missense_variant      | MODERATE | c.1141C>T                | p.Arg381Cys  | 8  | 4  |
| 2044116 | <i>PPE30</i>   | Rv1802  | 1227 | 2.99092E-06 | 10  | missense_variant      | MODERATE | c.733G>A                 | p.Glu245Lys  | 7  | 4  |
| 2044884 | <i>PE20</i>    | Rv1806  | 1019 | 6.34814E-06 | 7   | upstream_gene_variant | MODIFIER | c.-3188C>A               |              | 14 | 6  |
| 2056866 | <i>erg3</i>    | Rv1814  | 391  | 7.33622E-13 | 15  | missense_variant      | MODERATE | c.346C>T                 | p.Arg116Trp  | 0  | 2  |
| 2056902 | <i>erg3</i>    | Rv1814  | 617  | 1.59682E-09 | 215 | missense_variant      | MODERATE | c.382A>G                 | p.Ser128Gly  | 0  | 2  |
| 2078585 | <i>gcvB</i>    | Rv1832  | 1019 | 6.34814E-06 | 7   | synonymous_variant    | LOW      | c.2709C>T                | p.Ala903Ala  | 14 | 6  |
| 2081011 | <i>Rv1835c</i> | Rv1835c | 631  | 0.00000078  | 281 | frameshift_variant    | HIGH     | c.1576_1577insATACA      | p.Ile526fs   | 0  | 1  |
| 2093991 | <i>gnd1</i>    | Rv1844c | 1231 | 1.71959E-05 | 10  | missense_variant      | MODERATE | c.1198G>A                | p.Ala400Thr  | 8  | 4  |
| 2129998 | <i>Rv1879</i>  | Rv1879  | 391  | 7.33622E-13 | 15  | stop_gained           | HIGH     | c.622C>T                 | p.Arg208*    | 0  | 2  |
| 2138730 | <i>Rv1889c</i> | Rv1889c | 1231 | 1.71959E-05 | 10  | missense_variant      | MODERATE | c.288C>A                 | p.Asp96Glu   | 8  | 4  |
| 2142602 | <i>Rv1895</i>  | Rv1895  | 1017 | 1.50744E-08 | 7   | missense_variant      | MODERATE | c.82G>A                  | p.Val28Met   | 10 | 6  |
| 2155168 | <i>katG</i>    | Rv1908c | 1776 | 0.00000005  | 15  | missense_variant      | MODERATE | c.944G>C                 | p.Ser315Thr  | 72 | 15 |
| 2191082 | <i>ephB</i>    | Rv1938  | 391  | 7.33622E-13 | 15  | missense_variant      | MODERATE | c.56C>T                  | p.Ala19Val   | 0  | 2  |
| 2193886 | <i>Rv1941</i>  | Rv1941  | 1227 | 2.99092E-06 | 10  | missense_variant      | MODERATE | c.223G>A                 | p.Ala75Thr   | 7  | 4  |
| 2208493 | <i>yrbE3A</i>  | Rv1964  | 1017 | 1.50744E-08 | 7   | missense_variant      | MODERATE | c.794C>T                 | p.Ser265Phe  | 10 | 6  |
| 2211210 | <i>mce3B</i>   | Rv1967  | 1017 | 1.50744E-08 | 7   | missense_variant      | MODERATE | c.610A>G                 | p.Asn204Asp  | 10 | 6  |
| 2212028 | <i>mce3C</i>   | Rv1968  | 1017 | 1.50744E-08 | 7   | missense_variant      | MODERATE | c.403C>T                 | p.Pro135Ser  | 10 | 6  |
| 2220482 | <i>Rv1977</i>  | Rv1977  | 1231 | 1.71959E-05 | 10  | frameshift_variant    | HIGH     | c.731delA                | p.Asn244fs   | 8  | 4  |
| 2226037 | <i>vapB36</i>  | Rv1982A | 1017 | 1.50744E-08 | 7   | missense_variant      | MODERATE | c.65A>G                  | p.His22Arg   | 10 | 6  |
| 2251313 | <i>Rv2005c</i> | Rv2005c | 1231 | 1.71959E-05 | 10  | missense_variant      | MODERATE | c.571A>G                 | p.Ile191Val  | 8  | 4  |
| 2255482 | <i>otsB1</i>   | Rv2006  | 1231 | 1.71959E-05 | 10  | missense_variant      | MODERATE | c.3481G>A                | p.Gly1161Ser | 8  | 4  |
|         |                |         |      |             |     |                       |          | c.206_207insCCGCCCGGTG   |              |    |    |
|         |                |         |      |             |     |                       |          | AGTCCGGAGACTCTCTGATC     |              |    |    |
|         |                |         |      |             |     |                       |          | frameshift_variant&stop  |              |    |    |
|         |                |         |      |             |     |                       |          | TGAGACCTCAGCCGGCGGC      |              |    |    |
|         |                |         |      |             |     |                       |          | _gained                  |              |    |    |
| 2263631 | <i>Rv2016</i>  | Rv2016  | 666  | 0.000009805 | 217 | frameshift_variant    | HIGH     | TGGTCTCT                 | p.Lys69fs    | 0  | 1  |
| 2284326 | <i>Rv2038c</i> | Rv2038c | 1019 | 6.34814E-06 | 7   | synonymous_variant    | LOW      | c.471C>T                 | p.Phe157Phe  | 14 | 6  |
| 2284652 | <i>Rv2038c</i> | Rv2038c | 1231 | 1.71959E-05 | 10  | synonymous_variant    | LOW      | c.145C>A                 | p.Arg49Arg   | 8  | 4  |
| 2288820 | <i>pncA</i>    | Rv2043c | 668  | 4.91945E-07 | 217 | missense_variant      | MODERATE | c.422A>C                 | p.Gln141Pro  | 1  | 2  |



|         |                  |         |      |             |     |                        |          |                           |                    |    |   |
|---------|------------------|---------|------|-------------|-----|------------------------|----------|---------------------------|--------------------|----|---|
| 2318206 | <i>cobN</i>      | Rv2062c | 1231 | 1.71959E-05 | 10  | missense_variant       | MODERATE | c.2548T>G                 | p.Trp850Gly        | 8  | 4 |
| 2318825 | <i>cobN</i>      | Rv2062c | 1017 | 1.50744E-08 | 7   | synonymous_variant     | LOW      | c.1929C>T                 | p.Asp643Asp        | 10 | 6 |
| 2326293 | <i>blaC</i>      | Rv2068c | 1017 | 1.50744E-08 | 7   | missense_variant       | MODERATE | c.517G>C                  | p.Asp173His        | 10 | 6 |
| 2344942 | <i>pknJ</i>      | Rv2088  | 1017 | 1.50744E-08 | 7   | missense_variant       | MODERATE | c.532G>A                  | p.Ala178Thr        | 10 | 6 |
| 2358525 | <i>Rv2100</i>    | Rv2100  | 1231 | 1.71959E-05 | 10  | missense_variant       | MODERATE | c.137A>C                  | p.Asp46Ala         | 8  | 4 |
| 2383160 | <i>metH</i>      | Rv2124c | 1019 | 6.34814E-06 | 7   | missense_variant       | MODERATE | c.2908G>A                 | p.Gly970Ser        | 14 | 6 |
| 2403177 | <i>Rv2143</i>    | Rv2143  | 391  | 7.33622E-13 | 15  | stop_gained            | HIGH     | c.201G>A                  | p.Trp67*           | 0  | 2 |
| 2408079 | <i>yfiH</i>      | Rv2149c | 1227 | 2.99092E-06 | 10  | missense_variant       | MODERATE | c.296T>C                  | p.Val99Ala         | 7  | 4 |
| 2423422 | <i>PE_PGRS38</i> | Rv2162c | 391  | 7.33622E-13 | 15  | conservative_inframe_d | MODERATE | c.1309_1416del            | p.Asn437_Gly472del | 0  | 2 |
| 2427457 | <i>Rv2164c</i>   | Rv2164c | 666  | 0.000009805 | 217 | deletion               | MODERATE | c.782C>T                  | p.Pro261Leu        | 0  | 1 |
| 2438670 | <i>pknL</i>      | Rv2176  | 470  | 1.55984E-09 | 216 | missense_variant       | MODERATE | c.730G>A                  | p.Gly244Ser        | 0  | 2 |
| 2441637 | <i>aroG</i>      | Rv2178c | 1017 | 1.50744E-08 | 7   | missense_variant       | MODERATE | c.84C>G                   | p.Ala28Ala         | 10 | 6 |
| 2449325 | <i>fadD15</i>    | Rv2187  | 617  | 1.59682E-09 | 215 | synonymous_variant     | LOW      | c.1166T>C                 | p.Phe389Ser        | 0  | 2 |
| 2453147 | <i>Rv2190c</i>   | Rv2190c | 1017 | 1.50744E-08 | 7   | missense_variant       | MODERATE | c.126C>A                  | p.Asp42Glu         | 10 | 6 |
| 2500964 | <i>Rv2227</i>    | Rv2227  | 1231 | 1.71959E-05 | 10  | missense_variant       | MODERATE | c.34C>G                   | p.Arg12Gly         | 8  | 4 |
| 2502324 | <i>Rv2228c</i>   | Rv2228c | 1017 | 1.50744E-08 | 7   | missense_variant       | MODERATE | c.415G>A                  | p.Ala139Thr        | 10 | 6 |
| 2562288 | <i>cdh</i>       | Rv2289  | 381  | 1.75432E-13 | 299 | missense_variant       | MODERATE | c.614A>G                  | p.Asp205Gly        | 0  | 2 |
| 2586925 | <i>Rv2314c</i>   | Rv2314c | 1017 | 1.50744E-08 | 7   | missense_variant       | MODERATE | c.366G>A                  | p.Gly122Gly        | 10 | 6 |
| 2595142 | <i>rocD1</i>     | Rv2322c | 1017 | 1.50744E-08 | 7   | synonymous_variant     | LOW      | c.223A>G                  | p.Thr75Ala         | 10 | 6 |
| 2605885 | <i>mez</i>       | Rv2332  | 1227 | 2.99092E-06 | 10  | missense_variant       | MODERATE | c.778G>C                  | p.Val260Leu        | 7  | 4 |
| 2610381 | <i>cysE</i>      | Rv2335  | 1231 | 1.71959E-05 | 10  | missense_variant       | MODERATE | c.650C>T                  | p.Pro217Leu        | 8  | 4 |
| 2614232 | <i>Rv2337c</i>   | Rv2337c | 1019 | 6.34814E-06 | 7   | missense_variant       | MODERATE | c.650C>T                  | p.Pro217Leu        | 8  | 4 |
| 2628893 | <i>pleB</i>      | Rv2350c | 1223 | 1.08236E-05 | 10  | upstream_gene_variant  | MODIFIER | c.-1245G>T                |                    | 14 | 6 |
|         |                  |         |      |             |     | frameshift_variant     | HIGH     | c.1426_1427insGTTCAC      | p.Ala476fs         | 4  | 3 |
|         |                  |         |      |             |     |                        |          | c.1424_1425insTGAACCCACCT |                    |    |   |
|         |                  |         |      |             |     |                        |          | GACATGACCCCATCCTTTCC      |                    |    |   |
|         |                  |         |      |             |     |                        |          | AAGAAGTGGAGTCTCCGGA       |                    |    |   |
| 2628895 | <i>pleB</i>      | Rv2350c | 1222 | 1.14389E-06 | 10  | frameshift_variant     | HIGH     | CATGCCGGGG                | p.Ala476fs         | 1  | 2 |
| 2662802 | <i>mbtE</i>      | Rv2380c | 1019 | 6.34814E-06 | 7   | synonymous_variant     | LOW      | c.4314C>T                 | p.Phe1438Phe       | 14 | 6 |
| 2677876 | <i>mbtJ</i>      | Rv2385  | 1227 | 2.99092E-06 | 10  | missense_variant       | MODERATE | c.148G>A                  | p.Asp50Asn         | 7  | 4 |
| 2701529 | <i>lepA</i>      | Rv2404c | 667  | 7.17007E-11 | 217 | missense_variant       | MODERATE | c.1720T>G                 | p.Phe574Val        | 0  | 2 |
| 2714526 | <i>eis</i>       | Rv2416c | 1231 | 1.71959E-05 | 10  | frameshift_variant     | HIGH     | c.805_806delAC            | p.Thr269fs         | 8  | 4 |
| 2720993 | <i>Rv2424c</i>   | Rv2424c | 1017 | 1.50744E-08 | 7   | missense_variant       | MODERATE | c.785G>C                  | p.Gly262Ala        | 10 | 6 |
| 2733749 | <i>rbsK</i>      | Rv2436  | 1227 | 2.99092E-06 | 10  | missense_variant       | MODERATE | c.520G>A                  | p.Gly174Ser        | 7  | 4 |
| 2739546 | <i>obg</i>       | Rv2440c | 1231 | 1.71959E-05 | 10  | synonymous_variant     | LOW      | c.141C>G                  | p.Val47Val         | 8  | 4 |
| 2757836 | <i>Rv2456c</i>   | Rv2456c | 1017 | 1.50744E-08 | 7   | synonymous_variant     | LOW      | c.357T>G                  | p.Ala119Ala        | 10 | 6 |
| 2766789 | <i>lipP</i>      | Rv2463  | 667  | 7.17007E-11 | 217 | missense_variant       | MODERATE | c.1135G>T                 | p.Val379Phe        | 0  | 2 |
| 2774856 | <i>aglA</i>      | Rv2471  | 617  | 1.59682E-09 | 215 | synonymous_variant     | LOW      | c.1293C>A                 | p.Gly431Gly        | 0  | 2 |
| 2775156 | <i>aglA</i>      | Rv2471  | 470  | 1.55984E-09 | 216 | frameshift_variant     | HIGH     | c.1594_1595insAT          | p.Leu532fs         | 0  | 2 |
| 2803670 | <i>PE_PGRS43</i> | Rv2490c | 893  | 1.94095E-07 | 7   | missense_variant       | MODERATE | c.2567A>G                 | p.Asp856Gly        | 9  | 6 |
| 2835894 | <i>PE26</i>      | Rv2519  | 1231 | 1.71959E-05 | 10  | missense_variant       | MODERATE | c.110C>T                  | p.Thr37Ile         | 8  | 4 |
| 2840109 | <i>ldtB</i>      | Rv2518c | 1227 | 2.99092E-06 | 10  | upstream_gene_variant  | MODIFIER | c.-4774C>T                |                    | 7  | 4 |
| 2842880 | <i>fas</i>       | Rv2524c | 1017 | 1.50744E-08 | 7   | synonymous_variant     | LOW      | c.6453C>T                 | p.Leu2151Leu       | 10 | 6 |
| 2859133 | <i>efp</i>       | Rv2534c | 1017 | 1.50744E-08 | 7   | missense_variant       | MODERATE | c.158C>T                  | p.Thr53Met         | 10 | 6 |
| 2867088 | <i>lppA</i>      | Rv2543  | 1017 | 1.50744E-08 | 7   | synonymous_variant     | LOW      | c.621G>C                  | p.Pro207Pro        | 10 | 6 |
| 2876938 | <i>Rv2556c</i>   | Rv2556c | 1017 | 1.50744E-08 | 7   | missense_variant       | MODERATE | c.28C>T                   | p.Arg10Cys         | 10 | 6 |
| 2876955 | <i>Rv2556c</i>   | Rv2556c | 391  | 7.33622E-13 | 15  | missense_variant       | MODERATE | c.11T>C                   | p.Val4Ala          | 0  | 2 |
| 2888827 | <i>Rv2566</i>    | Rv2566  | 1227 | 2.99092E-06 | 10  | missense_variant       | MODERATE | c.2455G>A                 | p.Gly819Ser        | 7  | 4 |
| 2947988 | <i>Rv2621c</i>   | Rv2621c | 1017 | 1.50744E-08 | 7   | synonymous_variant     | LOW      | c.571T>C                  | p.Leu191Leu        | 10 | 6 |
| 2964867 | <i>PE_PGRS46</i> | Rv2634c | 1017 | 1.50744E-08 | 7   | upstream_gene_variant  | MODIFIER | c.-2426G>A                |                    | 10 | 6 |
| 2980684 | <i>Rv2659c</i>   | Rv2659c | 1019 | 6.34814E-06 | 7   | synonymous_variant     | LOW      | c.135C>T                  | p.Ile45Ile         | 14 | 6 |

|         |                |         |      |             |     |                         |          |                  |             |    |   |
|---------|----------------|---------|------|-------------|-----|-------------------------|----------|------------------|-------------|----|---|
| 2984903 | <i>Rv2668</i>  | Rv2668  | 1017 | 1.50744E-08 | 7   | synonymous_variant      | LOW      | c.171C>T         | p.Val57Val  | 10 | 6 |
| 3000401 | <i>Rv2683</i>  | Rv2683  | 1231 | 1.71959E-05 | 10  | missense_variant        | MODERATE | c.290G>A         | p.Cys97Tyr  | 8  | 4 |
| 3001584 | <i>arsA</i>    | Rv2684  | 617  | 1.59682E-09 | 215 | missense_variant        | MODERATE | c.971C>T         | p.Ser324Phe | 0  | 2 |
| 3007119 | <i>Rv2686c</i> | Rv2686c | 1230 | 3.21937E-06 | 10  | upstream_gene_variant   | MODIFIER | c.-3191_-3082del |             | 7  | 4 |
| 3042024 | <i>Rv2729c</i> | Rv2729c | 1017 | 1.50744E-08 | 7   | missense_variant        | MODERATE | c.452T>G         | p.Leu151Arg | 10 | 6 |
| 3046181 | <i>Rv2733c</i> | Rv2733c | 667  | 7.17007E-11 | 217 | missense_variant        | MODERATE | c.344G>A         | p.Arg115His | 0  | 2 |
| 3057998 | <i>35kd_ag</i> | Rv2744c | 1017 | 1.50744E-08 | 7   | missense_variant        | MODERATE | c.66G>T          | p.Glu22Asp  | 10 | 6 |
| 3068497 | <i>hsdM</i>    | Rv2756c | 1231 | 1.71959E-05 | 10  | synonymous_variant      | LOW      | c.1587A>G        | p.Glu529Glu | 8  | 4 |
| 3079112 | <i>thyA</i>    | Rv2764c | 1019 | 6.34814E-06 | 7   | upstream_gene_variant   | MODIFIER | c.-4641C>T       |             | 14 | 6 |
| 3089878 | <i>pepR</i>    | Rv2782c | 1017 | 1.50744E-08 | 7   | missense_variant        | MODERATE | c.484G>A         | p.Asp162Asn | 10 | 6 |
| 3099391 | <i>ltp1</i>    | Rv2790c | 470  | 1.55984E-09 | 216 | missense_variant        | MODERATE | c.779C>T         | p.Thr260Ile | 0  | 2 |
| 3141737 | <i>ugpA</i>    | Rv2835c | 1231 | 1.71959E-05 | 10  | synonymous_variant      | LOW      | c.486T>C         | p.Asp162Asp | 8  | 4 |
| 3142701 | <i>dinF</i>    | Rv2836c | 1017 | 1.50744E-08 | 7   | missense_variant        | MODERATE | c.928C>T         | p.Arg310Trp | 10 | 6 |
| 3160421 | <i>Rv2851c</i> | Rv2851c | 391  | 7.33622E-13 | 15  | missense_variant        | MODERATE | c.101C>A         | p.Ala34Asp  | 0  | 2 |
| 3177276 | <i>glnA4</i>   | Rv2860c | 470  | 1.55984E-09 | 216 | upstream_gene_variant   | MODIFIER | c.-4276C>T       |             | 0  | 2 |
| 3193202 | <i>Rv2877c</i> | Rv2877c | 1231 | 1.71959E-05 | 10  | upstream_gene_variant   | MODIFIER | c.-4331C>T       |             | 8  | 4 |
| 3197045 | <i>amiC</i>    | Rv2888c | 1017 | 1.50744E-08 | 7   | missense_variant        | MODERATE | c.1241T>C        | p.Val414Ala | 10 | 6 |
| 3213678 | <i>lepB</i>    | Rv2903c | 1227 | 2.99092E-06 | 10  | synonymous_variant      | LOW      | c.177C>G         | p.Pro59Pro  | 7  | 4 |
| 3218997 | <i>dacB2</i>   | Rv2911  | 1231 | 1.71959E-05 | 10  | missense_variant        | MODERATE | c.659T>A         | p.Leu220Gln | 8  | 4 |
| 3257937 | <i>ppsC</i>    | Rv2933  | 1017 | 1.50744E-08 | 7   | missense_variant        | MODERATE | c.2253C>G        | p.Phe751Leu | 10 | 6 |
| 3287430 | <i>mmpL7</i>   | Rv2942  | 1231 | 1.71959E-05 | 10  | synonymous_variant      | LOW      | c.2361C>T        | p.His787His | 8  | 4 |
| 3298532 | <i>fadD22</i>  | Rv2948c | 1017 | 1.50744E-08 | 7   | stop_gained             | HIGH     | c.1423C>T        | p.Arg475*   | 10 | 6 |
| 3300005 | <i>Rv2949c</i> | Rv2949c | 1231 | 1.71959E-05 | 10  | missense_variant        | MODERATE | c.566G>T         | p.Trp189Leu | 8  | 4 |
| 3304104 | <i>Rv2951c</i> | Rv2951c | 1017 | 1.50744E-08 | 7   | missense_variant        | MODERATE | c.145C>T         | p.Pro49Ser  | 10 | 6 |
| 3365184 | <i>lppZ</i>    | Rv3006  | 1019 | 6.34814E-06 | 7   | missense_variant        | MODERATE | c.476T>C         | p.Ile159Thr | 14 | 6 |
| 3368380 | <i>gatB</i>    | Rv3009c | 1017 | 1.50744E-08 | 7   | synonymous_variant      | LOW      | c.414G>T         | p.Arg138Arg | 10 | 6 |
| 3405338 | <i>fecB</i>    | Rv3044  | 1017 | 1.50744E-08 | 7   | missense_variant        | MODERATE | c.203C>A         | p.Pro68Gln  | 10 | 6 |
| 3413574 | <i>nrdE</i>    | Rv3051c | 1231 | 1.71959E-05 | 10  | missense_variant        | MODERATE | c.593C>G         | p.Ala198Gly | 8  | 4 |
| 3430006 | <i>Rv3064c</i> | Rv3064c | 1017 | 1.50744E-08 | 7   | missense_variant        | MODERATE | c.245C>T         | p.Ser82Leu  | 10 | 6 |
| 3437020 | <i>Rv3074</i>  | Rv3074  | 1019 | 6.34814E-06 | 7   | missense_variant        | MODERATE | c.242G>A         | p.Arg81Gln  | 14 | 6 |
| 3443266 | <i>pknK</i>    | Rv3080c | 1017 | 1.50744E-08 | 7   | missense_variant        | MODERATE | c.2723C>T        | p.Ser908Leu | 10 | 6 |
| 3451186 | <i>Rv3085</i>  | Rv3085  | 1227 | 2.99092E-06 | 10  | synonymous_variant      | LOW      | c.267C>T         | p.Asn89Asn  | 7  | 4 |
| 3451440 | <i>Rv3085</i>  | Rv3085  | 1017 | 1.50744E-08 | 7   | missense_variant        | MODERATE | c.521T>G         | p.Leu174Arg | 10 | 6 |
| 3462822 | <i>Rv3094c</i> | Rv3094c | 1231 | 1.71959E-05 | 10  | missense_variant        | MODERATE | c.1070C>A        | p.Ala357Glu | 8  | 4 |
| 3538141 | <i>Rv3169</i>  | Rv3169  | 1017 | 1.50744E-08 | 7   | missense_variant        | MODERATE | c.904G>C         | p.Gly302Arg | 10 | 6 |
|         |                |         |      |             |     | splice_region_variant&s |          |                  |             |    |   |
| 3540882 | <i>Rv3172c</i> | Rv3172c | 1231 | 1.71959E-05 | 10  | top_retained_variant    | LOW      | c.483A>G         | p.Ter161Ter | 8  | 4 |
| 3545427 | <i>hpx</i>     | Rv3171c | 1227 | 2.99092E-06 | 10  | upstream_gene_variant   | MODIFIER | c.-4682A>G       |             | 7  | 4 |
| 3570896 | <i>uvrD2</i>   | Rv3198c | 1231 | 1.71959E-05 | 10  | synonymous_variant      | LOW      | c.316C>A         | p.Arg106Arg | 8  | 4 |
| 3575931 | <i>Rv3201c</i> | Rv3201c | 1017 | 1.50744E-08 | 7   | missense_variant        | MODERATE | c.1106A>C        | p.Glu369Ala | 10 | 6 |
| 3583543 | <i>moeB1</i>   | Rv3206c | 1017 | 1.50744E-08 | 7   | synonymous_variant      | LOW      | c.168C>T         | p.Pro56Pro  | 10 | 6 |
| 3594831 | <i>Rv3218</i>  | Rv3218  | 391  | 7.33622E-13 | 15  | missense_variant        | MODERATE | c.364G>A         | p.Asp122Asn | 0  | 2 |
| 3604064 | <i>aroA</i>    | Rv3227  | 67   | 5.28411E-07 | 324 | missense_variant        | MODERATE | c.688G>T         | p.Ala230Ser | 0  | 1 |
| 3607420 | <i>Rv3230c</i> | Rv3230c | 1016 | 1.94095E-09 | 7   | frameshift_variant      | HIGH     | c.834delC        | p.Ser279fs  | 9  | 6 |
| 3640321 | <i>manA</i>    | Rv3255c | 391  | 7.33622E-13 | 15  | upstream_gene_variant   | MODIFIER | c.-4054A>G       |             | 0  | 2 |
| 3684649 | <i>atsB</i>    | Rv3299c | 1231 | 1.71959E-05 | 10  | missense_variant        | MODERATE | c.1315C>T        | p.Arg439Trp | 8  | 4 |

|         |                  |         |      |             |     |                         |          |                                                                                                                                                                                                                         |                                                                                                                   |    |   |
|---------|------------------|---------|------|-------------|-----|-------------------------|----------|-------------------------------------------------------------------------------------------------------------------------------------------------------------------------------------------------------------------------|-------------------------------------------------------------------------------------------------------------------|----|---|
|         |                  |         |      |             |     |                         |          | c.-2311_-<br>2310insACAGGGGAGCTGTCC<br>GAGAGGTTGACGGCACTGC<br>CCGGGTGGGAGCTCGTCTCGA<br>TGGAAAGCTCCGCCACACA<br>TTTGGGTTTGGGAGCTTTCGA<br>TCAATCCATGAAATTTGTGG<br>CGAAGATCGCCGCCATCGC<br>CGACAAATCAATCATCACC<br>CCGATATCTG |                                                                                                                   |    |   |
| 3710380 | <i>vapC44</i>    | Rv3320c | 391  | 7.33622E-13 | 15  | upstream_gene_variant   | MODIFIER |                                                                                                                                                                                                                         |                                                                                                                   | 0  | 2 |
| 3721174 | <i>Rv3333c</i>   | Rv3333c | 1231 | 1.71959E-05 | 10  | upstream_gene_variant   | MODIFIER | c.-392A>C                                                                                                                                                                                                               |                                                                                                                   | 8  | 4 |
|         |                  |         |      |             |     | stop_lost&splice_region |          |                                                                                                                                                                                                                         |                                                                                                                   |    |   |
| 3724042 | <i>Rv3337</i>    | Rv3337  | 1231 | 1.71959E-05 | 10  | _variant                | HIGH     | c.387A>G                                                                                                                                                                                                                | p.Ter129Trpext*?<br>p.Asp17_Gly18insGluPr<br>oProAspMetThrProSerP<br>heProArgThrGlyValSer<br>GlyHisAlaGlyAlaValHi | 8  | 4 |
|         |                  |         |      |             |     | disruptive_inframe_inse |          |                                                                                                                                                                                                                         |                                                                                                                   |    |   |
| 3725794 | <i>icd1</i>      | Rv3339c | 1226 | 3.13154E-08 | 10  | rtion                   | MODERATE | GCCGGGGCGGTTACGA                                                                                                                                                                                                        | sAsp                                                                                                              | 5  | 4 |
| 3734943 | <i>PPE54</i>     | Rv3343c | 1017 | 1.50744E-08 | 7   | missense_variant        | MODERATE | c.1993A>C                                                                                                                                                                                                               | p.Thr665Pro                                                                                                       | 10 | 6 |
| 3736108 | <i>PPE54</i>     | Rv3343c | 1228 | 1.21361E-05 | 10  | synonymous_variant      | LOW      | c.828T>C                                                                                                                                                                                                                | p.Ile276Ile                                                                                                       | 8  | 4 |
| 3736828 | <i>PPE54</i>     | Rv3343c | 1231 | 1.71959E-05 | 10  | synonymous_variant      | LOW      | c.108C>A                                                                                                                                                                                                                | p.Ala36Ala                                                                                                        | 8  | 4 |
| 3746219 | <i>PPE55</i>     | Rv3347c | 631  | 0.00000078  | 281 | synonymous_variant      | LOW      | c.6966G>A                                                                                                                                                                                                               | p.Ala2322Ala                                                                                                      | 0  | 1 |
| 3766200 | <i>PPE56</i>     | Rv3350c | 1017 | 1.50744E-08 | 7   | synonymous_variant      | LOW      | c.903C>A                                                                                                                                                                                                                | p.Gly301Gly                                                                                                       | 10 | 6 |
| 3770743 | <i>PPE56</i>     | Rv3350c | 1231 | 1.71959E-05 | 10  | upstream_gene_variant   | MODIFIER | c.-3641A>G                                                                                                                                                                                                              |                                                                                                                   | 8  | 4 |
| 3778338 | <i>Rv3361c</i>   | Rv3361c | 391  | 7.33622E-13 | 15  | upstream_gene_variant   | MODIFIER | c.-4771C>T                                                                                                                                                                                                              |                                                                                                                   | 0  | 2 |
| 3782763 | <i>dnaE2</i>     | Rv3370c | 667  | 7.17007E-11 | 217 | missense_variant        | MODERATE | c.1978C>G                                                                                                                                                                                                               | p.Pro660Ala                                                                                                       | 0  | 2 |
| 3784399 | <i>dnaE2</i>     | Rv3370c | 617  | 1.59682E-09 | 215 | synonymous_variant      | LOW      | c.342C>T                                                                                                                                                                                                                | p.Ala114Ala                                                                                                       | 0  | 2 |
| 3794515 | <i>dxs2</i>      | Rv3379c | 1017 | 1.50744E-08 | 7   | frameshift_variant      | HIGH     | c.352dupG                                                                                                                                                                                                               | p.Ala118fs                                                                                                        | 10 | 6 |
| 3818638 | <i>Rv3401</i>    | Rv3401  | 1019 | 6.34814E-06 | 7   | synonymous_variant      | LOW      | c.597G>A                                                                                                                                                                                                                | p.Glu199Glu                                                                                                       | 14 | 6 |
| 3819448 | <i>Rv3401</i>    | Rv3401  | 1227 | 2.99092E-06 | 10  | frameshift_variant      | HIGH     | c.1410delG                                                                                                                                                                                                              | p.His471fs                                                                                                        | 7  | 4 |
| 3844733 | <i>Rv3422c</i>   | Rv3422c | 1231 | 1.71959E-05 | 10  | upstream_gene_variant   | MODIFIER | c.-4536T>G                                                                                                                                                                                                              |                                                                                                                   | 8  | 4 |
| 3859614 | <i>Rv3439c</i>   | Rv3439c | 1017 | 1.50744E-08 | 7   | missense_variant        | MODERATE | c.49G>A                                                                                                                                                                                                                 | p.Ala17Thr                                                                                                        | 10 | 6 |
| 3866167 | <i>eccC4</i>     | Rv3447c | 1227 | 2.99092E-06 | 10  | missense_variant        | MODERATE | c.2072A>G                                                                                                                                                                                                               | p.His691Arg                                                                                                       | 7  | 4 |
| 3872538 | <i>eccC4</i>     | Rv3447c | 1017 | 1.50744E-08 | 7   | upstream_gene_variant   | MODIFIER | c.-4300C>T                                                                                                                                                                                                              |                                                                                                                   | 10 | 6 |
| 3893944 | <i>Rv3471c</i>   | Rv3471c | 631  | 0.00000078  | 281 | upstream_gene_variant   | MODIFIER | c.-4603C>T                                                                                                                                                                                                              |                                                                                                                   | 0  | 1 |
| 3899672 | <i>Rv3480c</i>   | Rv3480c | 1231 | 1.71959E-05 | 10  | missense_variant        | MODERATE | c.731G>A                                                                                                                                                                                                                | p.Arg244His                                                                                                       | 8  | 4 |
| 3914154 | <i>lprN</i>      | Rv3495c | 1227 | 2.99092E-06 | 10  | synonymous_variant      | LOW      | c.381C>T                                                                                                                                                                                                                | p.Thr127Thr                                                                                                       | 7  | 4 |
|         |                  |         |      |             |     | conservative_inframe_d  |          |                                                                                                                                                                                                                         |                                                                                                                   |    |   |
| 3936503 | <i>PE_PGRS54</i> | Rv3508  | 1229 | 3.11448E-06 | 10  | letion                  | MODERATE | c.5512_5628del                                                                                                                                                                                                          | p.Asn1838_Gly1876del                                                                                              | 7  | 4 |
| 3941595 | <i>PE_PGRS55</i> | Rv3511  | 631  | 0.00000078  | 281 | missense_variant        | MODERATE | c.1979C>A                                                                                                                                                                                                               | p.Thr660Asn                                                                                                       | 0  | 1 |
| 3941604 | <i>PE_PGRS55</i> | Rv3511  | 631  | 0.00000078  | 281 | missense_variant        | MODERATE | c.1988A>C                                                                                                                                                                                                               | p.Lys663Thr                                                                                                       | 0  | 1 |
| 3941605 | <i>PE_PGRS55</i> | Rv3511  | 631  | 0.00000078  | 281 | missense_variant        | MODERATE | c.1989A>C                                                                                                                                                                                                               | p.Lys663Asn                                                                                                       | 0  | 1 |
| 3944340 | <i>PE_PGRS56</i> | Rv3512  | 893  | 1.94095E-09 | 7   | missense_variant        | MODERATE | c.2617G>A                                                                                                                                                                                                               | p.Asp873Asn                                                                                                       | 9  | 6 |
|         |                  |         |      |             |     | disruptive_inframe_dele |          |                                                                                                                                                                                                                         |                                                                                                                   |    |   |
| 3944342 | <i>PE_PGRS56</i> | Rv3512  | 893  | 1.94095E-09 | 7   | tion                    | MODERATE | c.2634_2642delCAACGGCGG                                                                                                                                                                                                 | p.Asn879_Gly881del                                                                                                | 9  | 6 |
| 3944342 | <i>PE_PGRS56</i> | Rv3512  | 893  | 1.94095E-09 | 7   | synonymous_variant      | LOW      | c.2619T>C                                                                                                                                                                                                               | p.Asp873Asp                                                                                                       | 9  | 6 |
| 3949345 | <i>PE_PGRS57</i> | Rv3514  | 895  | 4.40448E-07 | 7   | frameshift_variant      | HIGH     | c.3553_3554delAA                                                                                                                                                                                                        | p.Asn1185fs                                                                                                       | 12 | 6 |
| 3963393 | <i>kshA</i>      | Rv3526  | 1017 | 1.50744E-08 | 7   | missense_variant        | MODERATE | c.955C>A                                                                                                                                                                                                                | p.Leu319Met                                                                                                       | 10 | 6 |
| 3989051 | <i>Rv3549c</i>   | Rv3549c | 1017 | 1.50744E-08 | 7   | synonymous_variant      | LOW      | c.48G>A                                                                                                                                                                                                                 | p.Gly16Gly                                                                                                        | 10 | 6 |
| 4015697 | <i>fadE34</i>    | Rv3573c | 1017 | 1.50744E-08 | 7   | synonymous_variant      | LOW      | c.516C>T                                                                                                                                                                                                                | p.Val172Val                                                                                                       | 10 | 6 |
| 4018615 | <i>lppH</i>      | Rv3576  | 1017 | 1.50744E-08 | 7   | synonymous_variant      | LOW      | c.258G>A                                                                                                                                                                                                                | p.Lys86Lys                                                                                                        | 10 | 6 |

|         |                  |         |      |             |     |                       |          |            |             |    |   |
|---------|------------------|---------|------|-------------|-----|-----------------------|----------|------------|-------------|----|---|
| 4024520 | <i>ispD</i>      | Rv3582c | 1019 | 6.34814E-06 | 7   | synonymous_variant    | LOW      | c.520C>T   | p.Leu174Leu | 14 | 6 |
| 4058762 | <i>Rv3618</i>    | Rv3618  | 1231 | 1.71959E-05 | 10  | missense_variant      | MODERATE | c.65C>T    | p.Thr22Ile  | 8  | 4 |
| 4067394 | <i>hpt</i>       | Rv3624c | 1017 | 1.50744E-08 | 7   | upstream_gene_variant | MODIFIER | c.-3490G>C |             | 10 | 6 |
| 4076016 | <i>Rv3636</i>    | Rv3636  | 1231 | 1.71959E-05 | 10  | missense_variant      | MODERATE | c.265C>G   | p.Arg89Gly  | 8  | 4 |
| 4117356 | <i>Rv3677c</i>   | Rv3677c | 1227 | 2.99092E-06 | 10  | missense_variant      | MODERATE | c.697G>C   | p.Glu233Gln | 7  | 4 |
| 4117974 | <i>Rv3677c</i>   | Rv3677c | 1017 | 1.50744E-08 | 7   | synonymous_variant    | LOW      | c.79T>C    | p.Leu27Leu  | 10 | 6 |
| 4130795 | <i>Rv3689</i>    | Rv3689  | 1017 | 1.50744E-08 | 7   | missense_variant      | MODERATE | c.439A>G   | p.Ile147Val | 10 | 6 |
| 4143453 | <i>Rv3700c</i>   | Rv3700c | 1017 | 1.50744E-08 | 7   | synonymous_variant    | LOW      | c.468G>A   | p.Pro156Pro | 10 | 6 |
| 4161437 | <i>Rv3717</i>    | Rv3717  | 1017 | 1.50744E-08 | 7   | synonymous_variant    | LOW      | c.390G>A   | p.Pro130Pro | 10 | 6 |
| 4204224 | <i>proV</i>      | Rv3758c | 470  | 1.55984E-09 | 216 | missense_variant      | MODERATE | c.194A>G   | p.Asp65Gly  | 0  | 2 |
| 4228988 | <i>glfT1</i>     | Rv3782  | 1227 | 2.99092E-06 | 10  | synonymous_variant    | LOW      | c.642G>A   | p.Leu214Leu | 7  | 4 |
| 4258229 | <i>pks13</i>     | Rv3800c | 1017 | 1.50744E-08 | 7   | missense_variant      | MODERATE | c.2918T>C  | p.Ile973Thr | 10 | 6 |
| 4277325 | <i>PE_PGRS62</i> | Rv3812  | 617  | 1.59682E-09 | 215 | missense_variant      | MODERATE | c.755C>G   | p.Ala252Gly | 0  | 2 |
| 4285042 | <i>papA2</i>     | Rv3820c | 1019 | 6.34814E-06 | 7   | missense_variant      | MODERATE | c.784A>C   | p.Met262Leu | 14 | 6 |
| 4314255 | <i>bfrB</i>      | Rv3841  | 1017 | 1.50744E-08 | 7   | synonymous_variant    | LOW      | c.78A>G    | p.Ala26Ala  | 10 | 6 |
| 4338537 | <i>glfB</i>      | Rv3859c | 1019 | 6.34814E-06 | 7   | upstream_gene_variant | MODIFIER | c.-2456T>C |             | 14 | 6 |
| 4343176 | <i>espH</i>      | Rv3867  | 1019 | 6.34814E-06 | 7   | missense_variant      | MODERATE | c.407A>C   | p.Asp136Ala | 14 | 6 |
| 4369452 | <i>mycP2</i>     | Rv3886c | 1227 | 2.99092E-06 | 10  | frameshift_variant    | HIGH     | c.718delG  | p.Val240fs  | 7  | 4 |
| 4381079 | <i>eccB2</i>     | Rv3895c | 1019 | 6.34814E-06 | 7   | missense_variant      | MODERATE | c.862A>G   | p.Ser288Gly | 14 | 6 |
| 4382055 | <i>Rv3896c</i>   | Rv3896c | 1017 | 1.50744E-08 | 7   | missense_variant      | MODERATE | c.797C>T   | p.Ala266Val | 10 | 6 |
| 4407686 | <i>gid</i>       | Rv3919c | 1227 | 2.99092E-06 | 10  | stop_gained           | HIGH     | c.517G>T   | p.Glu173*   | 7  | 4 |

**Supplementary Table S5: Loci found by phyOverlap and their significant associations with different phenotypes in the Hanoi and KwaZulu-Natal study population**

| <b>cluster[+]<br/>Hanoi</b> | <b>S315T[+]<br/>Hanoi</b> | <b>cluster[+]/S315T[+]<br/>Hanoi</b> | <b>cluster[+]<br/>KwaZulu-<br/>Natal</b> | <b>S315T[+]<br/>KwaZulu-<br/>Natal</b> | <b>cluster[+]/S315T[+]<br/>KwaZulu-Natal</b> | <b>Locus</b>                                                               | <b>Number of<br/>loci</b> |
|-----------------------------|---------------------------|--------------------------------------|------------------------------------------|----------------------------------------|----------------------------------------------|----------------------------------------------------------------------------|---------------------------|
| No                          | <b>Yes</b>                | No                                   | No                                       | No                                     | No                                           | Rv3428c-Rv3429, Rv0682, Rv0758, Rv3169,<br>Rv3680-Rv3681c, Rv3647c-Rv3648c | 6                         |
| No                          | No                        | No                                   | <b>Yes</b>                               | No                                     | <b>Yes</b>                                   | Rv0006, Rv0747, Rv1452c                                                    | 3                         |
| No                          | No                        | <b>Yes</b>                           | No                                       | No                                     | No                                           | Rv3511, Rv0278c-Rv0279c, Rv1068c                                           | 3                         |
| No                          | <b>Yes</b>                | No                                   | No                                       | <b>Yes</b>                             | No                                           | Rv0667, Rv2043c                                                            | 2                         |
| No                          | No                        | No                                   | <b>Yes</b>                               | <b>Yes</b>                             | <b>Yes</b>                                   | Rv1753c                                                                    | 1                         |
| No                          | No                        | No                                   | <b>Yes</b>                               | <b>Yes</b>                             | No                                           | RVnc0003-Rv2049c                                                           | 1                         |
| No                          | No                        | No                                   | No                                       | <b>Yes</b>                             | No                                           | Rv3806c                                                                    | 1                         |
| No                          | No                        | No                                   | <b>Yes</b>                               | No                                     | No                                           | Rv1087                                                                     | 1                         |
| No                          | <b>Yes</b>                | <b>Yes</b>                           | No                                       | No                                     | No                                           | Rv3021c                                                                    | 1                         |

cluster[+]: clustered (pairwise SNV difference between two isolates is no more than five SNVs); S315T[+]: harboring *katG*-S315T mutation; Hanoi: Hanoi's study cohort; KwaZulu-Natal: KwaZulu-Natal's study cohort

**Supplementary Table S6: Associations between variants and spread of strains carrying *katG*-S315T mutation (cluster+]/S315T[+) by univariate and multivariate analyses using logistic regression models in Hanoi's study population**

**S6a) Between k-mers and cluster+]/S315T[+]**

| Gene harboring k-mers | Pattern of k-mer presence/absence among all samples | Corresponding variants* | Odds Ratio | 95% CI     | Adjusted Odds Ratio** | 95%CI      |
|-----------------------|-----------------------------------------------------|-------------------------|------------|------------|-----------------------|------------|
| <i>PPE18/19</i>       | rs14                                                | Yes (SNV)               | 22.81      | 6.69-77.85 | 13.20                 | 3.49-49.96 |
| <i>gid</i>            | rs230                                               | Yes (SNV)               | 16.10      | 4.10-63.23 | 12.42                 | 2.81-54.90 |
|                       | rs138                                               | No                      | 0.07       | 0.02-0.22  | 0.05                  | 0.01-0.19  |
|                       | rs229                                               | No                      | 0.06       | 0.02-0.24  | 0.08                  | 0.02-0.36  |
| <i>emrB</i>           | rs44                                                | Yes (SNV)               | 18.55      | 5.61-61.29 | 11.98                 | 3.24-44.29 |
| <i>Rv1588c</i>        | rs71                                                | Yes (SNV)               | 0.05       | 0.02-0.18  | 0.08                  | 0.02-0.31  |
| <i>pncA</i>           | rs186                                               | Yes (SNV)               | 0.02       | 0.002-0.24 | 0.01                  | 0.00-0.25  |

**S6b) Between SNVs or small indels and cluster+]/S315T[+]**

| Gene harboring k-mers | Variants    | Odds Ratio | 95% CI      | Adjusted Odds Ratio** | 95%CI        |
|-----------------------|-------------|------------|-------------|-----------------------|--------------|
| <i>PPE18/19</i>       | SNV (E99A)  | 22.81      | 6.69-77.85  | 13.20                 | 3.49-49.96   |
|                       | SNV (A101T) | 22.81      | 6.69-77.85  | 13.20                 | 3.49-49.96   |
| <i>gid</i>            | SNV (E173*) | 16.10      | 4.10-63.23  | 12.42                 | 2.81-54.90   |
|                       | SNV (F508S) | 20.47      | 6.10-68.62  | 12.59                 | 3.40-26.58   |
| <i>emrB</i>           | SNV (F508S) | 20.47      | 6.10-68.62  | 12.59                 | 3.40-26.58   |
| <i>Rv1588c</i>        | SNV (P34P)  | 20.47      | 6.10-68.62  | 12.59                 | 3.40-26.58   |
| <i>pncA</i>           | SNV (Q141P) | 48.62      | 4.14-571.15 | 128.86                | 4.02-4133.63 |

**S6c) Between *PPE46/47*-like chimeric genes and cluster+]/S315T[+]**

| Presence of <i>PPE46/47</i> -like chimeric gene | Proportion (%) | Odds Ratio | 95% CI     | Adjusted Odds Ratio** | 95%CI      |
|-------------------------------------------------|----------------|------------|------------|-----------------------|------------|
| No                                              | 9/295 (3.1)    | Reference  | -          | Reference             | -          |
| Yes                                             | 6/37 (16.2)    | 6.15       | 2.05-18.43 | 6.81                  | 2.13-21.72 |

\* found by variant-based GWAS or deletion-based GWAS or BLAST search

\*\* adjusted Odds Ratio: adjustment for patients' age, gender, living area, and Mtb lineage

95%CI: 95% confidence interval; SNV: single nucleotide variant; GWAS: genome wide association study
